# Supplementary material for: Organocatalytic 1,6-hydrophosphination of para-quinone methides: enantioselective access to chiral 3-phosphoxindoles bearing phosphorus-substituted quaternary carbon stereocenters
Source: Royal Society of Chemistry journal article supplement (doi:10.1039/d0qo01638a), 2021-01-01
Supplement: d0qo01638a1.pdf [file d0qo01638a1.pdf]

## Supporting Information

# Organocatalytic 1,6-hydrophosphination of *para*-quinone methides: enantioselective access to phosphorus-substituted quaternary carbon stereocenters

Lisheng Wang,<sup>a,b</sup> Fuxing Yang,<sup>a</sup> Xiaoping Xu,<sup>a</sup> Jun Jiang<sup>\*a</sup>

<sup>a</sup>School of Chemistry and Chemical Engineering, Guangxi University, Nanning, 530004, P. R. China

<sup>b</sup>Medicinal College, Guangxi University, Nanning, 530004, P. R. China

### Contents:

|                                                                                                                      |    |
|----------------------------------------------------------------------------------------------------------------------|----|
| General remarks and materials .....                                                                                  | 2  |
| General Procedures.....                                                                                              | 2  |
| References:.....                                                                                                     | 5  |
| Analysis data for products.....                                                                                      | 6  |
| Single Crystal X-ray Structure Determinations of Compound 3l (CCDC: 2019323) .....                                   | 20 |
| <sup>1</sup> H NMR, <sup>13</sup> C NMR, <sup>31</sup> P NMR, <sup>19</sup> F NMR and HPLC spectra for products..... | 22 |

## General remarks and materials

NMR spectra were recorded with a BrukerAvance III HD600 (500) spectrometer at 600 MHz or 500 MHz for  $^1\text{H}$  NMR, 151 MHz or 126 MHz for  $^{13}\text{C}$  NMR, 243 MHz or 202 MHz for  $^{31}\text{P}$  NMR and 565 MHz or 471 MHz for  $^{19}\text{F}$  NMR. Tetramethylsilane (TMS) signals or residual solvent signals were used [TMS  $\delta = 0.00$  ( $^1\text{H}$  NMR),  $\text{CDCl}_3$   $\delta = 77.00$  ( $^{13}\text{C}$  NMR),  $\text{DMSO-}d_6$   $\delta = 2.50$  ( $^1\text{H}$  NMR), 39.52 ( $^{13}\text{C}$  NMR)] as internal standards. Data for  $^1\text{H}$  NMR are reported in parts per million as follows: chemical shift, multiplicity (s = singlet, d = doublet, t = triplet, q = quartet, dd = double doublet, m = multiplet, hept = heptet). Data for  $^{13}\text{C}$  NMR,  $^{31}\text{P}$  NMR and  $^{19}\text{F}$  NMR are reported in terms of chemical shift in parts per million. HRMS (ESI) Mass spectra were recorded on Waters Xevo G2 Q-TOF MS with Acquity UPLC. Column chromatography was carried out on silica gel (particle size 300-400 mesh). HPLC analysis was performed on Shanghai Wufeng LC-P100 equipped with Daicel chiralpak IC, OD-H and AD-H. The racemic standards used in HPLC studies were prepared according to the general procedure by using DABCO. Unless stated otherwise, all the solvents and reagents were purchased from commercial suppliers and used without further purification. We used the commercial available powdered molecular sieves in the reaction. Molecular sieves were flame-dried under vacuum. Substrates **1** were synthesized according to the published procedures.<sup>1</sup> Substrates **2** were prepared according to the literature method.<sup>2</sup> Substrate **4** was prepared according to the literature method.<sup>3</sup> Catalysts **Q-5** was prepared according to the literature method.<sup>4</sup>

## General Procedures

### General Procedure for Optimization of Reaction Conditions (Table 1 and Table S1):

The solvent was added to the mixture of **1a** (33.5 mg, 0.1 mmol), **2a** (40.4 mg, 0.2 mmol) and catalyst under the indicated temperature in Table 1. Upon completion (monitored by TLC), the mixture was purified by column chromatography on silica gel (petroleum ether/ethyl acetate = 2/1) to give the product **3a**.

**Table S1.** Optimization of the catalysts <sup>a</sup>

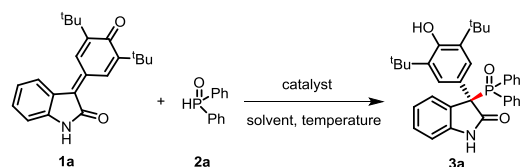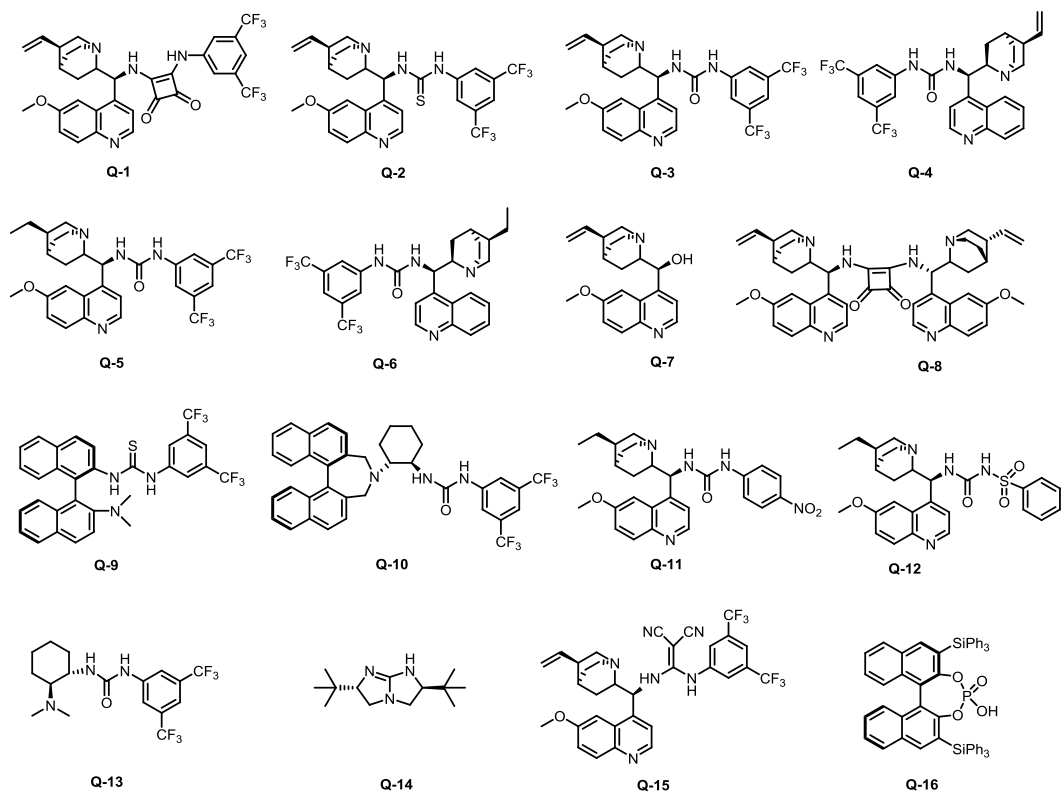

| entry | catalyst    | solvent | temp. (°C) | yield (%) <sup>b</sup> | er <sup>c</sup> |
|-------|-------------|---------|------------|------------------------|-----------------|
| 1     | <b>Q-1</b>  | toluene | rt         | 55                     | 75:25           |
| 2     | <b>Q-2</b>  | toluene | rt         | 74                     | 75:25           |
| 3     | <b>Q-3</b>  | toluene | rt         | 84                     | 83:17           |
| 4     | <b>Q-4</b>  | toluene | rt         | 83                     | 28:72           |
| 5     | <b>Q-5</b>  | toluene | rt         | 75                     | 84.5:15.5       |
| 6     | <b>Q-6</b>  | toluene | rt         | 65                     | 21:79           |
| 7     | <b>Q-7</b>  | toluene | rt         | 35                     | 59:41           |
| 8     | <b>Q-8</b>  | toluene | rt         | 26                     | 55:45           |
| 9     | <b>Q-9</b>  | toluene | rt         | 46                     | 52:48           |
| 10    | <b>Q-10</b> | toluene | rt         | 37                     | 50:50           |
| 11    | <b>Q-11</b> | toluene | rt         | 74                     | 60:40           |
| 12    | <b>Q-12</b> | toluene | rt         | 52                     | 73:27           |
| 13    | <b>Q-13</b> | toluene | rt         | 89                     | 68:32           |
| 14    | <b>Q-14</b> | toluene | rt         | NR                     | -               |
| 15    | <b>Q-15</b> | toluene | rt         | 36                     | 72.5:27.5       |
| 16    | <b>Q-16</b> | toluene | rt         | NR                     | -               |

<sup>a</sup>Reaction conditions; **1a** (0.10 mmol), **2a** (0.20 mmol), catalyst (10 mol %), solvent (2 mL), 36 h. <sup>b</sup>Isolated yield. <sup>c</sup>Determined by HPLC on a chiral stationary phase. NR = No Reaction.

**General Procedure for asymmetric 1,6-hydrophosphination of *p*-QMs with H-phosphine oxides (Table 2, Table 3):**

Mesitylene (4 mL) was added to the mixture of **1** (0.1 mmol), **2** (0.2 mmol), molecular sieves (50 mg, 5 Å) and catalyst **Q-5** (11.6 mg, 0.02 mmol) at -20 °C. Upon completion (monitored by TLC), the mixture was purified by column chromatography on silica gel (petroleum ether/ethyl acetate) to give the product.

**General Procedure for asymmetric 1,6-hydrophosphination of *p*-QMs derived from aldehyde with H-phosphine oxide:**

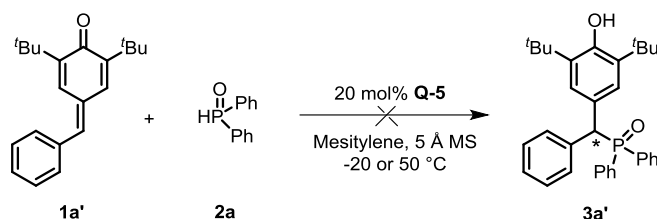

Mesitylene (4 mL) was added to the mixture of **1a'** (0.1 mmol), **2** (0.2 mmol), molecular sieves (50 mg, 5 Å) and catalyst **Q-5** (11.6 mg, 0.02 mmol) at -20 or 50 °C. The procedure was monitored by TLC. No desired product was found.

**General procedure for scale-up reaction (Scheme 2a):**

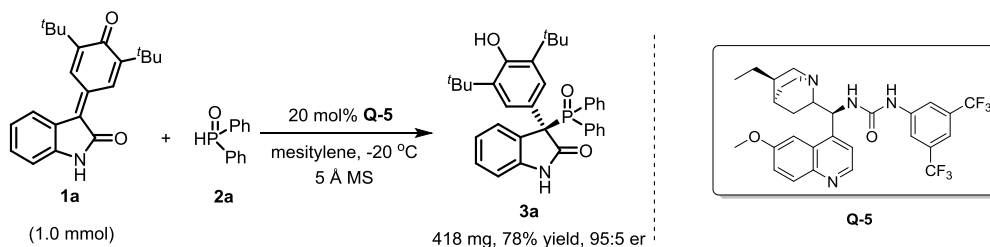

Mesitylene (40 mL) was added to the mixture of **1a** (335 mg, 1 mmol), **2a** (404 mg, 2 mmol), molecular sieves (500 mg, 5 Å) and catalyst **Q-5** (116 mg, 0.02 mmol) at -20 °C. The reaction was stirred at -20 °C for 72 h. Upon completion (monitored by TLC), the mixture was purified by column chromatography on silica gel (petroleum ether/ethyl acetate = 2/1) to give the product **3a** in 78% yield and 95:5 er. Then, the pure catalyst could be isolated and recovered in 89% yield (103.5 mg) by using CH<sub>2</sub>Cl<sub>2</sub>/MeOH/Et<sub>3</sub>N 100:2:1 as eluent.

**General procedure for the synthesis of compound 4 (Scheme 2b):**

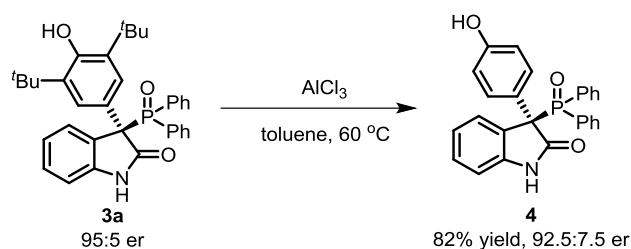

To a solution of **3a** (161.3 mg, 0.3 mmol) in toluene (3 mL) at rt was added  $\text{AlCl}_3$  (20 equiv) in one portion. Then the mixture was stirred at 60 °C for 2 h. Upon completion (monitored by TLC), the mixture was cooled to room temperature and poured into 10 mL ice water. The mixture was extracted 3x with 10 mL ethyl acetate and the combined organic layers are dried over  $\text{Na}_2\text{SO}_4$ , filtered, and concentrated *in vacuo*. And then the residue was purified by column chromatography on silica gel (petroleum ether/ethyl acetate = 1/2) to give the product **4** in 82% yield with 92.5:7.5 er.

#### General procedure for the synthesis of compound (*R*)-**3l**:

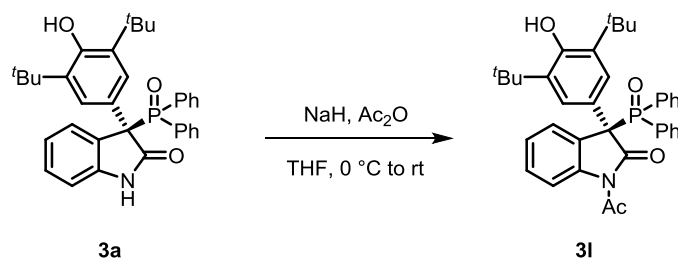

To a solution of **3a** (161.3 mg, 0.3 mmol) in 3 mL anhydrous THF was added NaH (21.6 mg, 0.9 mmol) at 0 °C. After the mixture was stirred at 0 °C for 0.5 h,  $\text{Ac}_2\text{O}$  (36.8 mg, 0.36 mmol) was added at the same temperature. Then the mixture was stirred at room temperature for 3 h. Upon completion (monitored by TLC), water (5 mL) was added. The mixture was extracted 3x with 10 mL ethyl acetate and the combined organic layers are dried over  $\text{Na}_2\text{SO}_4$ , filtered, and concentrated *in vacuo*. And then the residue was purified by column chromatography on silica gel (petroleum ether/ethyl acetate = 5/1) to give the product **3l** in 66% yield with 93.5:6.5 er.

#### References:

1. H. Wang, K. Wang, Y. Man, X. Gao, L. Yang, Y. Ren, N. Li, B. Tang, G. Zhao, *Adv. Synth. Catal.* 2017, **359**, 3934.
2. C. A. Busacca, J. C. Lorenz, N. Grinberg, N. Haddad, M. Hrapchak, B. Latli, H. Lee, P. Sabila, A. Saha, M. Sarvestani, S. Shen, R. Varsolona, X. Wei, C. H. Senanayake, *Org. Lett.* 2005, **7**, 4277.
3. Z. Feng, Z. Yuan, X. Zhao, Y. Huang, H. Yao, *Org. Chem. Front.* 2019, **6**, 3535.
4. M. S. Manna, S. Mukherjee, *J. Am. Chem. Soc.* 2015, **137**, 130.

## Analysis data for products

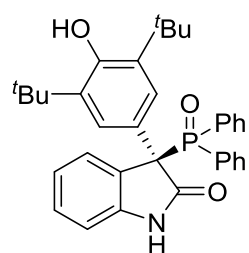

(*R*)-**3a**, white solid, 78% yield, 95:5 er;  $^1\text{H NMR}$  (500 MHz, Chloroform-*d*)  $\delta$  8.34 (s, 1H), 7.87–7.78 (m, 2H), 7.57–7.46 (m, 6H), 7.39–7.33 (m, 3H), 7.23 (td,  $J = 7.8, 3.2$  Hz, 2H), 7.18 (t,  $J = 7.7$  Hz, 1H), 7.03 (t,  $J = 7.4$  Hz, 1H), 6.68 (d,  $J = 7.7$  Hz, 1H), 5.17 (s, 1H), 1.30 (s, 18H);  $^{13}\text{C NMR}$  (126 MHz, Chloroform-*d*)  $\delta$  174.93, 153.37 (d,  $J = 2.5$  Hz), 140.82 (d,  $J = 6.2$  Hz), 135.30 (d,  $J = 1.7$  Hz), 133.45 (d,  $J = 8.7$  Hz), 132.27 (d,  $J = 9.0$  Hz), 131.85 (d,  $J = 2.8$  Hz), 131.79 (d,  $J = 2.7$  Hz), 130.18 (d,  $J = 86.5$  Hz), 129.39 (d,  $J = 88.6$  Hz), 128.66 (d,  $J = 1.2$  Hz), 128.63, 127.82 (d,  $J = 7.2$  Hz), 127.73 (d,  $J = 7.0$  Hz), 126.57 (d,  $J = 4.3$  Hz), 125.62 (d,  $J = 4.8$  Hz), 122.95 (d,  $J = 5.3$  Hz), 122.08 (d,  $J = 2.0$  Hz), 109.45, 62.03 (d,  $J = 56.5$  Hz), 34.52, 30.11;  $^{31}\text{P NMR}$  (202 MHz,  $\text{CDCl}_3$ )  $\delta$  28.80; **HRMS** (ESI) Calcd. for  $\text{C}_{34}\text{H}_{36}\text{NO}_3\text{PNa}$  ( $\text{M}+\text{Na}$ ) $^+$  560.2325, Found: 560.2321; **HPLC** (Chiral IC,  $\lambda = 254$  nm, hexane/2-propanol = 3/1, Flow rate = 0.6 mL/min),  $t_R = 7.915$  min, 20.448 min.

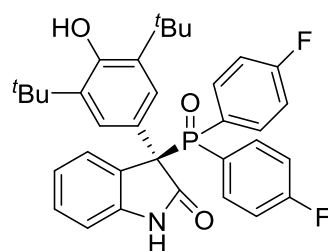

(*R*)-**3b**, white solid, 81% yield, 96:4 er;  $^1\text{H NMR}$  (500 MHz, Chloroform-*d*)  $\delta$  7.94 (ddd,  $J = 10.5, 8.7, 5.8$  Hz, 2H), 7.70 (d,  $J = 9.3$  Hz, 2H), 7.55 (d,  $J = 1.6$  Hz, 2H), 7.47 (ddd,  $J = 10.7, 8.7, 5.7$  Hz, 2H), 7.22 (t,  $J = 7.7$  Hz, 1H), 7.12–7.03 (m, 3H), 6.94 (td,  $J = 8.7, 2.2$  Hz, 2H), 6.69 (d,  $J = 7.8$  Hz, 1H), 5.17 (s, 1H), 1.31 (s, 18H);  $^{13}\text{C NMR}$  (126 MHz, Chloroform-*d*)  $\delta$  174.96, 166.05 (dd,  $J = 15.4, 3.2$  Hz), 164.03 (dd,  $J = 15.4, 3.4$  Hz), 153.43 (d,  $J = 2.3$  Hz), 140.62 (d,  $J = 6.3$  Hz), 135.94 (t,  $J = 9.4$  Hz), 135.58 (d,  $J = 1.5$  Hz), 134.69 (t,  $J = 9.5$  Hz), 128.84 (d,  $J = 1.5$  Hz), 128.56 (d,  $J = 2.6$  Hz), 126.49 (d,  $J = 4.1$  Hz), 126.00 (dd,  $J = 86.3, 3.0$  Hz), 125.35 (d,  $J = 4.9$  Hz), 125.19 (dd,  $J = 89.7, 3.5$  Hz), 123.09 (d,  $J = 5.2$  Hz), 122.34 (d,  $J = 1.6$  Hz), 115.30 (dd,  $J = 13.4, 3.7$  Hz), 115.13 (dd,  $J = 13.2, 3.7$  Hz), 109.50, 62.18 (d,  $J = 58.1$  Hz), 34.53, 30.11;  $^{31}\text{P NMR}$  (202 MHz,  $\text{CDCl}_3$ )  $\delta$  28.15;  $^{19}\text{F NMR}$  (471 MHz, Chloroform-*d*)  $\delta$  -106.27 (d,  $J = 3.8$  Hz), -106.51 (d,  $J = 4.6$  Hz); **HRMS** (ESI) Calcd. for  $\text{C}_{34}\text{H}_{34}\text{F}_2\text{NO}_3\text{PNa}$  ( $\text{M}+\text{Na}$ ) $^+$  596.2137, Found: 596.2137; **HPLC** (Chiral AD-H,  $\lambda = 254$  nm, hexane/2-propanol = 3/1, Flow rate = 0.6 mL/min),  $t_R = 14.015$  min, 19.598 min.

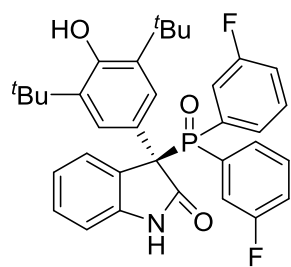

(*R*)-**3c**, white solid, 93% yield, 90:10 er; **<sup>1</sup>H NMR** (500 MHz, Chloroform-*d*)  $\delta$  7.81 (s, 1H), 7.74–7.60 (m, 3H), 7.56 (d,  $J$  = 1.8 Hz, 2H), 7.41–7.34 (m, 1H), 7.34–7.27 (m, 1H), 7.26–7.15 (m, 4H), 7.10 (t,  $J$  = 7.9 Hz, 2H), 6.72 (d,  $J$  = 7.8 Hz, 1H), 5.18 (s, 1H), 1.32 (s, 18H). **<sup>13</sup>C NMR** (126 MHz, Chloroform-*d* + DMSO-*d*<sub>6</sub>)  $\delta$  174.30, 162.46 (t,  $J$  = 16.6 Hz), 160.49 (t,  $J$  = 16.8 Hz), 153.05 (d,  $J$  = 2.5 Hz), 141.41 (d,  $J$  = 6.5 Hz), 135.56, 132.42 (dd,  $J$  = 87.7, 5.4 Hz), 131.64 (dd,  $J$  = 91.4, 5.7 Hz), 129.44 (d,  $J$  = 7.5 Hz), 129.36, 129.27 (d,  $J$  = 7.4 Hz), 128.80 (dd,  $J$  = 8.3, 2.9 Hz), 128.55 (d,  $J$  = 1.5 Hz), 127.91 (d,  $J$  = 2.4 Hz), 127.49 (dd,  $J$  = 8.1, 2.9 Hz), 125.88 (d,  $J$  = 4.2 Hz), 124.98 (d,  $J$  = 5.0 Hz), 122.86 (d,  $J$  = 5.6 Hz), 121.51, 119.87 (dd,  $J$  = 23.4, 9.5 Hz), 118.68 (d,  $J$  = 21.3 Hz), 118.53 (dd,  $J$  = 22.8, 9.6 Hz), 109.46, 61.62 (d,  $J$  = 59.1 Hz), 34.21, 29.76; **<sup>31</sup>P NMR** (202 MHz, Chloroform-*d*)  $\delta$  26.85 (t,  $J$  = 5.7 Hz); **<sup>19</sup>F NMR** (471 MHz, Chloroform-*d*)  $\delta$  -111.29 (d,  $J$  = 5.7 Hz), -111.51 (d,  $J$  = 5.9 Hz); **HRMS** (ESI) Calcd. for C<sub>34</sub>H<sub>34</sub>F<sub>2</sub>NO<sub>3</sub>PNa (M+Na)<sup>+</sup> 596.2137, Found: 596.2138; **HPLC** (Chiral AD-H,  $\lambda$  = 254 nm, hexane/ethanol = 3/1, Flow rate = 0.6 mL/min),  $t_R$  = 7.357 min, 12.323 min.

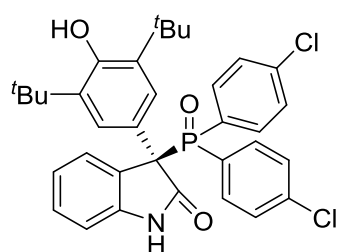

(*R*)-**3d**, white solid, 67% yield, 94:6 er; **<sup>1</sup>H NMR** (500 MHz, Chloroform-*d*)  $\delta$  9.03 (s, 1H), 7.80 (dd,  $J$  = 10.5, 8.6 Hz, 2H), 7.65 (d,  $J$  = 7.4 Hz, 1H), 7.55 (d,  $J$  = 1.0 Hz, 2H), 7.44 (dd,  $J$  = 10.6, 8.5 Hz, 2H), 7.35 (dd,  $J$  = 8.5, 2.2 Hz, 2H), 7.20 (dd,  $J$  = 8.5, 2.2 Hz, 2H), 7.17 (t,  $J$  = 7.7 Hz, 1H), 7.05 (t,  $J$  = 7.6 Hz, 1H), 6.65 (d,  $J$  = 7.7 Hz, 1H), 5.23 (s, 1H), 1.31 (s, 18H); **<sup>13</sup>C NMR** (126 MHz, Chloroform-*d*)  $\delta$  174.86, 153.49 (d,  $J$  = 2.5 Hz), 140.88 (d,  $J$  = 6.3 Hz), 138.78 (d,  $J$  = 3.5 Hz), 138.69 (d,  $J$  = 3.4 Hz), 135.59 (d,  $J$  = 1.8 Hz), 134.72 (d,  $J$  = 9.7 Hz), 133.52 (d,  $J$  = 9.8 Hz), 128.91 (d,  $J$  = 1.7 Hz), 128.47 (d,  $J$  = 3.0 Hz), 128.41 (d,  $J$  = 64.5 Hz), 128.28 (d,  $J$  = 2.0 Hz), 128.18 (d,  $J$  = 2.4 Hz), 127.61 (d,  $J$  = 68.4 Hz), 126.25 (d,  $J$  = 4.3 Hz), 125.39 (d,  $J$  = 4.9 Hz), 122.70 (d,  $J$  = 5.4 Hz), 122.28 (d,  $J$  = 1.9 Hz), 109.72, 61.92 (d,  $J$  = 58.5 Hz), 34.52, 30.07; **<sup>31</sup>P NMR** (202 MHz, CDCl<sub>3</sub>)  $\delta$  27.99; **HRMS** (ESI) Calcd. for C<sub>34</sub>H<sub>34</sub>Cl<sub>2</sub>NO<sub>3</sub>PNa (M+Na)<sup>+</sup> 628.1546,

Found: 628.1551; **HPLC** (Chiral AD-H,  $\lambda = 254$  nm, hexane/ethanol = 3/1, Flow rate = 0.6 mL/min),  $t_R = 11.981$  min, 18.073 min.

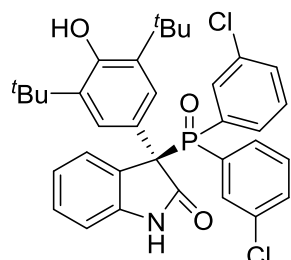

(*R*)-**3e**, white solid, 90% yield, 95:5 er;  **$^1\text{H NMR}$**  (500 MHz, Chloroform-*d*)  $\delta$  8.17 (s, 1H), 7.87 (d,  $J = 11.3$  Hz, 1H), 7.79 (t,  $J = 9.3$  Hz, 1H), 7.66 (d,  $J = 7.5$  Hz, 1H), 7.57 (d,  $J = 1.0$  Hz, 2H), 7.48–7.35 (m, 4H), 7.33 (td,  $J = 7.9, 3.8$  Hz, 1H), 7.25–7.17 (m, 2H), 7.11 (t,  $J = 7.6$  Hz, 1H), 6.74 (d,  $J = 7.7$  Hz, 1H), 5.20 (s, 1H), 1.33 (s, 18H);  **$^{13}\text{C NMR}$**  (126 MHz,

Chloroform-*d*)  $\delta$  174.82, 153.60 (d,  $J = 2.5$  Hz), 140.95 (d,  $J = 6.4$  Hz), 135.71 (d,  $J = 1.9$  Hz), 134.41, 134.28, 133.11 (d,  $J = 9.7$  Hz), 132.21 (d,  $J = 2.6$  Hz), 132.18 (d,  $J = 2.6$  Hz), 132.04 (d,  $J = 9.6$  Hz), 131.95 (d,  $J = 78.4$  Hz), 131.43 (d,  $J = 8.5$  Hz), 131.18 (d,  $J = 81.5$  Hz), 130.06 (d,  $J = 8.8$  Hz), 129.33 (d,  $J = 9.5$  Hz), 129.23 (d,  $J = 9.4$  Hz), 129.11 (d,  $J = 1.7$  Hz), 128.40 (d,  $J = 3.1$  Hz), 125.91 (d,  $J = 4.3$  Hz), 125.39 (d,  $J = 4.9$  Hz), 122.43, 122.38, 109.84, 61.94 (d,  $J = 58.2$  Hz), 34.54, 30.09;  **$^{31}\text{P NMR}$**  (202 MHz,  $\text{CDCl}_3$ )  $\delta$  26.87; **HRMS** (ESI) Calcd. for  $\text{C}_{34}\text{H}_{34}\text{Cl}_2\text{NO}_3\text{PNa}$  ( $\text{M}+\text{Na}$ ) $^+$  628.1546, Found: 628.1537; **HPLC** (Chiral AD-H,  $\lambda = 254$  nm, hexane/ethanol = 3/1, Flow rate = 0.6 mL/min),  $t_R = 7.040$  min, 11.007 min.

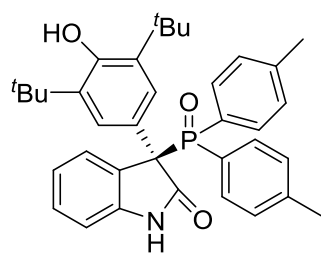

(*R*)-**3f**, white solid, 78% yield, 91:9 er;  **$^1\text{H NMR}$**  (500 MHz, Chloroform-*d*)  $\delta$  8.71 (s, 1H), 7.65 (dd,  $J = 10.4, 8.3$  Hz, 2H), 7.55 (d,  $J = 0.8$  Hz, 2H), 7.51 (d,  $J = 7.3$  Hz, 1H), 7.41 (dd,  $J = 10.8, 8.1$  Hz, 2H), 7.14 (t,  $J = 7.6$  Hz, 3H), 7.05–6.97 (m, 3H), 6.66 (d,  $J = 7.7$  Hz, 1H), 5.16 (s, 1H), 2.36 (s, 3H), 2.24 (s, 3H), 1.30 (s, 18H);  **$^{13}\text{C NMR}$**  (126

MHz, Chloroform-*d*)  $\delta$  175.15, 153.24 (d,  $J = 2.4$  Hz), 142.10 (d,  $J = 2.7$  Hz), 142.04 (d,  $J = 2.6$  Hz), 141.18 (d,  $J = 5.9$  Hz), 135.08 (d,  $J = 1.6$  Hz), 133.36 (d,  $J = 9.0$  Hz), 132.30 (d,  $J = 9.2$  Hz), 128.52 (d,  $J = 2.1$  Hz), 128.48 (d,  $J = 1.8$  Hz), 127.13 (d,  $J = 95.2$  Hz), 126.78, 126.33 (d,  $J = 94.5$  Hz), 125.68 (d,  $J = 4.5$  Hz), 123.05 (d,  $J = 5.1$  Hz), 121.77 (d,  $J = 1.6$  Hz), 109.60, 61.87 (d,  $J = 56.6$  Hz), 34.48, 30.08, 21.52, 21.43;  **$^{31}\text{P NMR}$**  (202 MHz,  $\text{CDCl}_3$ )  $\delta$  29.32; **HRMS** (ESI) Calcd. for  $\text{C}_{36}\text{H}_{40}\text{NO}_3\text{PNa}$  ( $\text{M}+\text{Na}$ ) $^+$



588.2638, Found: 588.2645; **HPLC** (Chiral AD-H,  $\lambda = 254$  nm, hexane/ethanol = 3/1, Flow rate = 0.6 mL/min),  $t_R = 13.973$  min, 28.832 min.

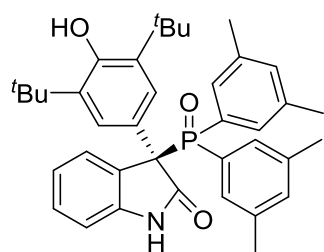

(*R*)-**3g**, white solid, 93% yield, 95:5 er;  **$^1\text{H NMR}$**  (500 MHz, Chloroform-*d*)  $\delta$  8.16 (s, 1H), 7.61 (d,  $J = 1.6$  Hz, 2H), 7.39 (d,  $J = 7.5$  Hz, 1H), 7.33 (d,  $J = 11.2$  Hz, 2H), 7.20 (t,  $J = 7.7$  Hz, 1H), 7.09 (s, 1H), 7.06–7.01 (m, 3H), 7.00 (s, 1H), 6.70 (d,  $J = 7.7$  Hz, 1H), 5.16 (s, 1H), 2.25 (s, 6H), 2.15 (s, 6H), 1.32 (s, 18H);  **$^{13}\text{C NMR}$**  (126 MHz, Chloroform-*d*)  $\delta$  174.88, 153.30 (d,  $J = 2.4$  Hz), 141.42 (d,  $J = 5.9$  Hz), 137.23 (d,  $J = 9.2$  Hz), 137.13 (d,  $J = 9.2$  Hz), 135.20 (d,  $J = 1.7$  Hz), 133.48 (d,  $J = 2.9$  Hz), 133.38 (d,  $J = 2.9$  Hz), 130.99 (d,  $J = 8.6$  Hz), 130.07 (d,  $J = 97.4$  Hz), 130.02 (d,  $J = 9.0$  Hz), 128.86 (d,  $J = 98.4$  Hz), 128.64 (d,  $J = 2.9$  Hz), 128.52 (d,  $J = 1.8$  Hz), 126.53 (d,  $J = 3.7$  Hz), 125.73 (d,  $J = 4.5$  Hz), 123.18 (d,  $J = 5.1$  Hz), 121.76 (d,  $J = 1.4$  Hz), 109.46, 61.94 (d,  $J = 55.4$  Hz), 34.49, 30.17, 21.27, 21.17;  **$^{31}\text{P NMR}$**  (202 MHz,  $\text{CDCl}_3$ )  $\delta$  29.76; **HRMS** (ESI) Calcd. for  $\text{C}_{38}\text{H}_{44}\text{NO}_3\text{PNa}$  ( $\text{M}+\text{Na}$ ) $^+$  616.2951, Found: 616.2953; **HPLC** (Chiral AD-H,  $\lambda = 254$  nm, hexane/2-propanol = 3/1, Flow rate = 0.6 mL/min),  $t_R = 6.632$  min, 10.982 min.

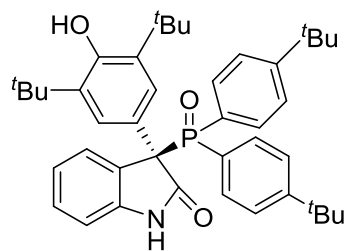

(*R*)-**3h**, white solid, 94% yield, 91:9 er;  **$^1\text{H NMR}$**  (500 MHz, Chloroform-*d*)  $\delta$  7.76 (s, 1H), 7.71 (dd,  $J = 10.1, 8.6$  Hz, 2H), 7.52 (dd,  $J = 10.8, 8.5$  Hz, 2H), 7.48 (d,  $J = 1.0$  Hz, 2H), 7.44 (d,  $J = 6.9$  Hz, 1H), 7.39 (dd,  $J = 8.4, 2.8$  Hz, 2H), 7.28 (dd,  $J = 8.4, 2.6$  Hz, 2H), 7.17 (t,  $J = 7.7$  Hz, 1H), 7.01 (t,  $J = 7.6$  Hz, 1H), 6.69 (d,  $J = 7.7$  Hz, 1H), 5.14 (s, 1H), 1.31 (s, 9H), 1.27 (s, 18H), 1.25 (s, 9H);  **$^{13}\text{C NMR}$**  (126 MHz, Chloroform-*d*)  $\delta$  174.84, 155.13 (d,  $J = 2.8$  Hz), 154.96 (d,  $J = 2.7$  Hz), 153.29 (d,  $J = 2.7$  Hz), 141.11, 134.95 (d,  $J = 2.0$  Hz), 133.37 (d,  $J = 8.8$  Hz), 132.32 (d,  $J = 9.2$  Hz), 128.65, 128.45 (d,  $J = 1.7$  Hz), 127.14 (d,  $J = 90.0$  Hz), 126.56 (d,  $J = 4.0$  Hz), 126.33 (d,  $J = 92.0$  Hz), 125.81 (d,  $J = 4.6$  Hz), 124.80 (d,  $J = 2.8$  Hz), 124.70 (d,  $J = 2.9$  Hz), 122.66 (d,  $J = 5.0$  Hz), 121.71, 109.46, 61.87 (d,  $J = 56.5$  Hz), 34.91, 34.83, 34.50, 31.11, 31.01, 30.11;  **$^{31}\text{P NMR}$**  (202 MHz,  $\text{CDCl}_3$ )  $\delta$  28.97; **HRMS** (ESI) Calcd. for  $\text{C}_{42}\text{H}_{52}\text{NO}_3\text{PNa}$  ( $\text{M}+\text{Na}$ ) $^+$

672.3577, Found: 672.3585; **HPLC** (Chiral IC,  $\lambda = 254$  nm, hexane/ethanol = 5/1, Flow rate = 0.6 mL/min),  $t_R = 7.240$  min, 21.123 min.

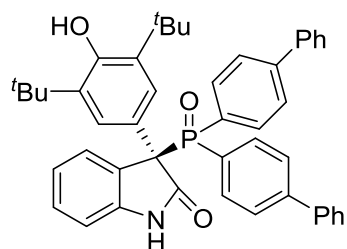

(*R*)-**3i**, white solid, 74% yield, 93:7 er;  **$^1\text{H NMR}$**  (500 MHz, Chloroform-*d*)  $\delta$  8.15 (s, 1H), 7.95 (dd,  $J = 10.5, 8.4$  Hz, 2H), 7.70–7.55 (m, 9H), 7.52–7.42 (m, 6H), 7.42–7.37 (m, 3H), 7.34 (t,  $J = 7.3$  Hz, 1H), 7.19 (t,  $J = 7.7$  Hz, 1H), 7.07 (t,  $J = 7.6$  Hz, 1H), 6.71 (d,  $J = 7.7$  Hz, 1H), 5.16 (s, 1H), 1.30 (s, 18H);  **$^{13}\text{C NMR}$**  (126 MHz, Chloroform-*d*)  $\delta$  175.18, 153.36 (d,  $J = 2.5$  Hz), 144.49 (d,  $J = 2.7$  Hz), 144.30 (d,  $J = 2.8$  Hz), 141.52 (d,  $J = 5.3$  Hz), 139.95, 139.66, 135.26 (d,  $J = 1.4$  Hz), 133.87 (d,  $J = 9.0$  Hz), 132.82 (d,  $J = 9.1$  Hz), 128.85 (d,  $J = 59.3$  Hz), 128.83, 128.73, 128.65, 128.45 (d,  $J = 2.3$  Hz), 128.05 (d,  $J = 62.7$  Hz), 128.00, 127.92, 127.19, 127.06, 126.47 (d,  $J = 3.5$  Hz), 126.42, 126.37 (d,  $J = 3.5$  Hz), 125.72 (d,  $J = 4.5$  Hz), 122.76 (d,  $J = 5.0$  Hz), 121.83, 109.94, 61.99 (d,  $J = 57.4$  Hz), 34.49, 30.06;  **$^{31}\text{P NMR}$**  (202 MHz,  $\text{CDCl}_3$ )  $\delta$  28.98; **HRMS** (ESI) Calcd. for  $\text{C}_{46}\text{H}_{44}\text{NO}_3\text{PNa}$  ( $\text{M}+\text{Na}$ ) $^+$  712.2951, Found: 712.2950; **HPLC** (Chiral AD-H,  $\lambda = 254$  nm, hexane/ethanol = 3/1, Flow rate = 0.6 mL/min),  $t_R = 22.107$  min, 46.023 min.

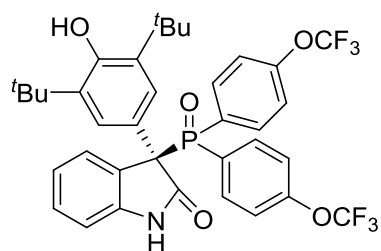

(*R*)-**3j**, white solid, 99% yield, 90.5:9.5 er;  **$^1\text{H NMR}$**  (500 MHz, Chloroform-*d*)  $\delta$  7.80 (s, 1H), 7.74–7.61 (m, 3H), 7.56 (d,  $J = 1.8$  Hz, 2H), 7.41–7.34 (m, 1H), 7.34–7.28 (m, 1H), 7.26–7.15 (m, 4H), 7.10 (t,  $J = 7.9$  Hz, 2H), 6.72 (d,  $J = 7.8$  Hz, 1H), 5.18 (s, 1H), 1.32 (s, 18H);  **$^{13}\text{C NMR}$**  (126 MHz, Chloroform-*d*)  $\delta$  174.76, 153.56 (d,  $J = 2.5$  Hz), 152.06 (dd,  $J = 3.6, 1.9$  Hz), 151.96 (dd,  $J = 3.2, 1.6$  Hz), 140.69 (d,  $J = 6.3$  Hz), 135.68 (d,  $J = 1.8$  Hz), 135.47 (d,  $J = 10.0$  Hz), 134.21 (d,  $J = 10.0$  Hz), 129.01 (d,  $J = 1.8$  Hz), 128.54 (d,  $J = 2.9$  Hz), 128.41 (d,  $J = 59.0$  Hz), 127.61 (d,  $J = 62.4$  Hz), 126.12 (d,  $J = 4.4$  Hz), 125.38, 125.34, 122.60 (d,  $J = 5.4$  Hz), 122.41 (d,  $J = 1.8$  Hz), 120.26 (q,  $J = 259.2$  Hz), 120.18 (q,  $J = 259.3$  Hz), 119.82 (d,  $J = 25.3$  Hz), 109.63, 62.07 (d,  $J = 58.7$  Hz), 34.51, 30.01;  **$^{31}\text{P NMR}$**  (202 MHz,  $\text{CDCl}_3$ )  $\delta$  27.36;  **$^{19}\text{F NMR}$**  (471 MHz,  $\text{CDCl}_3$ )  $\delta$  -57.60, -57.63; **HRMS** (ESI) Calcd. for  $\text{C}_{36}\text{H}_{34}\text{F}_6\text{NO}_5\text{PNa}$  ( $\text{M}+\text{Na}$ ) $^+$  728.1971,

Found: 728.1971; **HPLC** (Chiral AD-H,  $\lambda = 254$  nm, hexane/ethanol = 3/1, Flow rate = 0.6 mL/min),  $t_R$  = 7.573 min, 10.248 min.

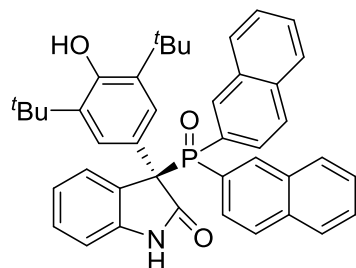

(*R*)-**3k**, white solid, 63% yield, 95:5 er;  $^1\text{H NMR}$  (500 MHz, Chloroform-*d*)  $\delta$  8.46 (d,  $J = 13.2$  Hz, 1H), 8.18 (s, 1H), 8.13 (d,  $J = 13.3$  Hz, 1H), 7.90–7.78 (m, 4H), 7.73 (d,  $J = 8.2$  Hz, 1H), 7.70–7.55 (m, 7H), 7.50 (t,  $J = 7.1$  Hz, 2H), 7.40 (t,  $J = 7.4$  Hz, 1H), 7.16 (t,  $J = 7.4$  Hz, 1H), 7.03 (t,  $J = 7.5$  Hz, 1H), 6.63 (d,  $J = 7.5$  Hz, 1H), 5.14

(s, 1H), 1.23 (s, 18H);  $^{13}\text{C NMR}$  (126 MHz, Chloroform-*d*)  $\delta$  174.80, 153.41 (d,  $J = 2.5$  Hz), 141.00 (d,  $J = 6.2$  Hz), 136.04 (d,  $J = 7.8$  Hz), 135.36 (d,  $J = 1.8$  Hz), 134.76 (d,  $J = 8.3$  Hz), 134.65 (d,  $J = 2.4$  Hz), 134.55 (d,  $J = 2.4$  Hz), 132.24 (d,  $J = 13.2$  Hz), 132.06 (d,  $J = 13.2$  Hz), 129.19, 129.13, 128.69 (d,  $J = 1.8$  Hz), 128.64 (d,  $J = 3.2$  Hz), 128.18, 128.07, 127.99 (d,  $J = 9.9$  Hz), 127.55, 127.49, 127.52 (d,  $J = 7.7$  Hz), 127.35 (d,  $J = 11.8$  Hz), 127.23, 127.14 (d,  $J = 2.5$  Hz), 126.73 (d,  $J = 88.0$  Hz), 126.61 (d,  $J = 4.1$  Hz), 126.47, 126.45, 125.70 (d,  $J = 4.8$  Hz), 123.06 (d,  $J = 5.2$  Hz), 122.12 (d,  $J = 2.0$  Hz), 109.59, 62.08 (d,  $J = 56.8$  Hz), 34.47, 30.05;  $^{31}\text{P NMR}$  (202 MHz,  $\text{CDCl}_3$ )  $\delta$  29.61; **HRMS** (ESI) Calcd. for  $\text{C}_{42}\text{H}_{40}\text{NO}_3\text{PNa}$  ( $\text{M}+\text{Na}$ ) $^+$  660.2638, Found: 660.2638; **HPLC** (Chiral AD-H,  $\lambda = 254$  nm, hexane/ethanol = 3/1, Flow rate = 0.6 mL/min),  $t_R$  = 20.182 min, 65.065 min.

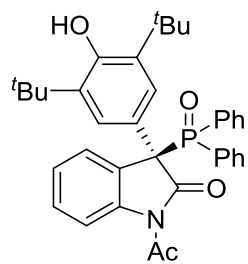

(*R*)-**3l**, white solid, 66% yield, 93.5:6.5 er;  $^1\text{H NMR}$  (500 MHz, Chloroform-*d*)  $\delta$  8.07 (d,  $J = 8.2$  Hz, 1H), 7.78 (dd,  $J = 10.8, 8.2$  Hz, 2H), 7.54–7.41 (m, 5H), 7.41–7.31 (m, 5H), 7.29–7.27 (m, 1H), 7.25 (d,  $J = 3.4$  Hz, 1H), 7.22 (t,  $J = 7.5$  Hz, 1H), 5.27 (s, 1H), 2.46 (s, 3H), 1.31 (s, 18H);  $^{13}\text{C NMR}$  (126 MHz, Chloroform-*d*)  $\delta$  174.72, 170.32, 153.58 (d,  $J = 1.9$  Hz), 140.00 (d,  $J = 6.0$  Hz),

135.71, 133.33 (d,  $J = 8.7$  Hz), 132.30 (d,  $J = 2.8$  Hz), 132.14 (d,  $J = 2.8$  Hz), 131.90 (d,  $J = 9.1$  Hz), 129.78 (d,  $J = 98.3$  Hz), 129.04 (d,  $J = 2.1$  Hz), 128.69 (d,  $J = 100.0$  Hz), 127.99 (d,  $J = 3.5$  Hz), 127.89 (d,  $J = 3.4$  Hz), 125.47 (d,  $J = 4.9$  Hz), 125.00 (d,  $J = 4.3$  Hz), 124.61 (d,  $J = 2.2$  Hz), 123.27 (d,  $J = 4.5$  Hz), 116.03 (d,  $J = 0.6$  Hz), 62.62 (d,  $J = 54.7$  Hz), 34.51, 30.07, 26.60;  $^{31}\text{P NMR}$  (202 MHz,  $\text{CDCl}_3$ )  $\delta$

29.43; **HRMS** (ESI) Calcd. for  $C_{36}H_{38}NO_4PNa$  ( $M+Na$ )<sup>+</sup> 602.2431, Found: 602.2435; **HPLC** (Chiral IC,  $\lambda = 254$  nm, hexane/2-propanol = 10/1, Flow rate = 0.8 mL/min),  $t_R = 12.640$  min, 22.015 min.

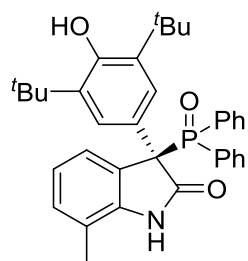

(*R*)-**3m**, white solid, 93% yield, 99:1 er; **<sup>1</sup>H NMR** (500 MHz, Chloroform-*d*)  $\delta$  9.14 (s, 1H), 7.78 (t,  $J = 9.3$  Hz, 2H), 7.58–7.46 (m, 5H), 7.36 (t,  $J = 7.0$  Hz, 3H), 7.26–7.21 (m, 3H), 7.03 (d,  $J = 7.6$  Hz, 1H), 6.95 (t,  $J = 7.6$  Hz, 1H), 5.16 (s, 1H), 2.13 (s, 3H), 1.29 (s, 18H); **<sup>13</sup>C NMR** (126 MHz, Chloroform-*d*)  $\delta$  175.76, 153.41 (d,  $J = 2.6$  Hz), 139.87 (d,  $J = 5.9$  Hz), 135.22 (d,  $J = 1.9$  Hz),

133.53 (d,  $J = 8.6$  Hz), 132.41 (d,  $J = 8.8$  Hz), 131.86 (d,  $J = 2.5$  Hz), 131.77 (d,  $J = 2.4$  Hz), 130.19 (d,  $J = 91.9$  Hz), 129.90 (d,  $J = 1.6$  Hz), 129.41 (d,  $J = 93.6$  Hz), 127.76, 127.66, 127.57, 125.99 (d,  $J = 3.7$  Hz), 125.77 (d,  $J = 4.6$  Hz), 122.67 (d,  $J = 5.2$  Hz), 122.02 (d,  $J = 1.8$  Hz), 118.90, 62.44 (d,  $J = 56.3$  Hz), 34.53, 30.11, 16.30; **<sup>31</sup>P NMR** (202 MHz,  $CDCl_3$ )  $\delta$  28.79; **HRMS** (ESI) Calcd. for  $C_{35}H_{38}NO_3PNa$  ( $M+Na$ )<sup>+</sup> 574.2482, Found: 574.2487; **HPLC** (Chiral IC,  $\lambda = 254$  nm, hexane/2-propanol = 3/1, Flow rate = 0.6 mL/min),  $t_R = 9.623$  min, 14.440 min.

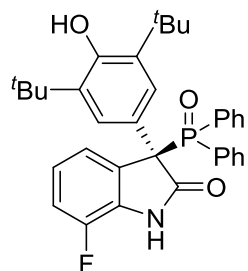

(*R*)-**3n**, white solid, 74% yield, 92:8 er; **<sup>1</sup>H NMR** (500 MHz, Chloroform-*d*)  $\delta$  8.40–8.09 (m, 1H), 7.92–7.79 (m, 2H), 7.58–7.47 (m, 5H), 7.40–7.35 (m, 4H), 7.28–7.26 (m, 1H), 7.26–7.23 (m, 1H), 7.04–6.96 (m, 2H), 5.17 (s, 1H), 1.29 (s, 18H); **<sup>13</sup>C NMR** (126 MHz, Chloroform-*d*)  $\delta$  174.90, 153.43 (d,  $J = 2.4$  Hz), 146.71 (d,  $J = 244.6$  Hz), 135.38 (d,  $J = 1.8$  Hz), 133.46 (d,  $J = 8.8$  Hz), 132.11

(d,  $J = 9.0$  Hz), 131.93 (d,  $J = 1.2$  Hz), 129.90 (d,  $J = 76.6$  Hz), 129.38 (d,  $J = 3.6$  Hz), 129.11 (d,  $J = 79.5$  Hz), 128.52 (dd,  $J = 12.7, 6.1$  Hz), 127.83, 127.73, 125.48 (d,  $J = 4.7$  Hz), 124.34 (d,  $J = 5.7$  Hz), 124.34, 122.48 (d,  $J = 4.9$  Hz), 122.43 (d,  $J = 5.5$  Hz), 115.46 (dd,  $J = 16.6, 1.3$  Hz), 62.66 (d,  $J = 57.8$  Hz), 34.49, 30.04; **<sup>31</sup>P NMR** (202 MHz,  $CDCl_3$ )  $\delta$  28.63; **<sup>19</sup>F NMR** (471 MHz,  $CDCl_3$ )  $\delta$  -134.37; **HRMS** (ESI) Calcd. for  $C_{34}H_{35}FNO_3PNa$  ( $M+Na$ )<sup>+</sup> 578.2231, Found: 574.2241; **HPLC** (Chiral IC,  $\lambda = 254$  nm, hexane/2-propanol = 3/1, Flow rate = 0.6 mL/min),  $t_R = 7.423$  min, 14.515 min.

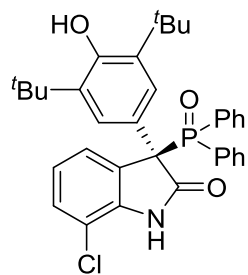

(*R*)-**3o**, white solid, 93% yield, 93.5:6.5 er; **<sup>1</sup>H NMR** (500 MHz, Chloroform-*d*)  $\delta$  7.92–7.83 (m, 2H), 7.79 (s, 1H), 7.57–7.47 (m, 6H), 7.46–7.41 (m, 1H), 7.38 (td,  $J = 7.7, 3.4$  Hz, 2H), 7.29 (td,  $J = 7.9, 3.3$  Hz, 2H), 7.21 (dt,  $J = 8.2, 1.0$  Hz, 1H), 7.03 (t,  $J = 7.9$  Hz, 1H), 5.16 (s, 1H), 1.29 (s, 18H); **<sup>13</sup>C NMR** (126 MHz, Chloroform-*d*)  $\delta$  174.39, 153.49 (d,  $J = 2.4$  Hz), 138.52 (d,  $J = 5.9$

Hz), 135.45 (d,  $J = 1.8$  Hz), 133.46 (d,  $J = 8.9$  Hz), 132.14 (d,  $J = 9.0$  Hz), 132.06 (d,  $J = 2.8$  Hz), 131.99 (d,  $J = 2.8$  Hz), 129.88 (d,  $J = 79.4$  Hz), 129.10 (d,  $J = 82.4$  Hz), 128.47 (d,  $J = 1.8$  Hz), 128.15 (d,  $J = 4.1$  Hz), 127.90 (d,  $J = 2.0$  Hz), 127.80 (d,  $J = 2.3$  Hz), 126.93 (d,  $J = 3.0$  Hz), 125.44 (d,  $J = 4.8$  Hz), 122.96 (d,  $J = 2.1$  Hz), 122.47 (d,  $J = 5.2$  Hz), 114.60, 63.34 (d,  $J = 55.4$  Hz), 34.53, 30.08; **<sup>31</sup>P NMR** (243 MHz, CDCl<sub>3</sub>)  $\delta$  28.67; **HRMS** (ESI) Calcd. for C<sub>34</sub>H<sub>35</sub>ClNO<sub>3</sub>PNa (M+Na)<sup>+</sup> 594.1935, Found: 594.1937; **HPLC** (Chiral IC,  $\lambda = 254$  nm, hexane/2-propanol = 5/1, Flow rate = 0.6 mL/min),  $t_R = 12.665$  min, 33.915 min.

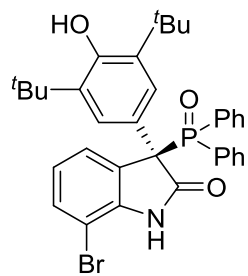

(*R*)-**3p**, white solid, 85% yield, 92:8 er; **<sup>1</sup>H NMR** (600 MHz, Chloroform-*d*)  $\delta$  7.93–7.84 (m, 2H), 7.60–7.47 (m, 7H), 7.44 (t,  $J = 7.4$  Hz, 1H), 7.38 (td,  $J = 7.6, 3.3$  Hz, 2H), 7.34 (d,  $J = 8.1$  Hz, 1H), 7.29 (td,  $J = 7.7, 3.0$  Hz, 2H), 6.97 (t,  $J = 7.9$  Hz, 1H), 5.16 (s, 1H), 1.30 (s, 18H); **<sup>13</sup>C NMR** (151 MHz, Chloroform-*d*)  $\delta$  173.84, 153.48 (d,  $J = 2.4$  Hz), 139.89 (d,  $J = 5.6$  Hz), 135.49,

133.45 (d,  $J = 8.9$  Hz), 132.09 (d,  $J = 8.3$  Hz), 132.09, 131.98 (d,  $J = 2.7$  Hz), 131.23, 129.85 (d,  $J = 94.0$  Hz), 129.19 (d,  $J = 97.3$  Hz), 128.07 (d,  $J = 4.0$  Hz), 127.91, 127.83, 127.55 (d,  $J = 3.1$  Hz), 125.39 (d,  $J = 4.8$  Hz), 123.40, 122.66 (d,  $J = 4.0$  Hz), 102.26, 63.67 (d,  $J = 54.9$  Hz), 34.53, 30.09; **<sup>31</sup>P NMR** (243 MHz, CDCl<sub>3</sub>)  $\delta$  28.81; **HRMS** (ESI) Calcd. for C<sub>34</sub>H<sub>35</sub>BrNO<sub>3</sub>PNa (M+Na)<sup>+</sup> 638.1430, Found: 638.1425; **HPLC** (Chiral AD-H,  $\lambda = 254$  nm, hexane/2-propanol = 3/1, Flow rate = 0.6 mL/min),  $t_R = 10.265$  min, 12.373 min.

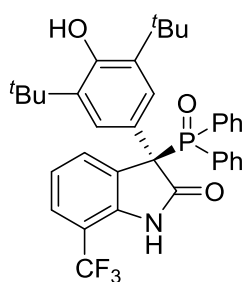

(*R*)-**3q**, white solid, 72% yield, 95:5 er;  $^1\text{H NMR}$  (600 MHz, Chloroform-*d*)  $\delta$  8.00–7.92 (m, 3H), 7.80 (s, 1H), 7.56–7.34 (m, 11H), 7.20 (t,  $J = 7.8$  Hz, 1H), 5.16 (s, 1H), 1.30 (s, 18H);  $^{13}\text{C NMR}$  (126 MHz, Chloroform-*d*)  $\delta$  174.95, 153.51 (d,  $J = 2.2$  Hz), 137.84, 135.65 (d,  $J = 1.6$  Hz), 133.44 (d,  $J = 9.1$  Hz), 132.18, 132.14 (d,  $J = 2.9$  Hz), 132.05 (d,  $J = 2.8$  Hz), 131.81 (d,  $J = 8.9$  Hz), 129.74 (d,  $J = 65.6$  Hz), 128.95 (d,  $J = 69.5$  Hz), 128.62, 128.59, 127.95 (d,  $J = 8.0$  Hz), 127.85 (d,  $J = 7.7$  Hz), 125.32 (d,  $J = 4.9$  Hz), 123.64 (q,  $J = 272.2$  Hz), 122.67 (d,  $J = 5.0$  Hz), 122.05 (d,  $J = 2.0$  Hz), 111.62 (q,  $J = 30.0$  Hz), 61.82 (d,  $J = 54.3$  Hz), 34.52, 30.06;  $^{31}\text{P NMR}$  (243 MHz,  $\text{CDCl}_3$ )  $\delta$  28.84;  $^{19}\text{F NMR}$  (471 MHz,  $\text{CDCl}_3$ )  $\delta$  -61.01; **HRMS** (ESI) Calcd. for  $\text{C}_{35}\text{H}_{35}\text{F}_3\text{BrNO}_3\text{PNa}$  ( $\text{M}+\text{Na}$ ) $^+$  628.2199, Found: 628.2189; **HPLC** (Chiral IC,  $\lambda = 254$  nm, hexane/2-propanol = 5/1, Flow rate = 0.6 mL/min),  $t_R = 8.657$  min, 10.782 min.

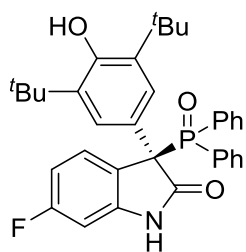

(*R*)-**3r**, white solid, 73% yield, 85.5:14.5 er;  $^1\text{H NMR}$  (600 MHz, Chloroform-*d*)  $\delta$  7.85 (dd,  $J = 11.2, 7.9$  Hz, 2H), 7.76 (s, 1H), 7.56 (dd,  $J = 10.9, 8.1$  Hz, 2H), 7.53–7.46 (m, 4H), 7.43 (t,  $J = 7.4$  Hz, 1H), 7.39 (td,  $J = 7.5, 2.9$  Hz, 2H), 7.29 (td,  $J = 7.7, 2.9$  Hz, 2H), 6.74 (td,  $J = 9.0, 1.9$  Hz, 1H), 6.43 (dd,  $J = 8.3, 1.7$  Hz, 1H), 5.16 (s, 1H), 1.29 (s, 18H);  $^{13}\text{C NMR}$  (126 MHz, Chloroform-*d*)  $\delta$  175.20, 163.09 (dd,  $J = 246.9, 2.1$  Hz), 153.49 (d,  $J = 2.6$  Hz), 142.78 (dd,  $J = 12.2, 6.1$  Hz), 135.35 (d,  $J = 1.9$  Hz), 133.34 (d,  $J = 8.6$  Hz), 132.49 (d,  $J = 9.0$  Hz), 132.05 (d,  $J = 2.7$  Hz), 131.93 (d,  $J = 2.6$  Hz), 129.90 (d,  $J = 73.7$  Hz), 129.51 (d,  $J = 2.6$  Hz), 129.12 (d,  $J = 75.8$  Hz), 127.94 (d,  $J = 2.4$  Hz), 127.84 (d,  $J = 2.4$  Hz), 125.59 (d,  $J = 4.7$  Hz), 122.49 (d,  $J = 4.6$  Hz), 121.82 (dd,  $J = 3.6, 3.0$  Hz), 108.36 (dd,  $J = 22.4, 2.0$  Hz), 98.20 (d,  $J = 27.5$  Hz), 61.61 (d,  $J = 56.9$  Hz), 34.52, 30.07;  $^{31}\text{P NMR}$  (202 MHz,  $\text{CDCl}_3$ )  $\delta$  29.39;  $^{19}\text{F NMR}$  (471 MHz,  $\text{CDCl}_3$ )  $\delta$  -111.39 (d,  $J = 3.5$  Hz); **HRMS** (ESI) Calcd. for  $\text{C}_{34}\text{H}_{35}\text{FNO}_3\text{PNa}$  ( $\text{M}+\text{Na}$ ) $^+$  578.2231, Found: 574.2231; **HPLC** (Chiral AD-H,  $\lambda = 254$  nm, hexane/ethanol = 5/1, Flow rate = 0.6 mL/min),  $t_R = 12.765$  min, 28.232 min.

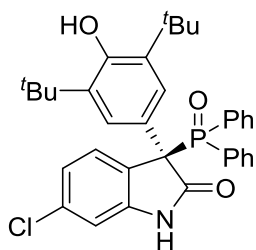

(*R*)-**3s**, white solid, 97% yield, 89.5:10.5 er;  $^1\text{H NMR}$  (600 MHz, Chloroform-*d*)  $\delta$  8.01 (s, 1H), 7.83 (dd,  $J = 10.3, 8.4$  Hz, 2H), 7.58 (dd,  $J = 10.7, 7.4$  Hz, 2H), 7.51 (t,  $J = 7.4$  Hz, 1H), 7.46 (d,  $J = 1.4$  Hz, 2H), 7.45–7.36 (m, 4H), 7.30 (td,  $J = 7.7, 3.1$  Hz, 2H), 7.01 (dd,  $J = 8.2, 1.7$  Hz, 1H), 6.70 (d,  $J = 1.5$  Hz, 1H), 5.17 (s, 1H), 1.29 (s, 18H);  $^{13}\text{C NMR}$  (126 MHz, Chloroform-*d* + DMSO-*d*<sub>6</sub>)  $\delta$  174.44, 152.88 (d,  $J = 2.3$  Hz), 142.82 (d,  $J = 5.9$  Hz), 135.34, 133.76 (d,  $J = 2.4$  Hz), 132.81 (d,  $J = 8.7$  Hz), 132.81 (d,  $J = 8.9$  Hz), 131.41, 129.77 (d,  $J = 97.4$  Hz), 129.33 (d,  $J = 100.1$  Hz), 128.62 (d,  $J = 3.0$  Hz), 127.38 (d,  $J = 5.1$  Hz), 127.29 (d,  $J = 5.3$  Hz), 124.87 (d,  $J = 4.8$  Hz), 124.73 (d,  $J = 4.1$  Hz), 122.50 (d,  $J = 5.1$  Hz), 120.86 (d,  $J = 2.0$  Hz), 109.70, 61.28 (d,  $J = 57.4$  Hz), 34.06, 29.62;  $^{31}\text{P NMR}$  (243 MHz, CDCl<sub>3</sub>)  $\delta$  28.95; **HRMS** (ESI) Calcd. for C<sub>34</sub>H<sub>35</sub>ClNO<sub>3</sub>PNa (M+Na)<sup>+</sup> 594.1935, Found: 594.1926; **HPLC** (Chiral AD-H,  $\lambda = 254$  nm, hexane/ethanol = 5/1, Flow rate = 0.6 mL/min),  $t_R = 14.077$  min, 34.832 min.

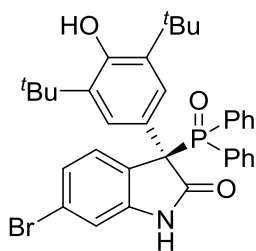

(*R*)-**3t**, white solid, 96% yield, 82.5:17.5 er;  $^1\text{H NMR}$  (600 MHz, Chloroform-*d*)  $\delta$  7.92 (s, 1H), 7.83 (dd,  $J = 10.7, 8.2$  Hz, 2H), 7.58 (dd,  $J = 11.0, 8.0$  Hz, 2H), 7.51 (t,  $J = 7.3$  Hz, 1H), 7.46 (s, 2H), 7.43 (t,  $J = 7.5$  Hz, 1H), 7.39 (td,  $J = 7.7, 3.2$  Hz, 2H), 7.35 (d,  $J = 7.9$  Hz, 1H), 7.30 (td,  $J = 7.7, 3.1$  Hz, 2H), 7.17 (dd,  $J = 8.1, 1.1$  Hz, 1H), 6.86 (s, 1H), 5.17 (s, 1H), 1.29 (s, 18H);  $^{13}\text{C NMR}$  (126 MHz, Chloroform-*d* + DMSO-*d*<sub>6</sub>)  $\delta$  174.48, 153.00 (d,  $J = 1.8$  Hz), 143.05 (d,  $J = 6.2$  Hz), 135.32, 132.97 (d,  $J = 8.7$  Hz), 131.84 (d,  $J = 8.9$  Hz), 131.52 (d,  $J = 2.0$  Hz), 129.91 (d,  $J = 97.4$  Hz), 129.12, 129.10, 129.05 (d,  $J = 100.3$  Hz), 127.51 (d,  $J = 6.1$  Hz), 127.42 (d,  $J = 6.3$  Hz), 125.45 (d,  $J = 4.0$  Hz), 125.02 (d,  $J = 4.6$  Hz), 123.96, 122.61 (d,  $J = 5.1$  Hz), 121.94 (d,  $J = 1.8$  Hz), 112.64, 61.53 (d,  $J = 57.3$  Hz), 34.18, 29.76;  $^{31}\text{P NMR}$  (202 MHz, CDCl<sub>3</sub>)  $\delta$  29.00; **HRMS** (ESI) Calcd. for C<sub>34</sub>H<sub>35</sub>BrNO<sub>3</sub>PNa (M+Na)<sup>+</sup> 638.1430, Found: 638.1436; **HPLC** (Chiral AD-H,  $\lambda = 254$  nm, hexane/ethanol = 3/1, Flow rate = 0.6 mL/min),  $t_R = 9.523$  min, 19.832 min.

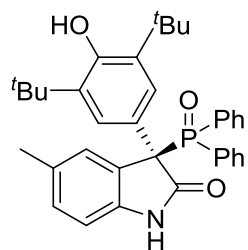

(*R*)-**3u**, white solid, 75% yield, 88:12 er; **<sup>1</sup>H NMR** (600 MHz, Chloroform-*d*)  $\delta$  7.88 (t,  $J = 9.3$  Hz, 2H), 7.57–7.45 (m, 6H), 7.42–7.34 (m, 4H), 7.26–7.23 (m, 2H), 7.01 (d,  $J = 7.8$  Hz, 1H), 6.58 (d,  $J = 7.9$  Hz, 1H), 5.13 (s, 1H), 2.31 (s, 3H), 1.30 (s, 18H); **<sup>13</sup>C NMR** (126 MHz, Chloroform-*d* + DMSO-*d*<sub>6</sub>)  $\delta$  174.34, 152.63 (d,  $J = 2.2$  Hz), 138.98 (d,  $J = 6.1$  Hz), 135.14 ( $J = 1.5$  Hz), 132.86 (d,  $J = 8.6$  Hz), 131.63 (d,  $J = 8.9$  Hz), 131.11, 130.16 (d,  $J = 97.5$  Hz), 130.06 (d,  $J = 2.0$  Hz), 129.17 (d,  $J = 99.7$  Hz), 128.54 (d,  $J = 2.6$  Hz), 128.37, 127.15, 127.05, 126.05 (d,  $J = 3.9$  Hz), 124.98 (d,  $J = 4.8$  Hz), 123.10 (d,  $J = 5.2$  Hz), 108.76, 61.46 (d,  $J = 57.5$  Hz), 34.00, 29.58, 20.75; **<sup>31</sup>P NMR** (243 MHz, CDCl<sub>3</sub>)  $\delta$  28.85; **HRMS** (ESI) Calcd. for C<sub>35</sub>H<sub>38</sub>NO<sub>3</sub>PNa (M+Na)<sup>+</sup> 574.2482, Found: 574.2484; **HPLC** (Chiral IC,  $\lambda = 254$  nm, hexane/ethanol = 5/1, Flow rate = 0.6 mL/min),  $t_R = 8.248$  min, 23.748 min.

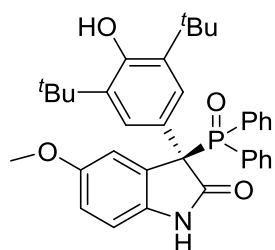

(*R*)-**3v**, white solid, 94% yield, 85:15 er; **<sup>1</sup>H NMR** (500 MHz, Chloroform-*d*)  $\delta$  8.21 (s, 1H), 7.83 (dd,  $J = 10.7, 7.7$  Hz, 2H), 7.61–7.52 (m, 4H), 7.49 (td,  $J = 7.5, 1.0$  Hz, 1H), 7.38 (td,  $J = 7.7, 3.0$  Hz, 3H), 7.24 (dd,  $J = 7.6, 3.1$  Hz, 2H), 7.09 (s, 1H), 6.79–6.72 (m, 1H), 6.59 (d,  $J = 8.5$  Hz, 1H), 5.17 (s, 1H), 3.70 (s, 3H), 1.30 (s, 18H); **<sup>13</sup>C NMR** (126 MHz, Chloroform-*d*)  $\delta$  175.07, 154.95 (d,  $J = 2.3$  Hz), 153.37 (d,  $J = 2.5$  Hz), 135.21 (d,  $J = 1.8$  Hz), 134.80 (d,  $J = 6.2$  Hz), 133.45 (d,  $J = 8.6$  Hz), 132.34 (d,  $J = 9.0$  Hz), 131.86 (d,  $J = 2.6$  Hz), 131.77 (d,  $J = 2.6$  Hz), 130.12 (d,  $J = 82.6$  Hz), 129.34 (d,  $J = 84.2$  Hz), 127.82 (d,  $J = 6.7$  Hz), 127.73 (d,  $J = 6.7$  Hz), 127.30 (d,  $J = 4.2$  Hz), 125.65 (d,  $J = 4.7$  Hz), 122.64 (d,  $J = 5.2$  Hz), 115.34 (d,  $J = 1.7$  Hz), 114.03 (d,  $J = 2.9$  Hz), 110.22, 62.27 (d,  $J = 56.8$  Hz), 55.67, 34.51, 30.10; **<sup>31</sup>P NMR** (243 MHz, CDCl<sub>3</sub>)  $\delta$  28.78; **HRMS** (ESI) Calcd. for C<sub>35</sub>H<sub>38</sub>NO<sub>4</sub>PNa (M+Na)<sup>+</sup> 590.2431, Found: 590.2426; **HPLC** (Chiral IC,  $\lambda = 254$  nm, hexane/ethanol = 3/1, Flow rate = 0.6 mL/min),  $t_R = 6.898$  min, 14.348 min.



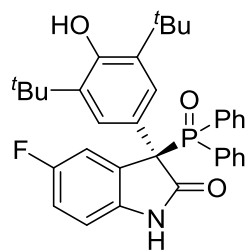

(*R*)-**3w**, white solid, 90% yield, 88.5:11.5 er;  $^1\text{H NMR}$  (500 MHz,  $\text{DMSO-}d_6$ )  $\delta$  10.83 (s, 1H), 7.88–7.80 (m, 2H), 7.61–7.54 (m, 1H), 7.53–7.48 (m, 1H), 7.48–7.40 (m, 4H), 7.40–7.34 (m, 4H), 7.20 (d,  $J = 8.9$  Hz, 1H), 7.11–7.03 (m, 1H), 7.00 (s, 1H), 6.71 (dd,  $J = 8.6, 4.6$  Hz, 1H), 1.21 (s, 18H);  $^{13}\text{C NMR}$  (126 MHz,  $\text{Chloroform-}d + \text{DMSO-}d_6$ )  $\delta$  174.80, 158.08 (dd,  $J = 239.6, 2.3$  Hz), 153.16 (d,  $J = 2.3$  Hz), 137.49 (d,  $J = 5.4$  Hz), 135.41, 133.18 (d,  $J = 8.8$  Hz), 131.99 (d,  $J = 9.0$  Hz), 131.70, 131.68 (d,  $J = 4.6$  Hz), 130.00 (d,  $J = 97.7$  Hz), 129.16 (d,  $J = 100.8$  Hz), 128.20 (dd,  $J = 8.2, 4.1$  Hz), 127.68, 127.58, 125.15 (d,  $J = 4.9$  Hz), 123.01 (d,  $J = 5.1$  Hz), 115.92 (d,  $J = 26.5$  Hz), 114.91 (d,  $J = 24.3$  Hz), 109.74 (d,  $J = 7.6$  Hz), 62.40 (d,  $J = 56.6$  Hz), 34.33, 29.90;  $^{31}\text{P NMR}$  (243 MHz,  $\text{CDCl}_3$ )  $\delta$  28.96;  $^{19}\text{F NMR}$  (565 MHz,  $\text{CDCl}_3$ )  $\delta$  -119.86; **HRMS** (ESI) Calcd. for  $\text{C}_{34}\text{H}_{35}\text{FNO}_3\text{PNa}$  ( $\text{M}+\text{Na}$ ) $^+$  578.2231, Found: 574.2239; **HPLC** (Chiral AD-H,  $\lambda = 254$  nm, hexane/ethanol = 5/1, Flow rate = 0.6 mL/min),  $t_R = 14.640$  min, 37.048 min.

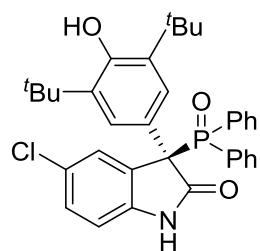

(*R*)-**3x**, white solid, 82% yield, 88:12 er;  $^1\text{H NMR}$  (600 MHz,  $\text{Chloroform-}d$ )  $\delta$  7.90–7.81 (m, 3H), 7.58 (dd,  $J = 11.0, 8.0$  Hz, 2H), 7.51 (t,  $J = 7.4$  Hz, 1H), 7.49–7.37 (m, 6H), 7.29 (td,  $J = 7.5, 2.7$  Hz, 2H), 7.17 (d,  $J = 8.3$  Hz, 1H), 6.61 (d,  $J = 8.3$  Hz, 1H), 5.18 (s, 1H), 1.30 (s, 18H);  $^{13}\text{C NMR}$  (126 MHz,  $\text{Chloroform-}d$ )  $\delta$  174.65, 153.52 (d,  $J = 2.4$  Hz), 139.58 (d,  $J = 6.1$  Hz), 135.49 (d,  $J = 1.8$  Hz), 133.37 (d,  $J = 8.7$  Hz), 132.46 (d,  $J = 9.0$  Hz), 132.10 (d,  $J = 2.7$  Hz), 132.02 (d,  $J = 2.6$  Hz), 129.77 (d,  $J = 90.9$  Hz), 128.97 (d,  $J = 94.7$  Hz), 128.73 (d,  $J = 3.1$  Hz), 128.61, 128.31 (d,  $J = 4.2$  Hz), 127.96, 127.86, 127.32 (d,  $J = 2.7$  Hz), 125.45 (d,  $J = 4.8$  Hz), 122.48 (d,  $J = 4.7$  Hz), 110.36, 62.45 (d,  $J = 55.9$  Hz), 34.53, 30.06;  $^{31}\text{P NMR}$  (243 MHz,  $\text{CDCl}_3$ )  $\delta$  29.09; **HRMS** (ESI) Calcd. for  $\text{C}_{34}\text{H}_{35}\text{ClNO}_3\text{PNa}$  ( $\text{M}+\text{Na}$ ) $^+$  594.1935, Found: 594.1929; **HPLC** (Chiral AD-H,  $\lambda = 254$  nm, hexane/ethanol = 5/1, Flow rate = 0.6 mL/min),  $t_R = 13.132$  min, 44.675 min.

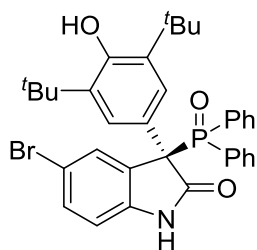

(*R*)-**3y**, white solid, 87% yield, 81:19 er; **<sup>1</sup>H NMR** (500 MHz, Chloroform-*d*)  $\delta$  8.59 (s, 1H), 7.78 (dd, *J* = 10.7, 8.1 Hz, 2H), 7.60 (dd, *J* = 11.2, 7.9 Hz, 2H), 7.53 (t, *J* = 7.3 Hz, 1H), 7.45 (d, *J* = 1.0 Hz, 2H), 7.40 (m, 4H), 7.32–7.27 (m, 3H), 6.56 (d, *J* = 8.2 Hz, 1H), 5.20 (s, 1H), 1.29 (s, 18H); **<sup>13</sup>C NMR** (126 MHz, Chloroform-*d* + DMSO-*d*<sub>6</sub>)  $\delta$  173.82, 152.67 (d, *J* = 2.2 Hz), 140.49 (d, *J* = 6.0 Hz), 135.53 (d, *J* = 1.5 Hz), 132.53 (d, *J* = 8.7 Hz), 131.40 (d, *J* = 7.6 Hz), 131.25 (d, *J* = 10.5 Hz), 130.55 (d, *J* = 8.3 Hz), 130.37 (d, *J* = 9.2 Hz), 129.44 (d, *J* = 97.5 Hz), 128.55 (d, *J* = 96.9 Hz), 128.14, 127.07 (m), 124.54 (d, *J* = 4.9 Hz), 124.46 (d, *J* = 4.8 Hz), 122.31 (d, *J* = 5.0 Hz), 112.99 (d, *J* = 2.7 Hz), 110.41, 61.56 (d, *J* = 57.0 Hz), 33.85, 29.36; **<sup>31</sup>P NMR** (243 MHz, CDCl<sub>3</sub>)  $\delta$  29.10; **HRMS** (ESI) Calcd. for C<sub>34</sub>H<sub>35</sub>BrNO<sub>3</sub>PNa (M+Na)<sup>+</sup> 638.1430, Found: 638.1426; **HPLC** (Chiral IC,  $\lambda$  = 254 nm, hexane/ethanol = 3/1, Flow rate = 0.6 mL/min), *t<sub>R</sub>* = 6.182 min, 9.198 min.

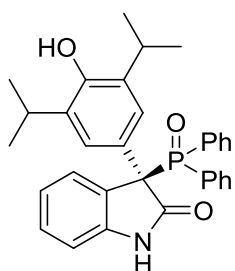

(*R*)-**3z**, white solid, 91% yield, 91:9 er; **<sup>1</sup>H NMR** (500 MHz, DMSO-*d*<sub>6</sub>)  $\delta$  10.73 (s, 1H), 8.09 (s, 1H), 7.88 (t, *J* = 8.5 Hz, 2H), 7.54 (t, *J* = 7.2 Hz, 1H), 7.51–7.41 (m, 4H), 7.38–7.27 (m, 6H), 7.21 (t, *J* = 7.6 Hz, 1H), 7.03 (t, *J* = 7.6 Hz, 1H), 6.70 (d, *J* = 7.7 Hz, 1H), 3.17 (hept, *J* = 6.7 Hz, 2H), 0.97 (t, *J* = 6.2 Hz, 12H); **<sup>13</sup>C NMR** (126 MHz, DMSO-*d*<sub>6</sub>)  $\delta$  174.44, 149.97 (d, *J* = 1.6 Hz), 141.92 (d, *J* = 6.1 Hz), 134.67, 132.87 (d, *J* = 8.6 Hz), 131.88, 131.44 (d, *J* = 8.7 Hz), 130.86 (d, *J* = 76.6 Hz), 130.25 (d, *J* = 11.5 Hz), 130.08 (d, *J* = 79.0 Hz), 128.98 (d, *J* = 12.5 Hz), 128.74, 127.94 (d, *J* = 8.5 Hz), 127.85 (d, *J* = 8.0 Hz), 126.67 (d, *J* = 3.9 Hz), 124.64 (d, *J* = 5.0 Hz), 123.07 (d, *J* = 5.0 Hz), 121.14, 109.36, 61.76 (d, *J* = 56.9 Hz), 26.14, 22.84, 22.77; **<sup>31</sup>P NMR** (202 MHz, DMSO-*d*<sub>6</sub>)  $\delta$  27.57; **HRMS** (ESI) Calcd. for C<sub>32</sub>H<sub>32</sub>NO<sub>3</sub>PNa (M+Na)<sup>+</sup> 532.2012, Found: 532.2021; **HPLC** (Chiral IC,  $\lambda$  = 254 nm, hexane/2-propanol = 3/1, Flow rate = 0.6 mL/min), *t<sub>R</sub>* = 6.973 min, 19.290 min.

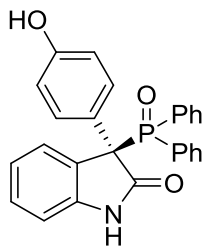

(*R*)-**4**, white solid, 82% yield, 92.5:7.5 er; **<sup>1</sup>H NMR** (500 MHz, DMSO-*d*<sub>6</sub>) δ 10.74 (s, 1H), 9.77 (s, 1H), 7.85–7.76 (m, 2H), 7.56–7.43 (m, 5H), 7.40 (td, *J* = 7.9, 3.2 Hz, 2H), 7.32–7.16 (m, 5H), 7.00 (t, *J* = 7.6, 0.7 Hz, 1H), 6.70–6.64 (m, 3H); **<sup>13</sup>C NMR** (126 MHz, DMSO-*d*<sub>6</sub>) δ 174.96, 157.13, 142.04 (d, *J* = 6.0 Hz), 133.35 (d, *J* = 9.0 Hz), 132.93 (d, *J* = 1.7 Hz), 132.85 (d, *J* = 2.0 Hz), 131.92 (d, *J* = 8.9 Hz), 130.44 (d, *J* = 71.9 Hz), 129.65 (d, *J* = 73.8 Hz), 129.65 (d, *J* = 5.0 Hz), 129.55, 128.64 (d, *J* = 12.0 Hz), 128.52 (d, *J* = 11.8 Hz), 128.23 (d, *J* = 2.4 Hz), 127.18 (d, *J* = 3.8 Hz), 125.21 (d, *J* = 5.0 Hz), 122.26, 115.82, 110.08, 61.74 (d, *J* = 57.7 Hz); **<sup>31</sup>P NMR** (243 MHz, DMSO-*d*<sub>6</sub>) δ 28.29; **HRMS** (ESI) Calcd. for C<sub>26</sub>H<sub>20</sub>NO<sub>3</sub>PNa (M+Na)<sup>+</sup> 448.1073, Found: 448.1072; **HPLC** (Chiral IC, λ = 254 nm, hexane/2-propanol = 3/1, Flow rate = 0.6 mL/min), *t<sub>R</sub>* = 14.023 min, 16.482 min.

Single Crystal X-ray Structure Determinations of Compound (*R*)-31 (CCDC:

2019323)

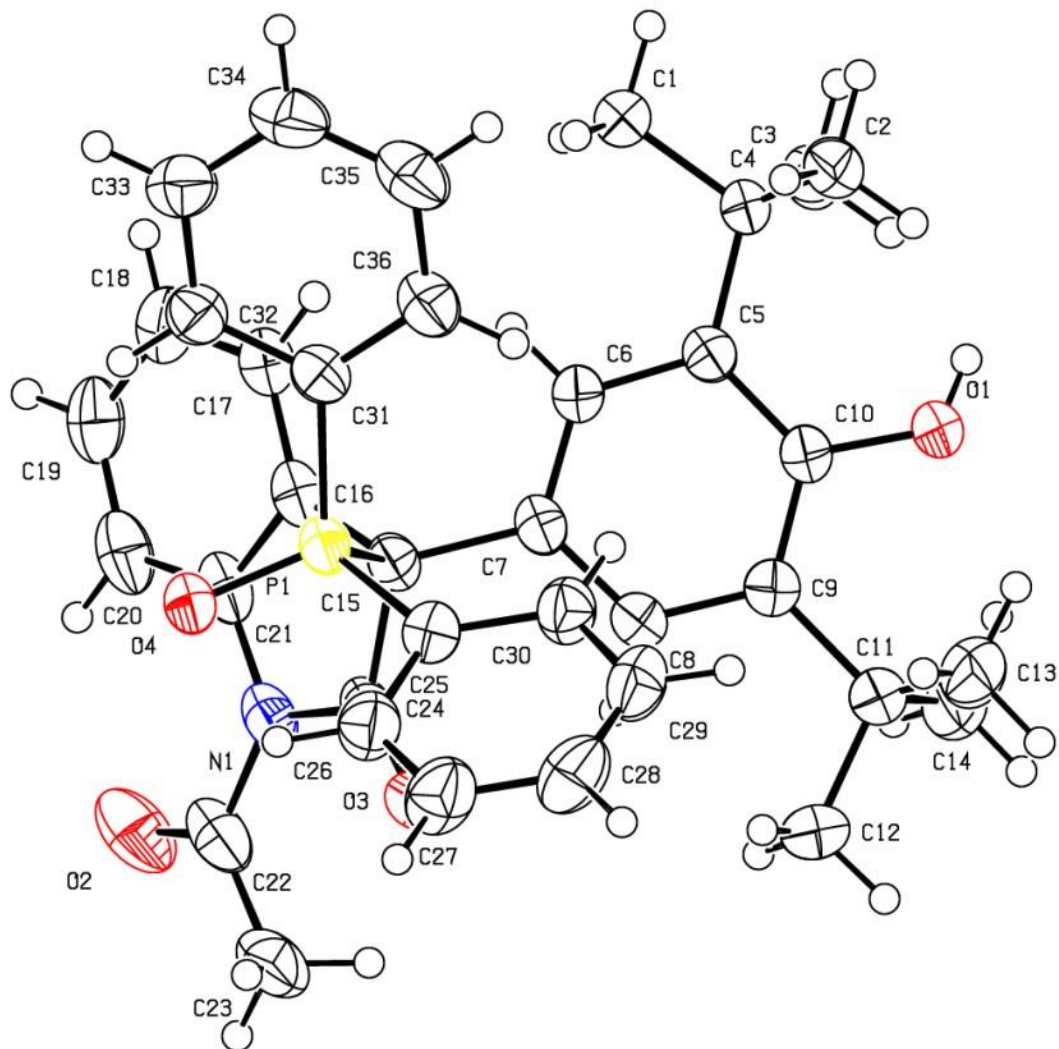

Cell: a=9.8737(2) b=15.5010(3) c=20.4589(4)  
 alpha=90 beta=90 gamma=90

Temperature: 150 K

|                                     | Calculated                                         | Reported                                           |
|-------------------------------------|----------------------------------------------------|----------------------------------------------------|
| Volume                              | 3131.28(11)                                        | 3131.28(11)                                        |
| Space group                         | P 21 21 21                                         | P 21 21 21                                         |
| Hall group                          | P 2ac 2ab                                          | P 2ac 2ab                                          |
| Moiety formula                      | C <sub>36</sub> H <sub>38</sub> N O <sub>4</sub> P | C <sub>36</sub> H <sub>38</sub> N O <sub>4</sub> P |
| Sum formula                         | C <sub>36</sub> H <sub>38</sub> N O <sub>4</sub> P | C <sub>36</sub> H <sub>38</sub> N O <sub>4</sub> P |
| Mr                                  | 579.64                                             | 579.64                                             |
| D <sub>x</sub> , g cm <sup>-3</sup> | 1.230                                              | 1.230                                              |
| Z                                   | 4                                                  | 4                                                  |

|           |             |             |
|-----------|-------------|-------------|
| Mu (mm-1) | 1.090       | 1.090       |
| F000      | 1232.0      | 1232.0      |
| F000'     | 1236.55     |             |
| h,k,lmax  | 12,19,25    | 12,19,25    |
| Nref      | 6414[ 3606] | 6348        |
| Tmin,Tmax | 0.761,0.858 | 0.064,0.174 |
| Tmin'     | 0.761       |             |

Correction method= # Reported T Limits: Tmin=0.064 Tmax=0.174 AbsCorr = MULTI-SCAN

Data completeness= 1.76/0.99

Theta(max)= 74.502

R(reflections)= 0.0307( 6181)

wR2(reflections)= 0.0858( 6348)

S = 1.050

Npar= 391

<sup>1</sup>H NMR, <sup>13</sup>C NMR, <sup>31</sup>P NMR, <sup>19</sup>F NMR and HPLC spectra for products

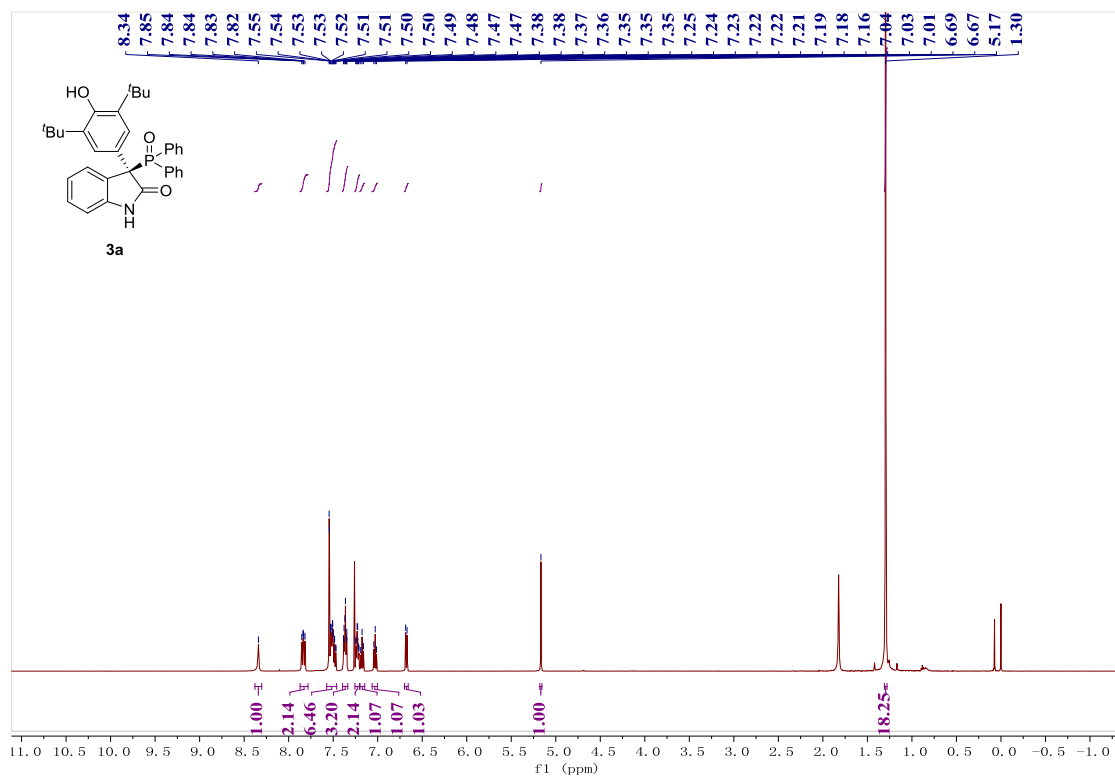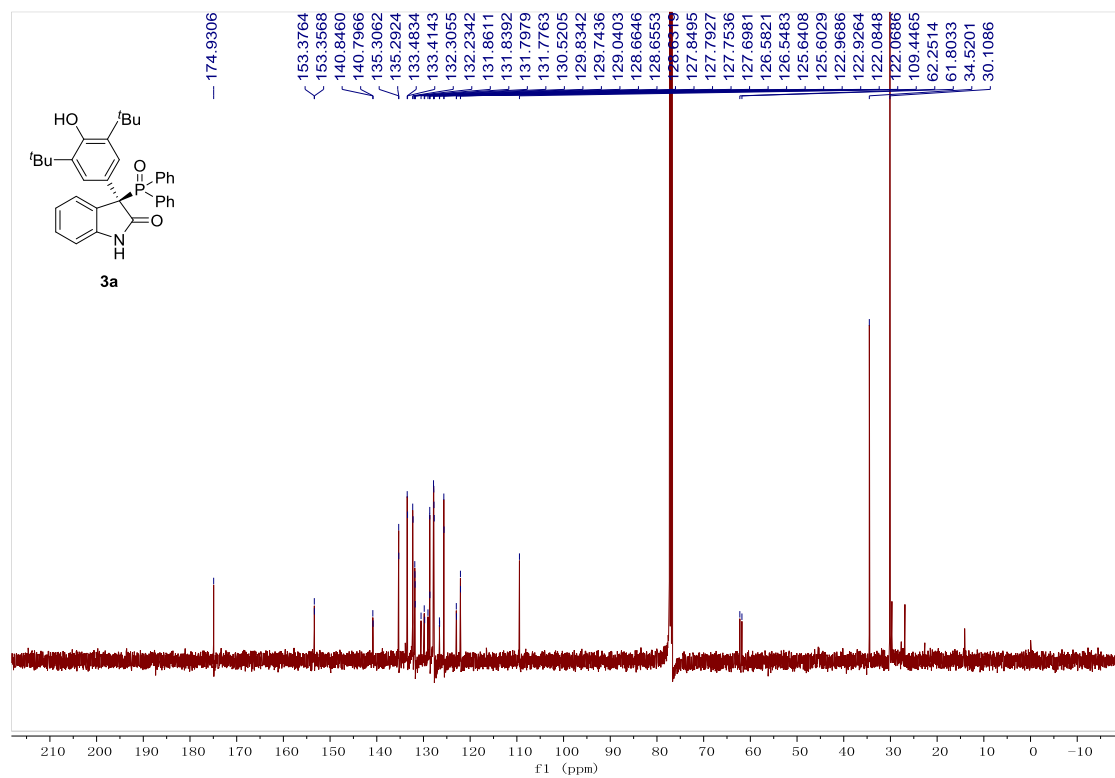

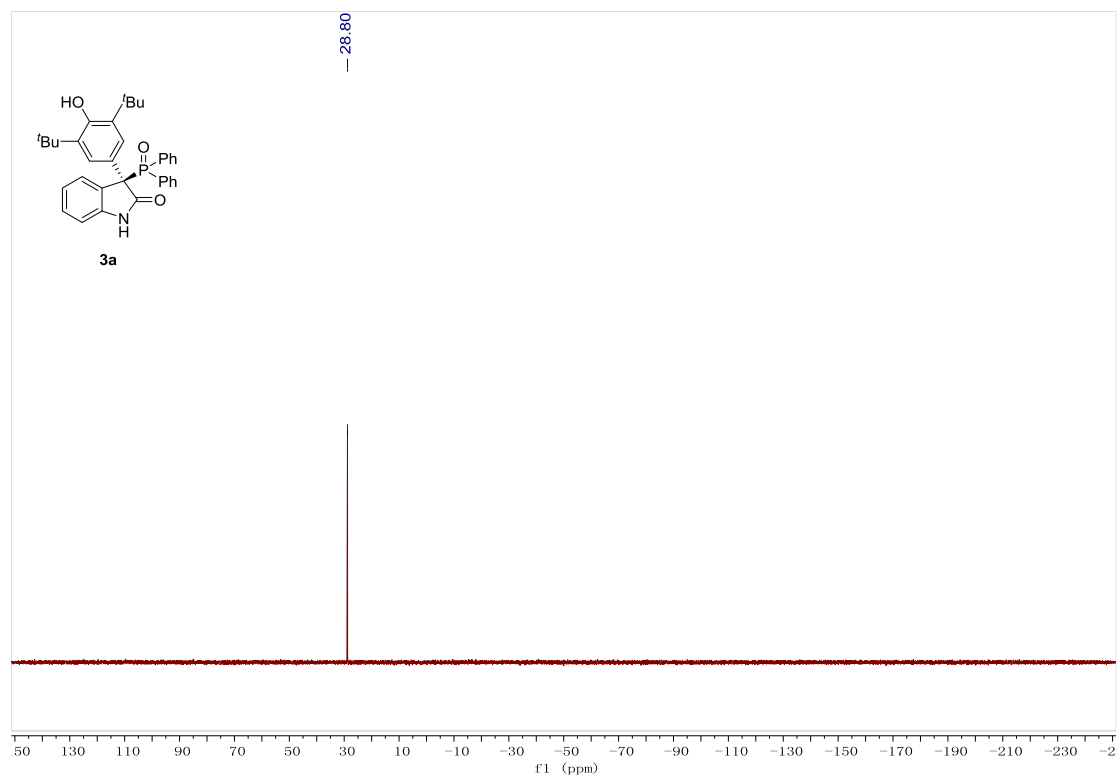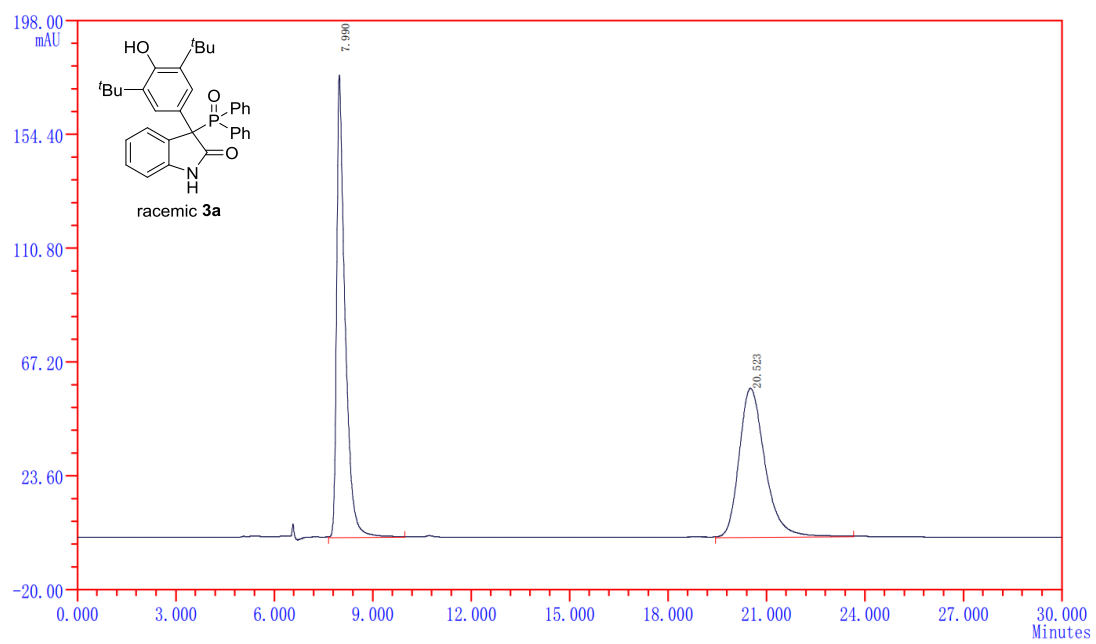

| Peak # | RetTime [Min] | Height [mAu] | Area [mAu*s] | Area %   |
|--------|---------------|--------------|--------------|----------|
| 1      | 7.990         | 177.09       | 3151.109     | 50.056   |
| 2      | 20.523        | 57.17        | 3144.086     | 49.944   |
| Total: |               | 234.26       | 6295.195     | 100.0000 |

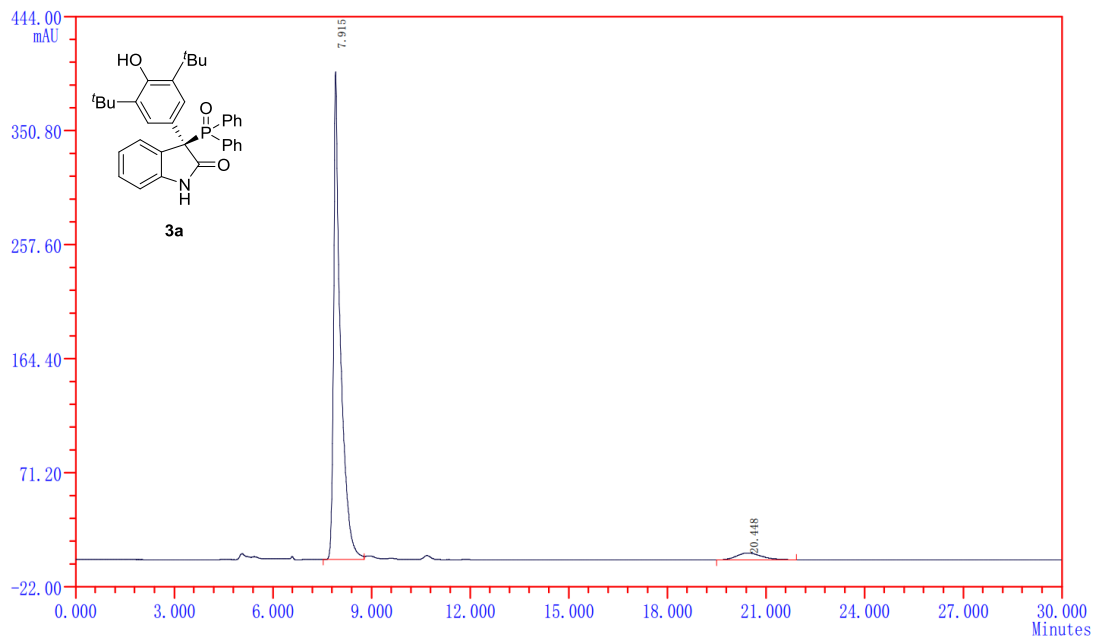

| Peak # | RetTime [Min] | Height [mAu] | Area [mAu*s] | Area %   |
|--------|---------------|--------------|--------------|----------|
| 1      | 7.915         | 398.55       | 5782.499     | 95.077   |
| 2      | 20.448        | 5.70         | 299.420      | 4.923    |
| Total: |               | 404.25       | 6081.919     | 100.0000 |

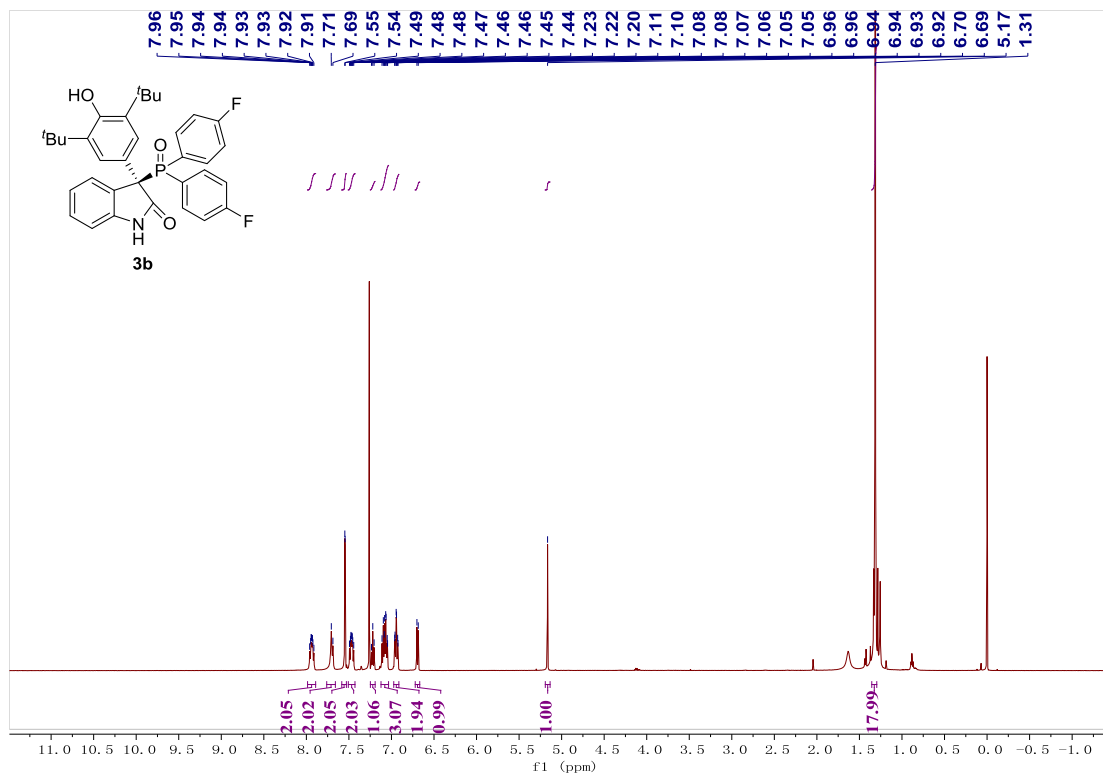



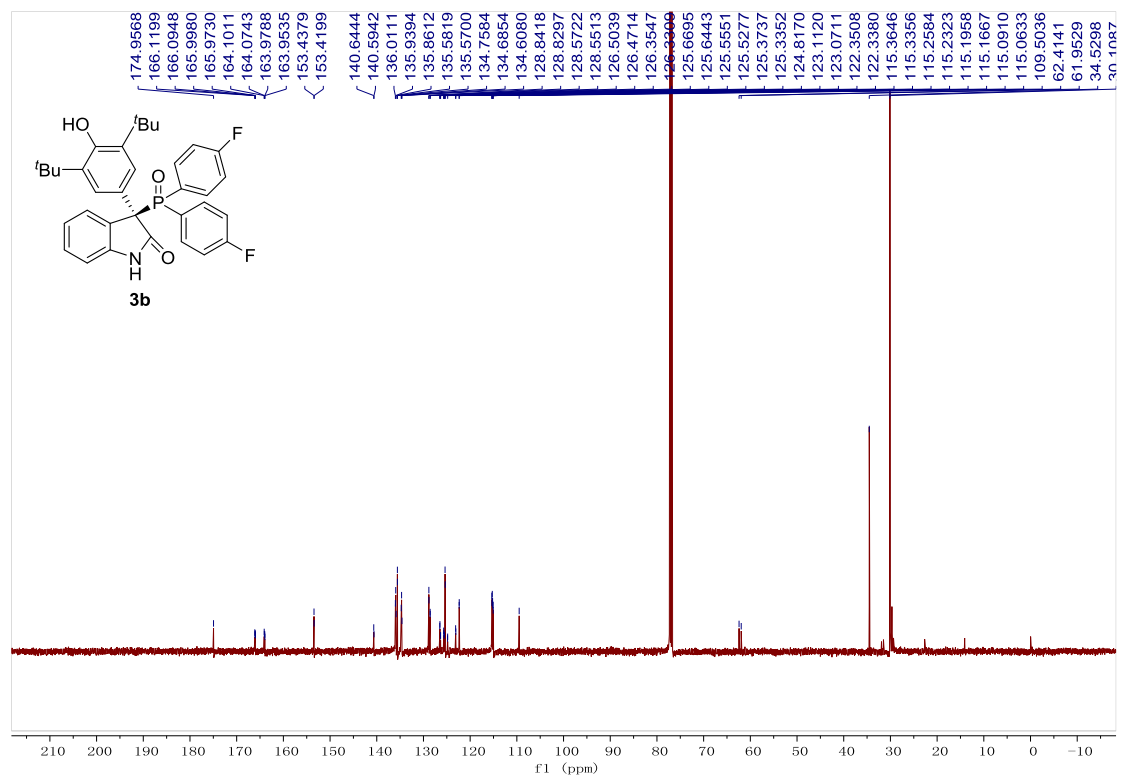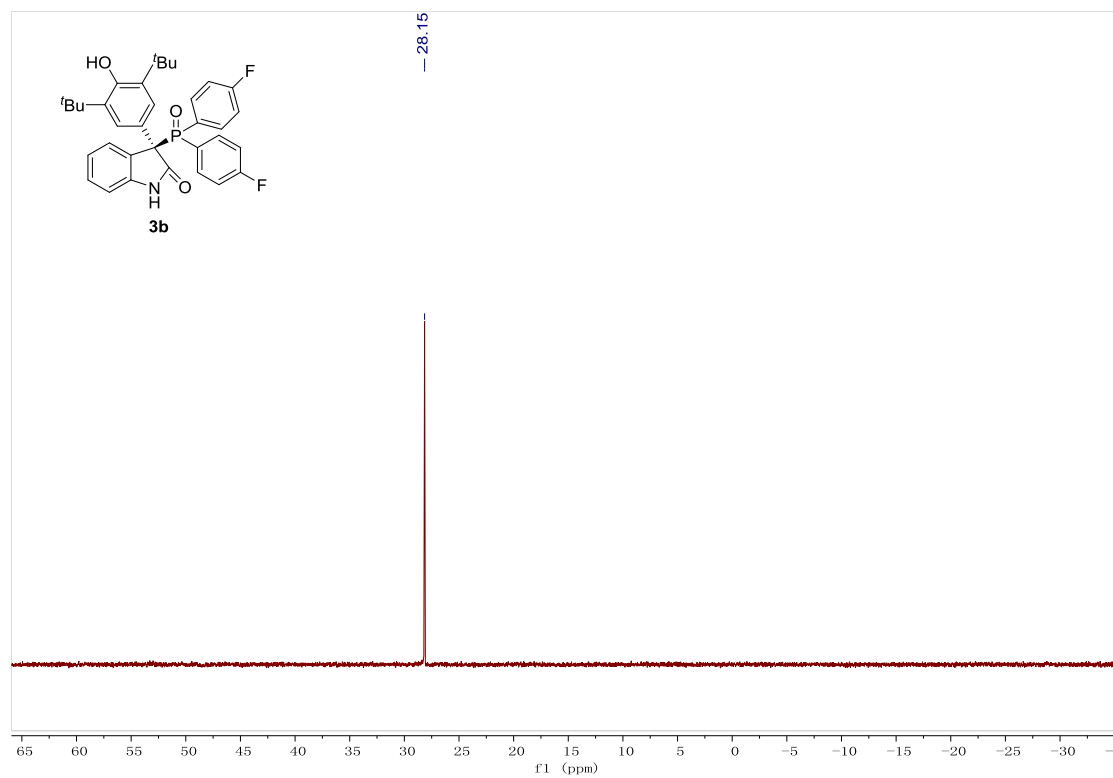

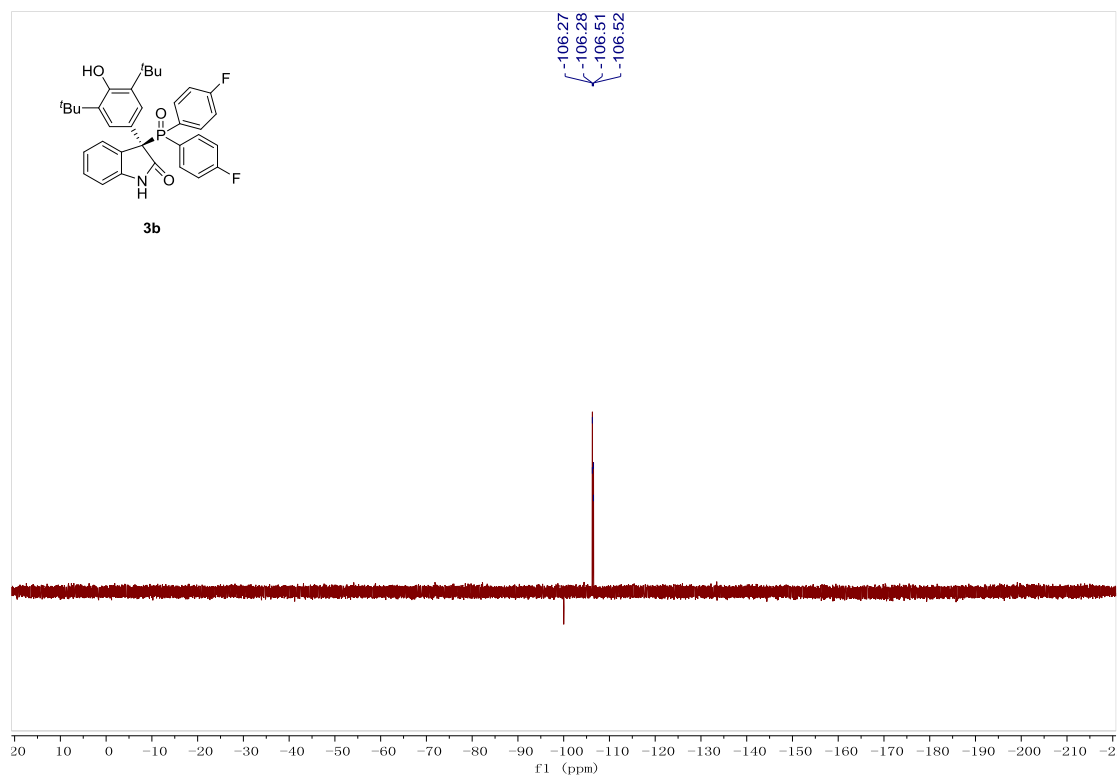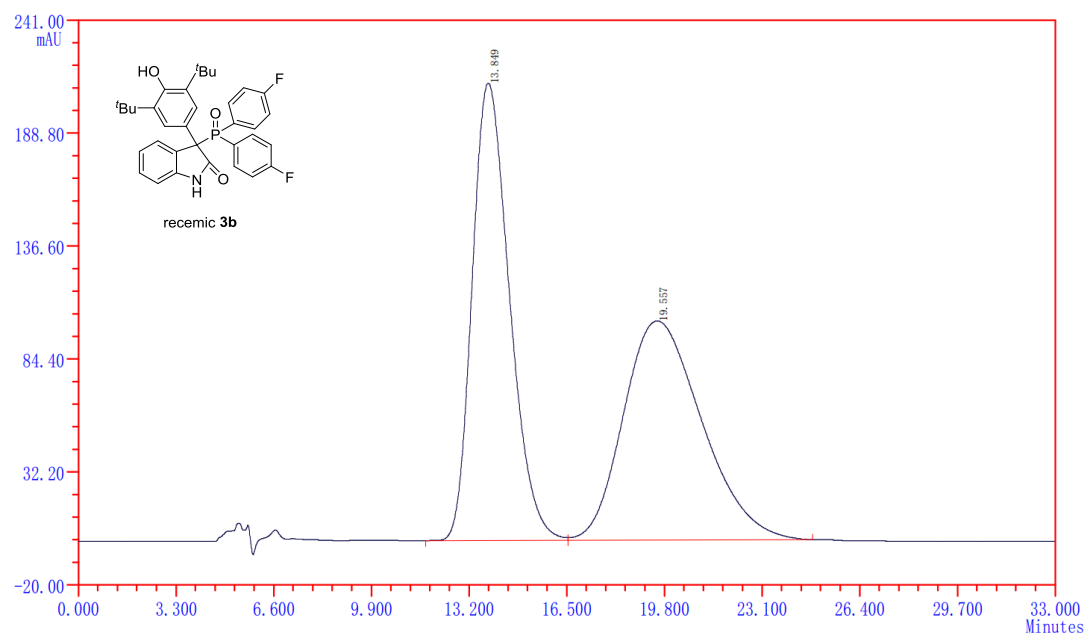

| Peak # | RetTime [Min] | Height [mAu] | Area [mAu*s] | Area %   |
|--------|---------------|--------------|--------------|----------|
| 1      | 13.849        | 211.37       | 18520.188    | 49.820   |
| 2      | 19.557        | 101.26       | 18654.282    | 50.180   |
| Total: |               | 312.63       | 37174.470    | 100.0000 |

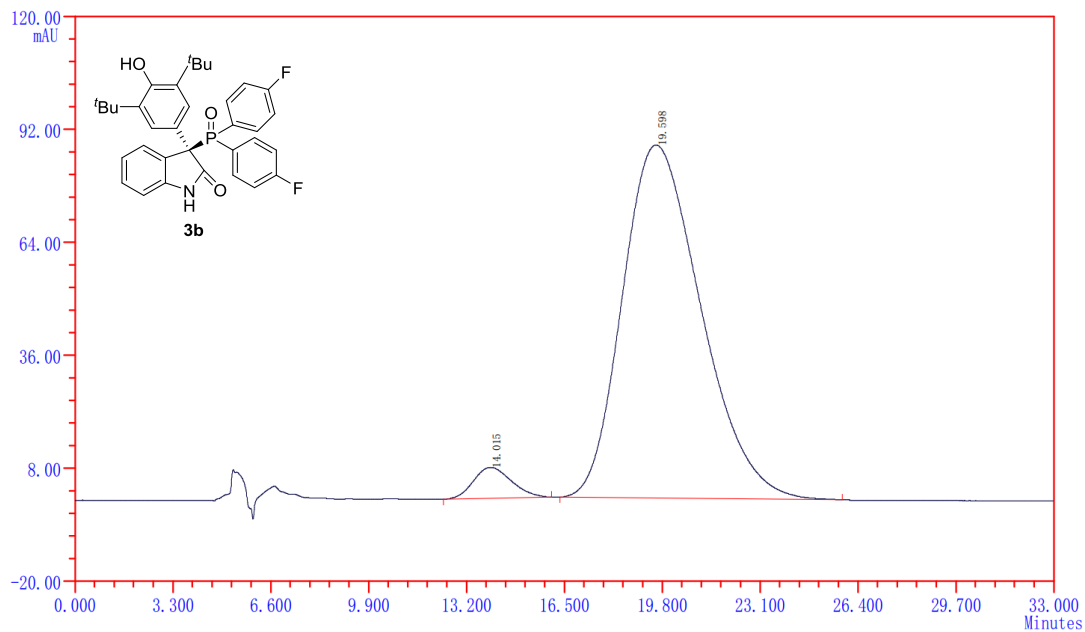

| Peak # | RetTime [Min] | Height [mAu] | Area [mAu*s] | Area %   |
|--------|---------------|--------------|--------------|----------|
| 1      | 14.015        | 7.69         | 686.009      | 4.083    |
| 2      | 19.598        | 87.49        | 16116.124    | 95.917   |
| Total: |               | 95.18        | 16802.133    | 100.0000 |

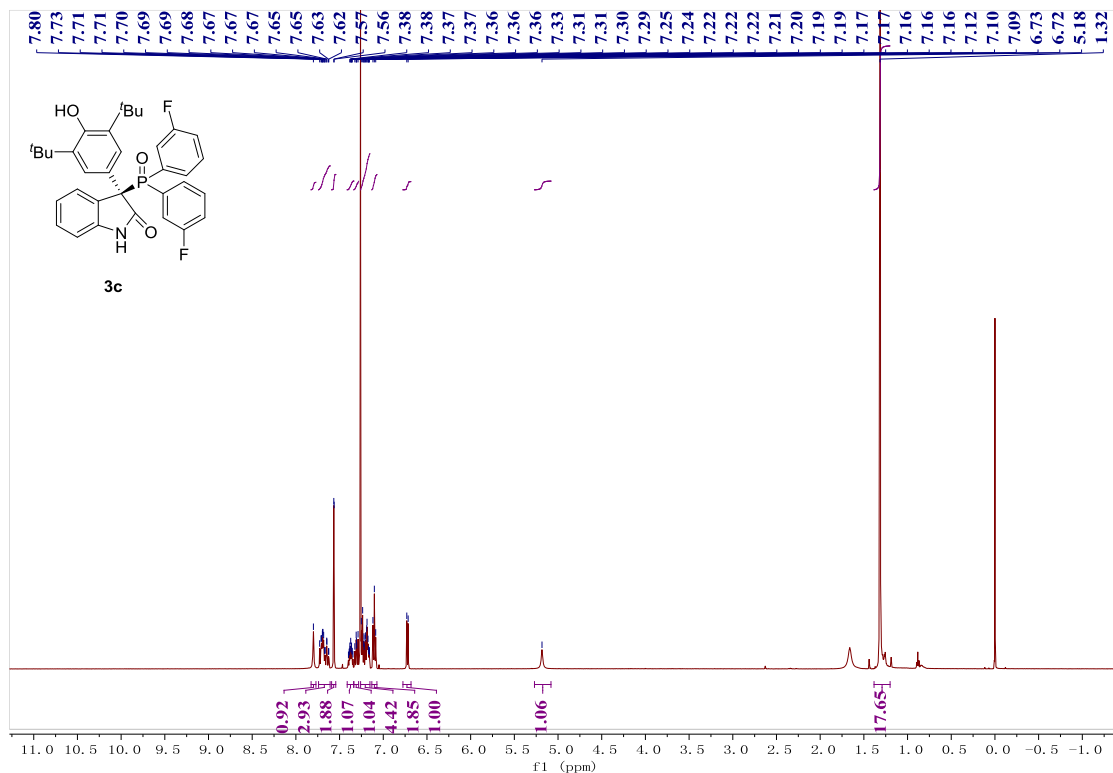

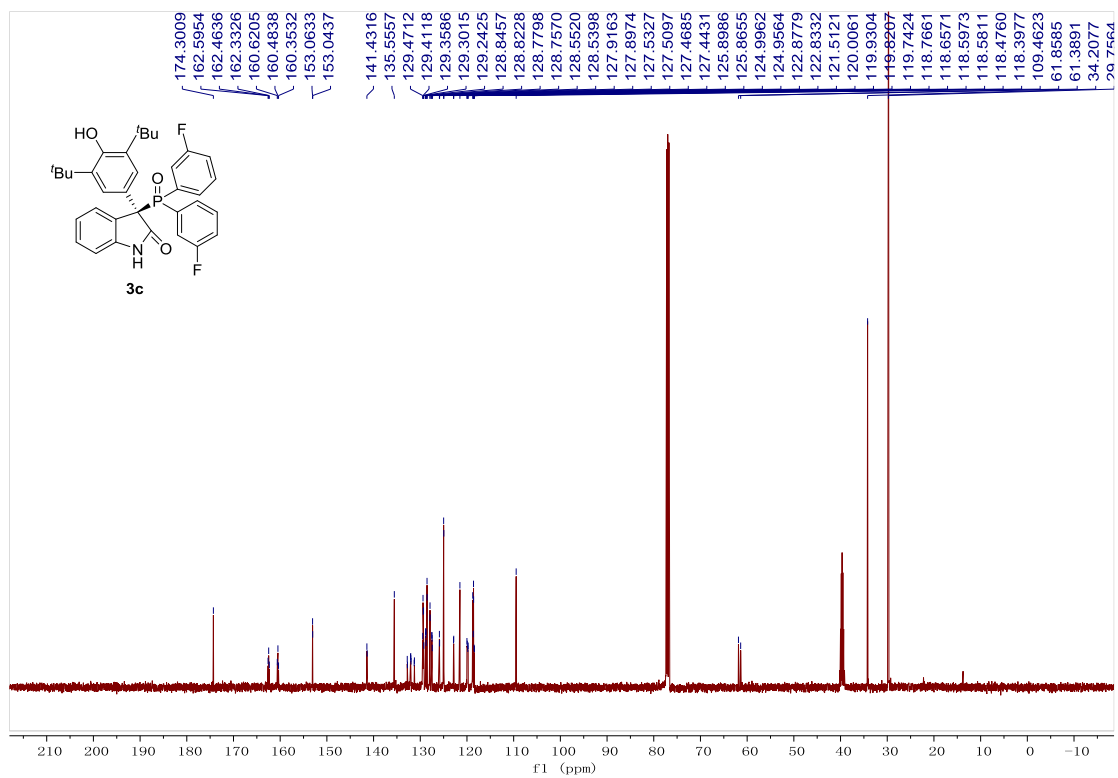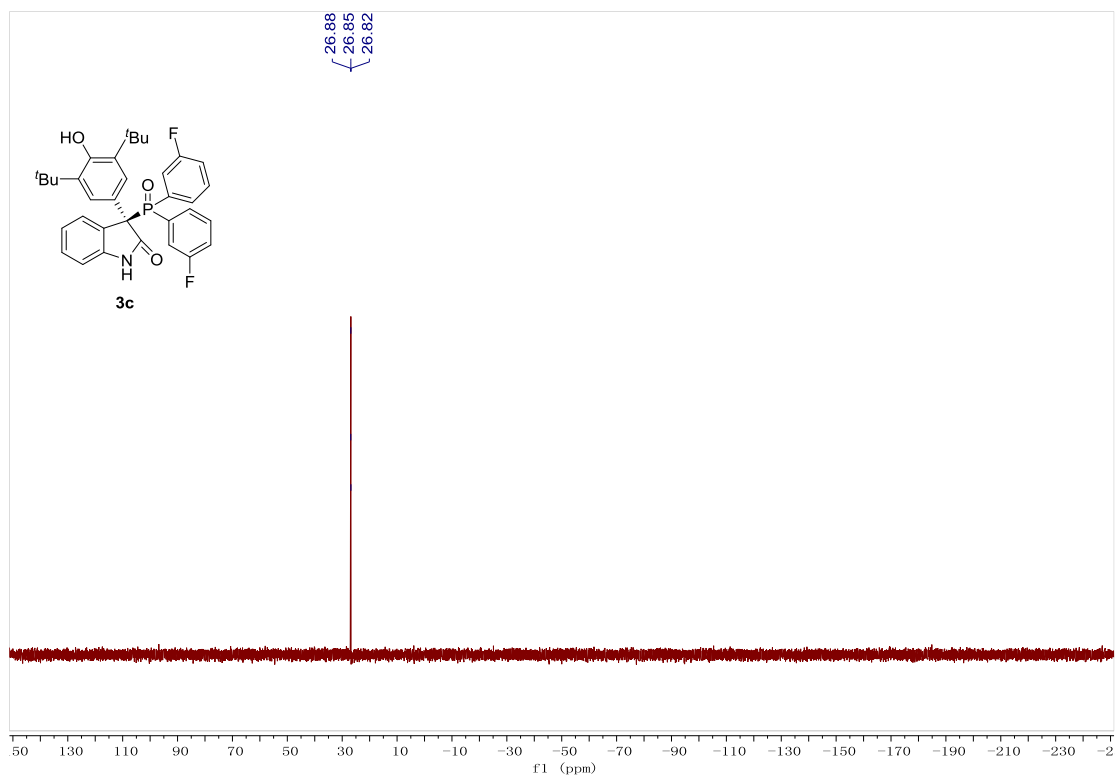

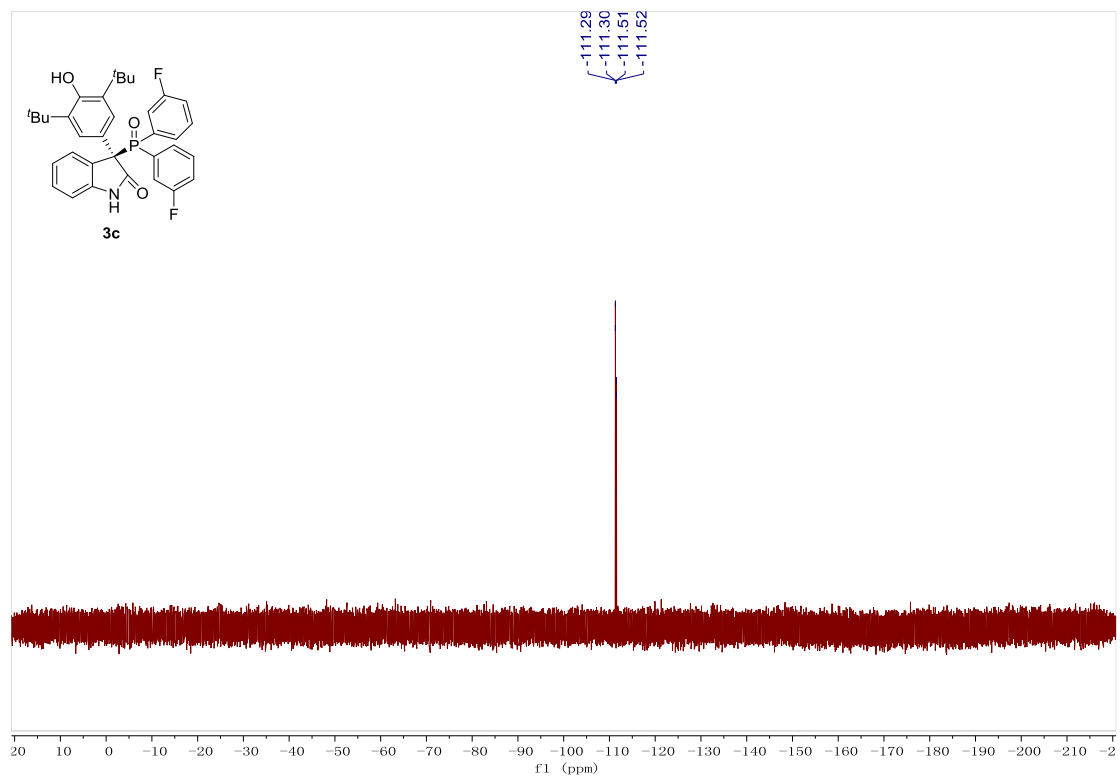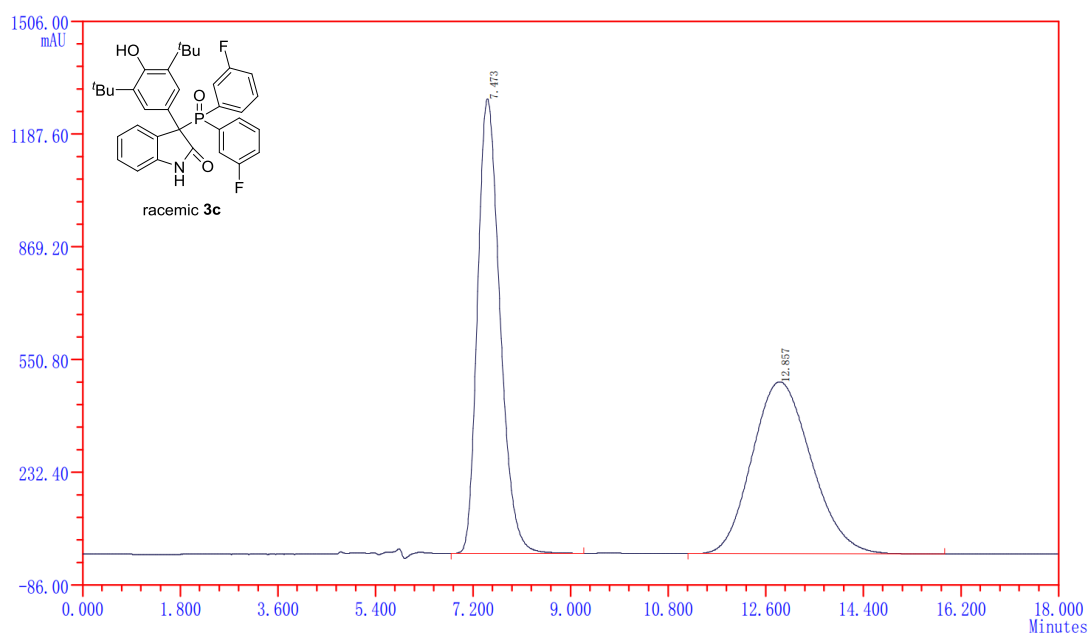

| Peak # | RetTime [Min] | Height [mAu] | Area [mAu*s] | Area %   |
|--------|---------------|--------------|--------------|----------|
| 1      | 7.473         | 1284.16      | 36974.111    | 50.000   |
| 2      | 12.857        | 485.83       | 36974.606    | 50.000   |
| Total: |               | 1769.99      | 73948.717    | 100.0000 |

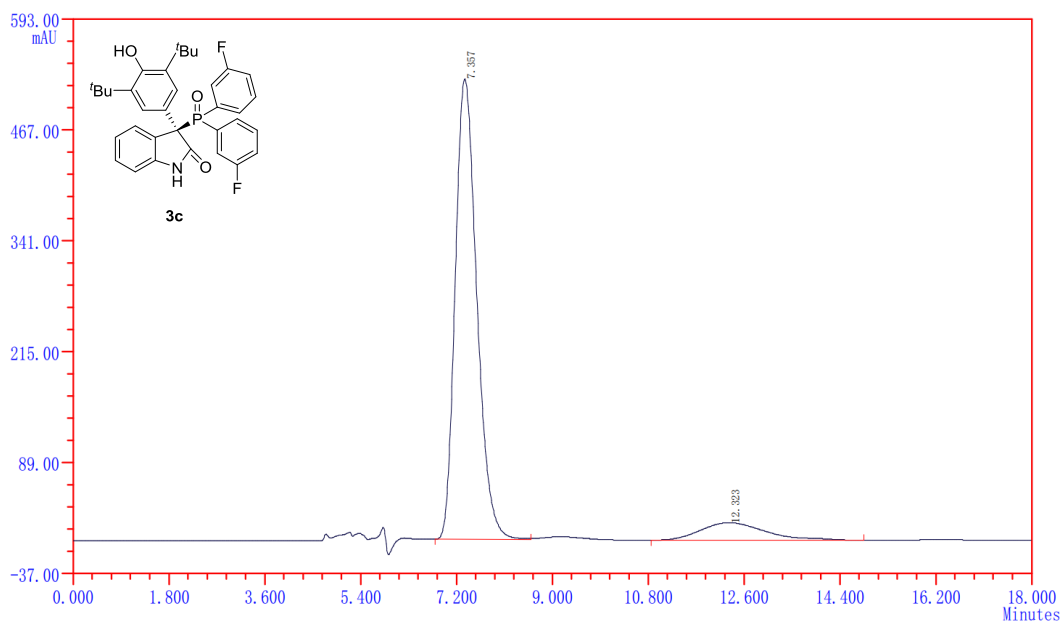

| Peak # | RetTime [Min] | Height [mAu] | Area [mAu*s] | Area %   |
|--------|---------------|--------------|--------------|----------|
| 1      | 7.357         | 523.02       | 14733.508    | 89.972   |
| 2      | 12.323        | 19.65        | 1642.172     | 10.028   |
| Total: |               | 542.67       | 16375.680    | 100.0000 |

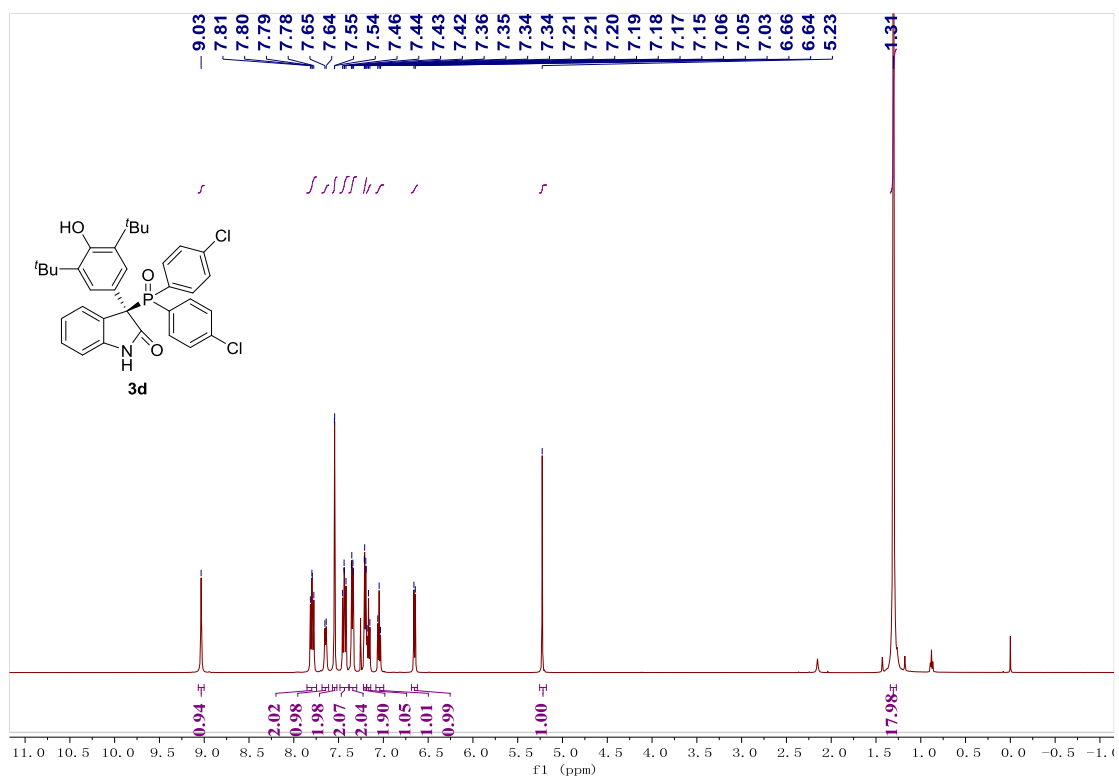

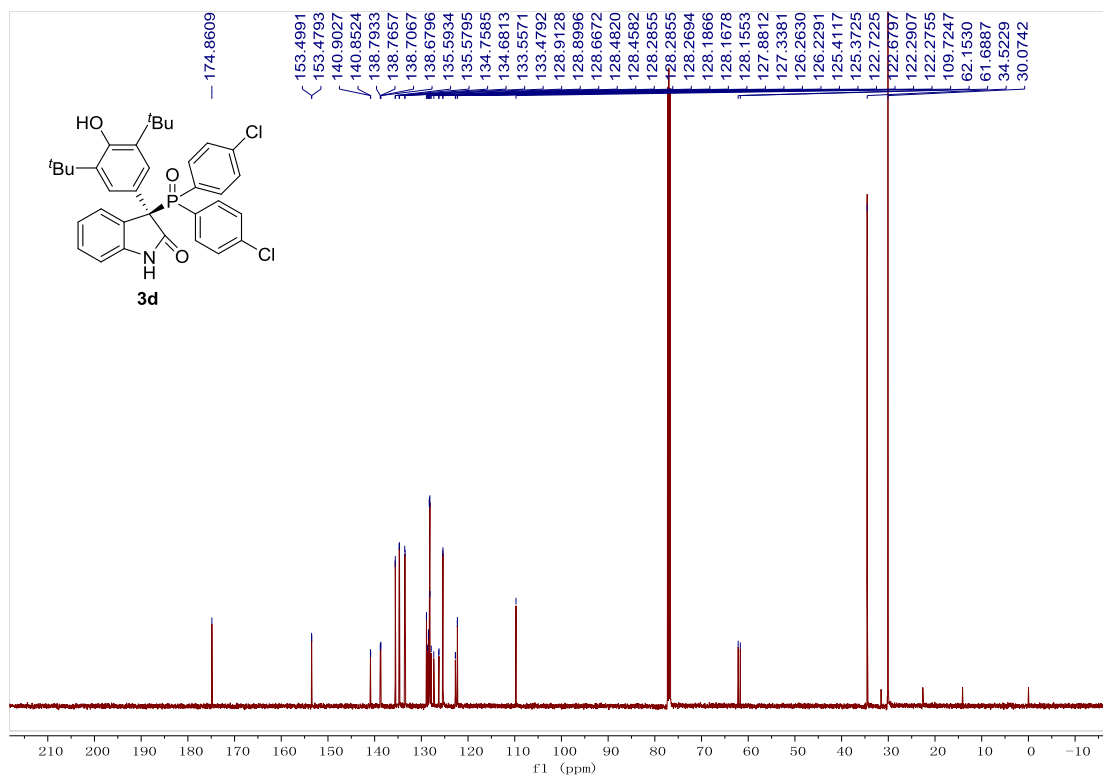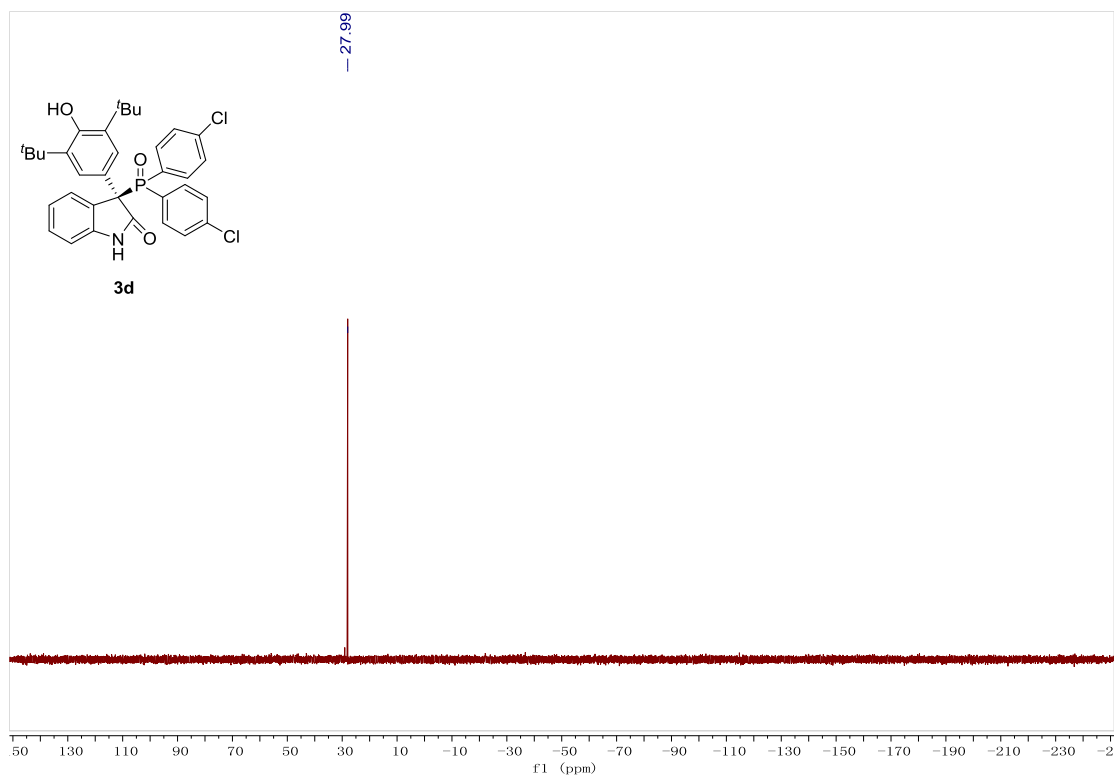

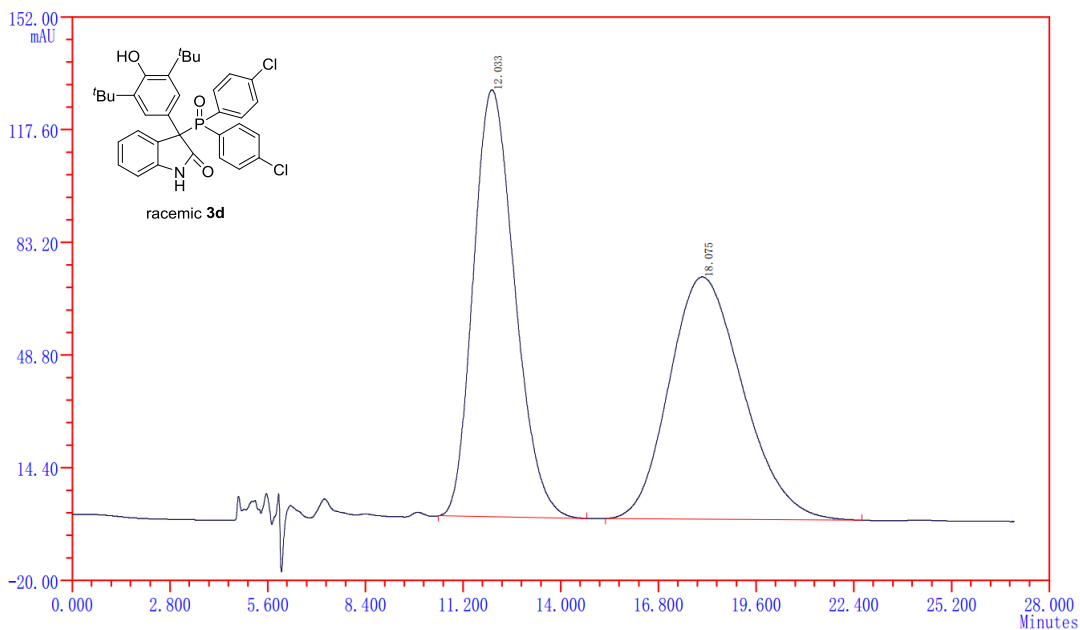

| Peak # | RetTime [Min] | Height [mAu] | Area [mAu*s] | Area %   |
|--------|---------------|--------------|--------------|----------|
| 1      | 12.033        | 130.29       | 10764.277    | 49.827   |
| 2      | 18.075        | 73.93        | 10838.968    | 50.173   |
| Total: |               | 204.22       | 21603.245    | 100.0000 |

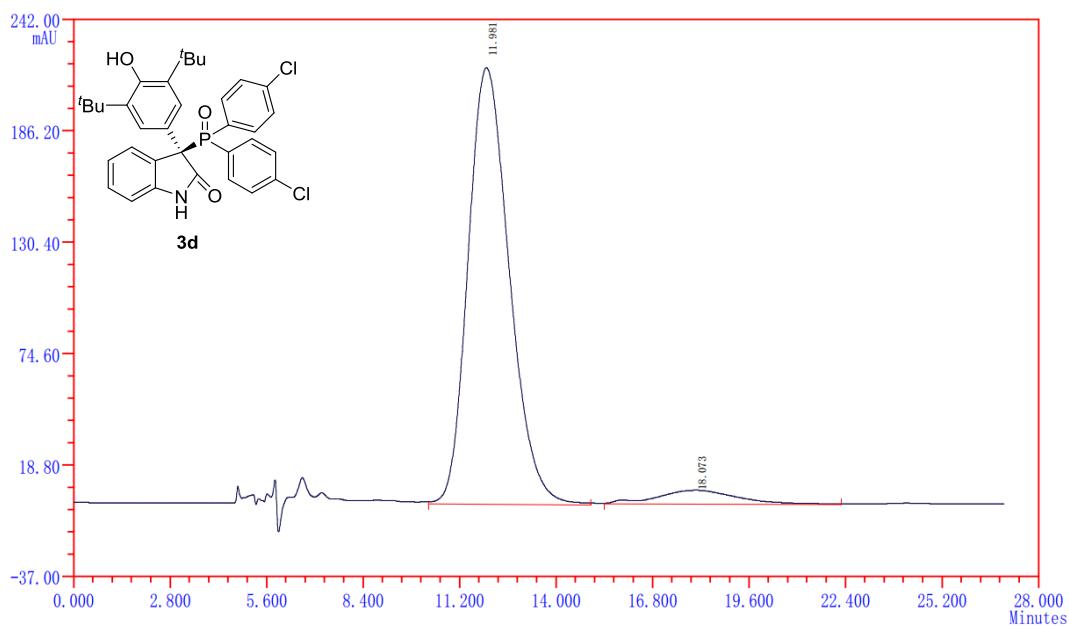

| Peak # | RetTime [Min] | Height [mAu] | Area [mAu*s] | Area %   |
|--------|---------------|--------------|--------------|----------|
| 1      | 11.981        | 218.75       | 18217.192    | 94.135   |
| 2      | 18.073        | 6.92         | 1134.927     | 5.865    |
| Total: |               | 225.67       | 19352.118    | 100.0000 |



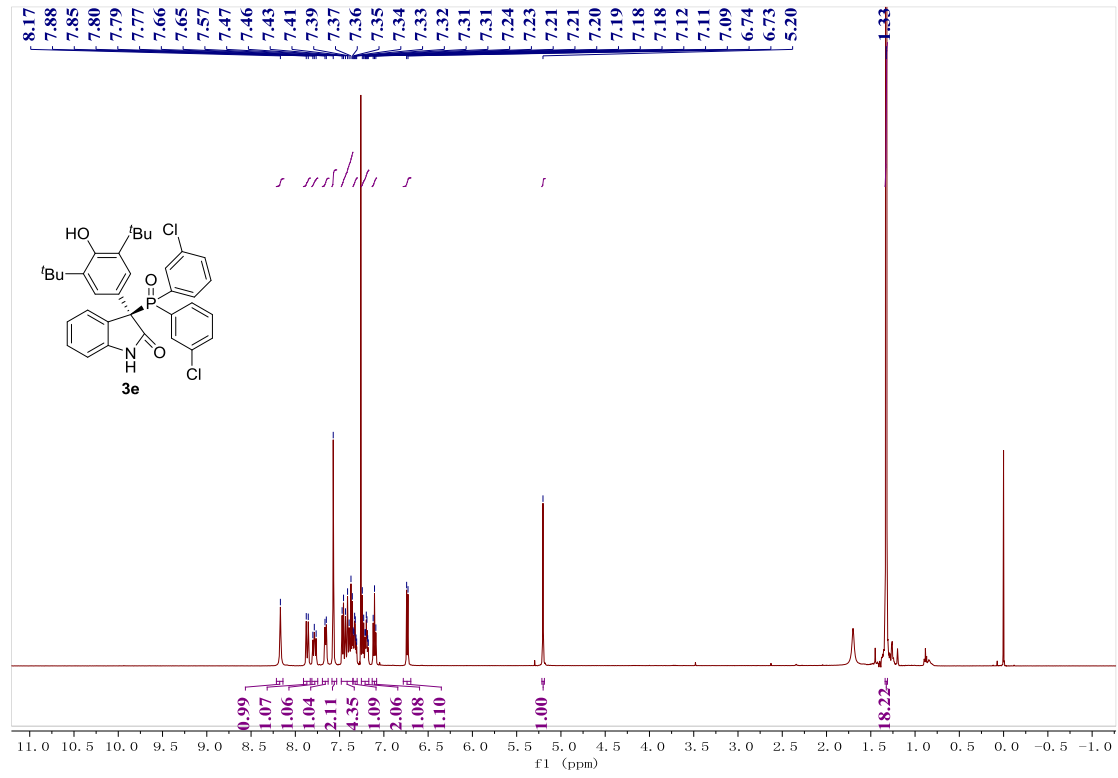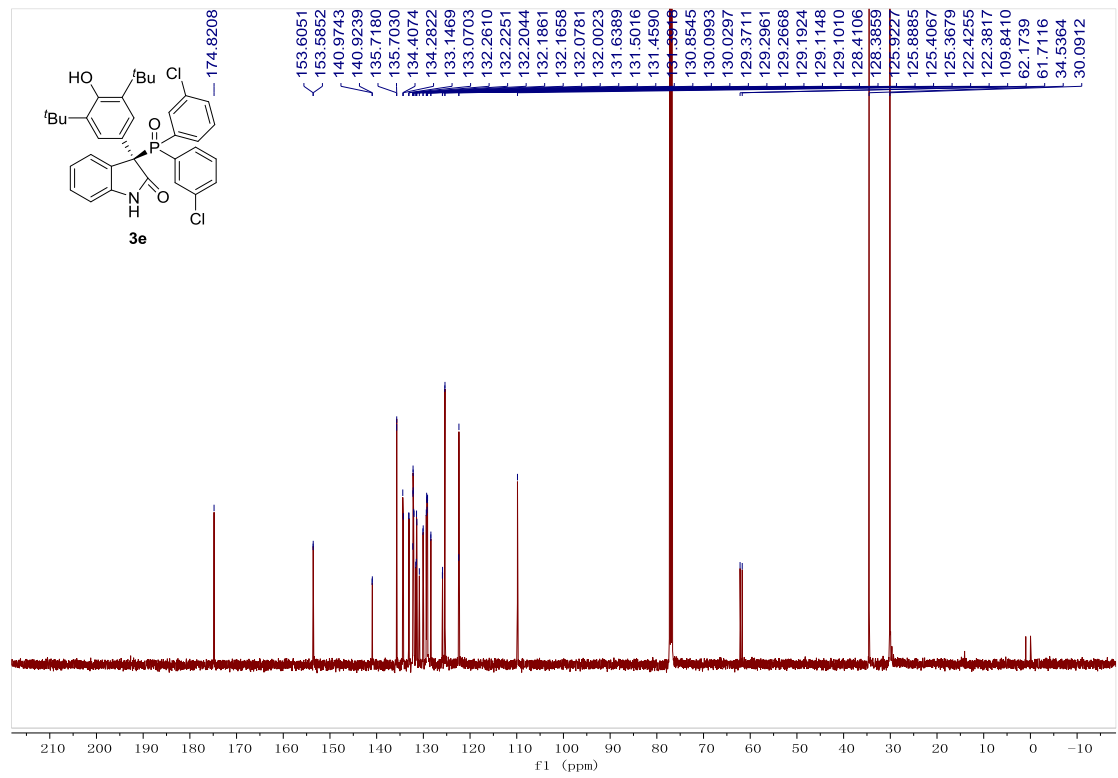

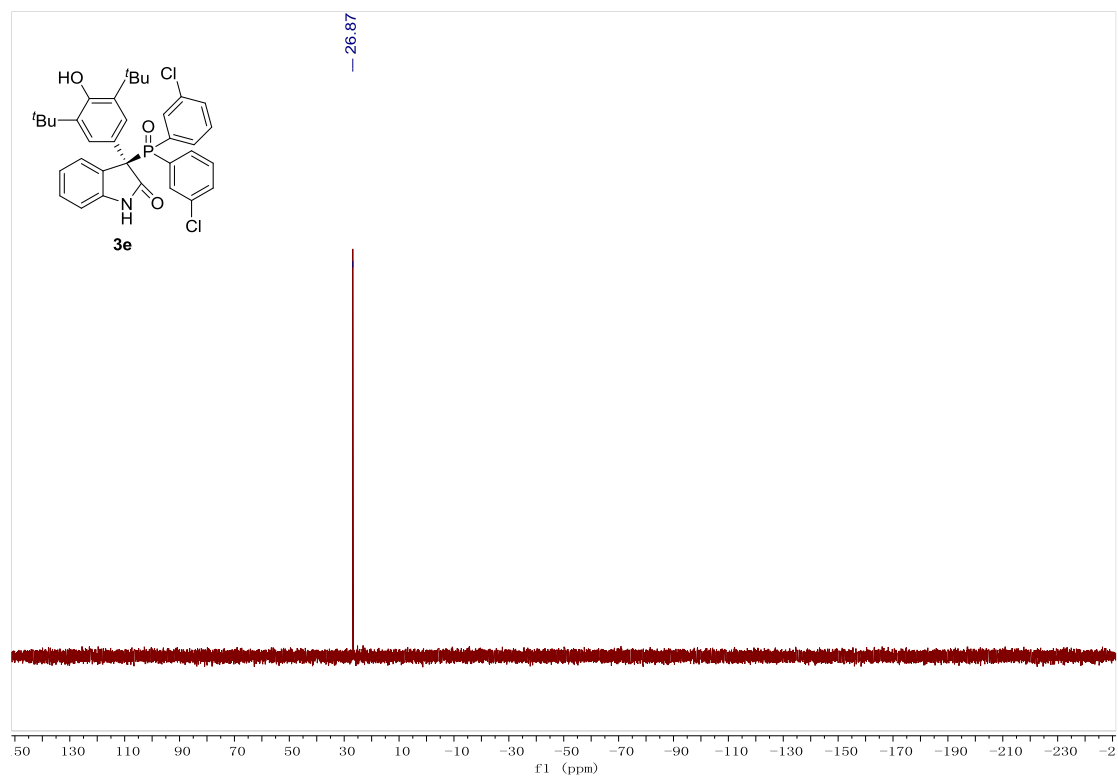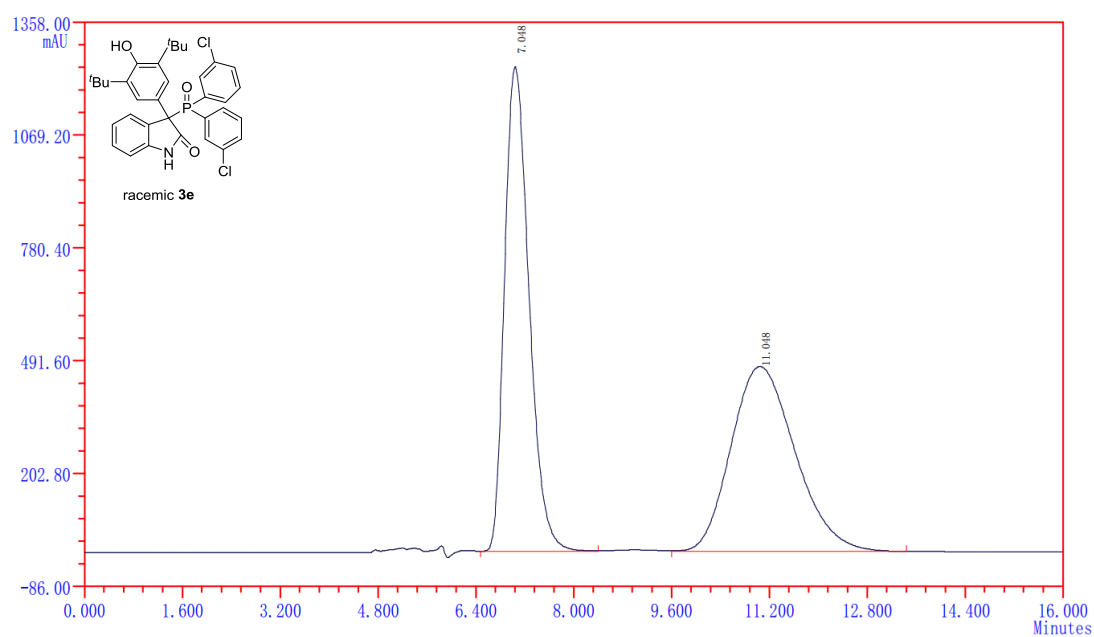

| Peak # | RetTime [Min] | Height [mAu] | Area [mAu*s] | Area %   |
|--------|---------------|--------------|--------------|----------|
| 1      | 7.048         | 1239.77      | 34393.488    | 49.906   |
| 2      | 11.048        | 473.23       | 34523.367    | 50.094   |
| Total: |               | 1713.00      | 68916.854    | 100.0000 |

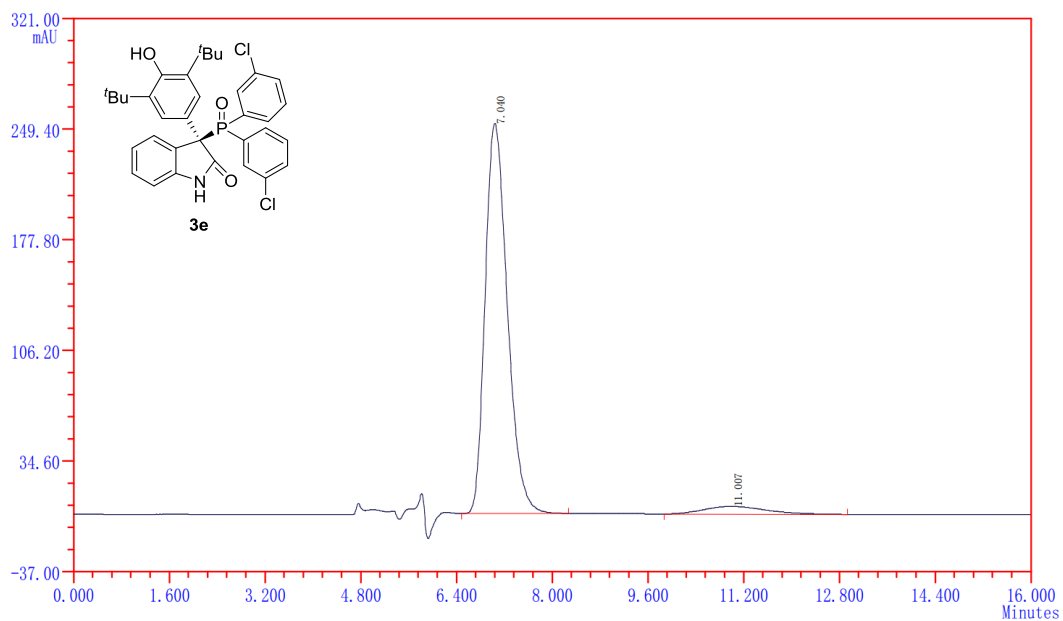

| Peak # | RetTime [Min] | Height [mAu] | Area [mAu*s] | Area %   |
|--------|---------------|--------------|--------------|----------|
| 1      | 7.040         | 252.53       | 6531.458     | 94.749   |
| 2      | 11.007        | 5.01         | 361.975      | 5.251    |
| Total: |               | 257.54       | 6893.433     | 100.0000 |

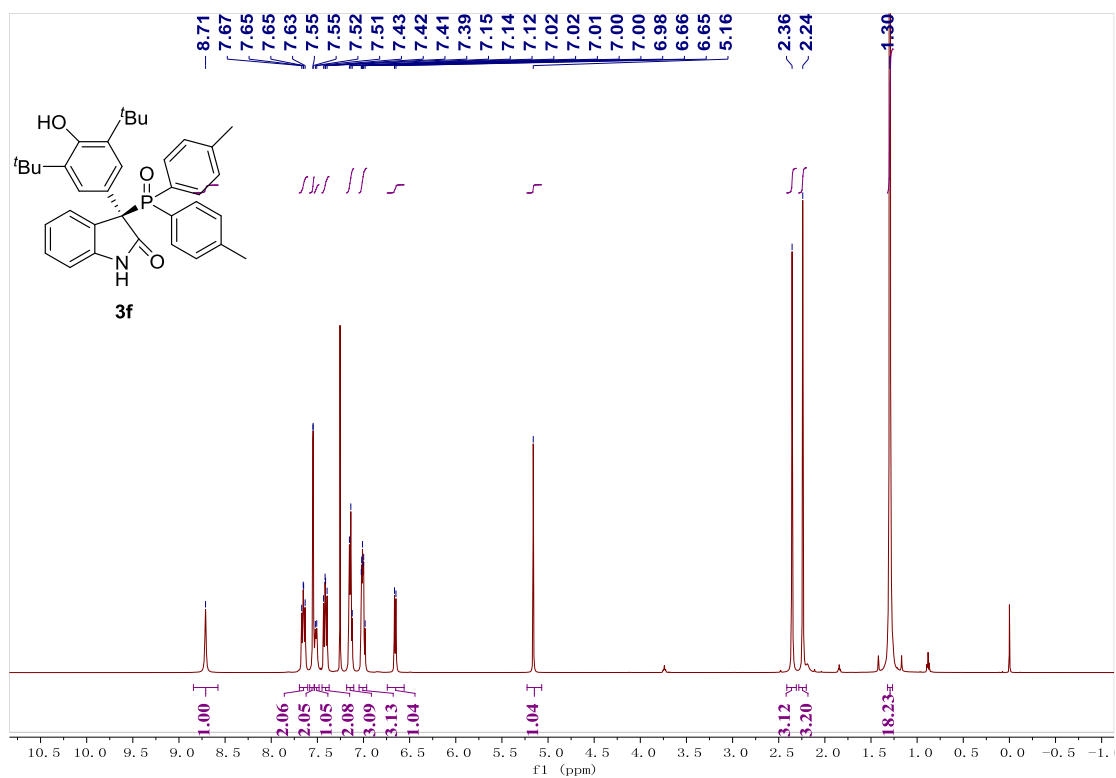

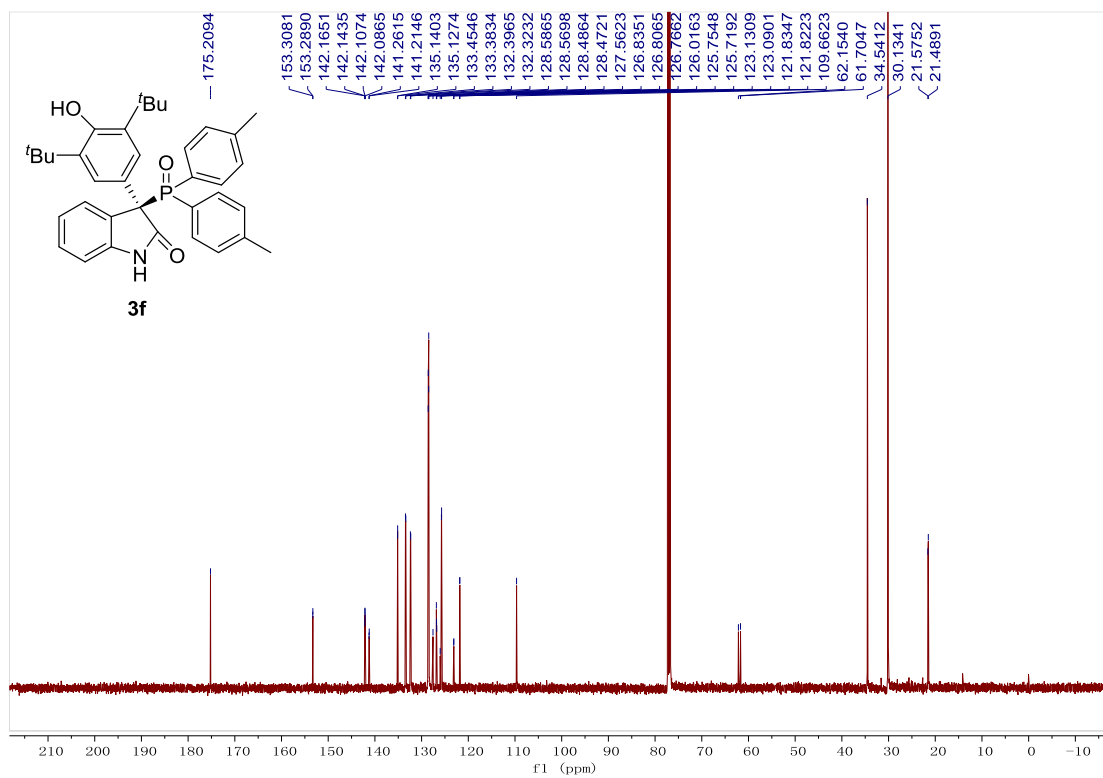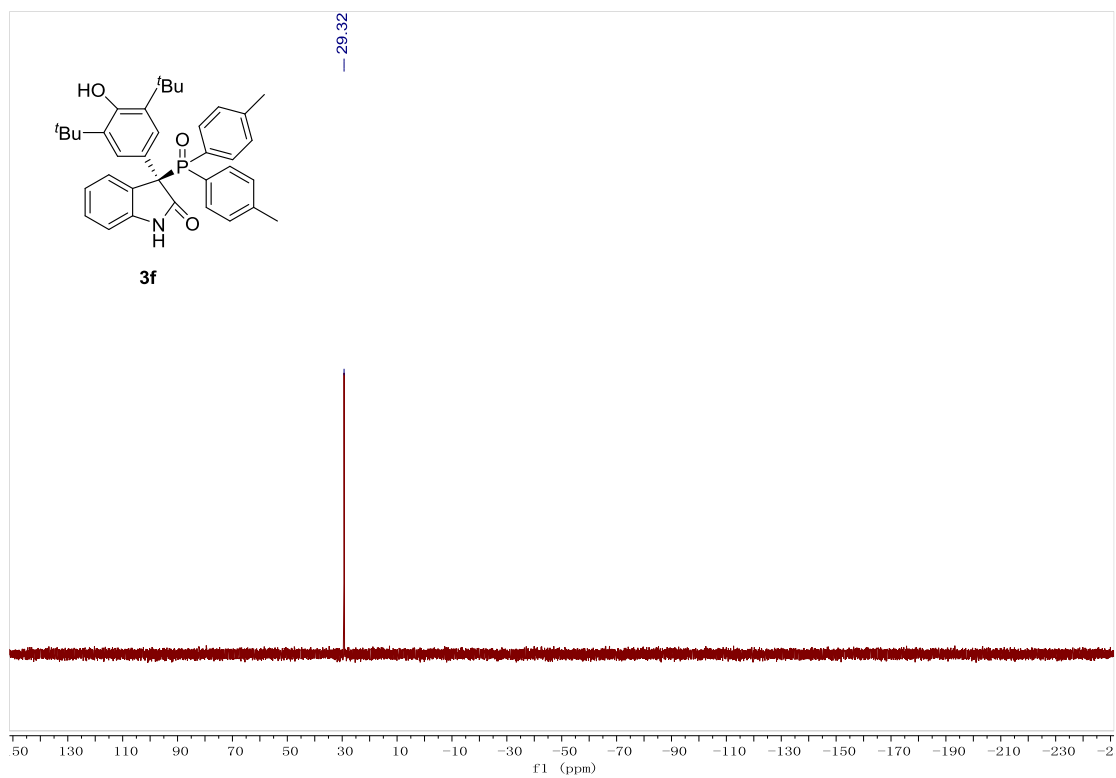

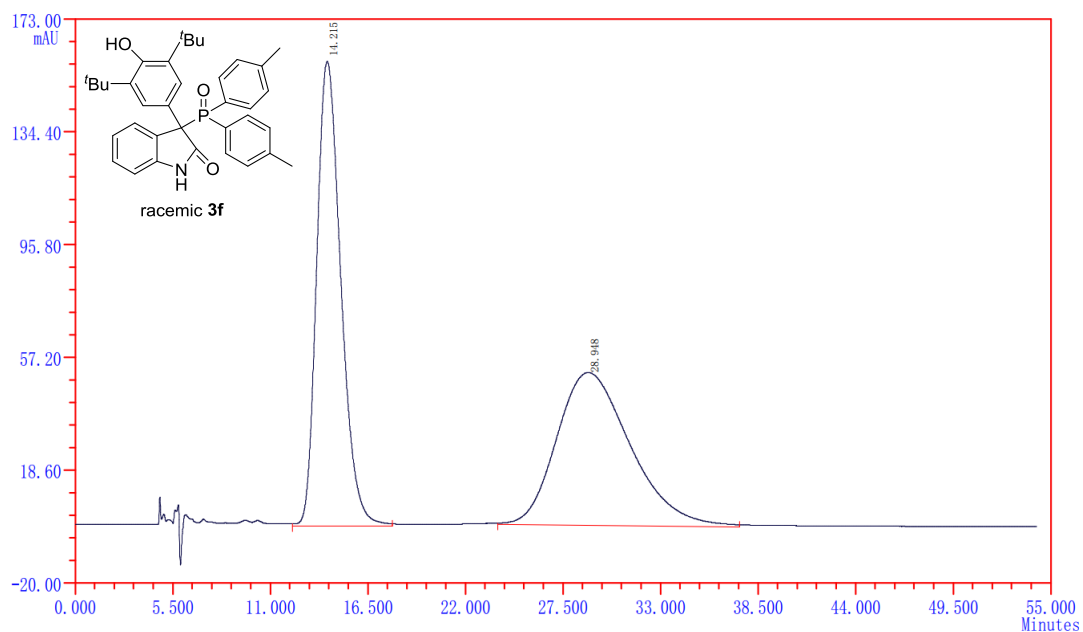

| Peak # | RetTime [Min] | Height [mAu] | Area [mAu*s] | Area %   |
|--------|---------------|--------------|--------------|----------|
| 1      | 14.215        | 158.93       | 15066.674    | 49.855   |
| 2      | 28.948        | 52.30        | 15154.042    | 50.145   |
| Total: |               | 211.23       | 30220.716    | 100.0000 |

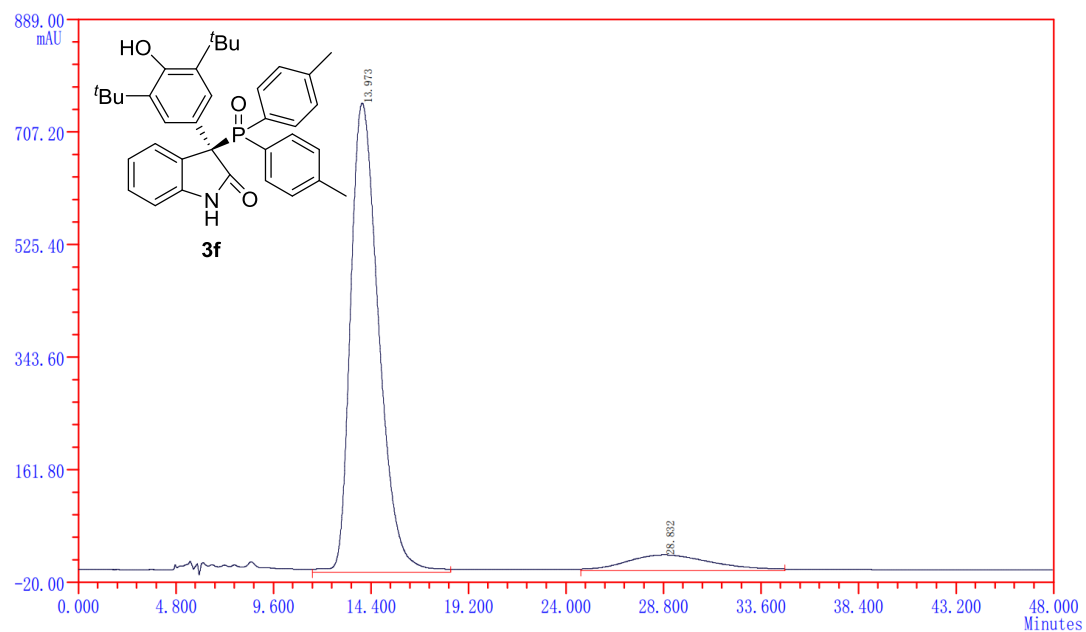

| Peak # | RetTime [Min] | Height [mAu] | Area [mAu*s] | Area %   |
|--------|---------------|--------------|--------------|----------|
| 1      | 13.973        | 757.34       | 72987.553    | 90.790   |
| 2      | 28.832        | 25.07        | 7404.335     | 9.210    |
| Total: |               | 782.41       | 80391.889    | 100.0000 |

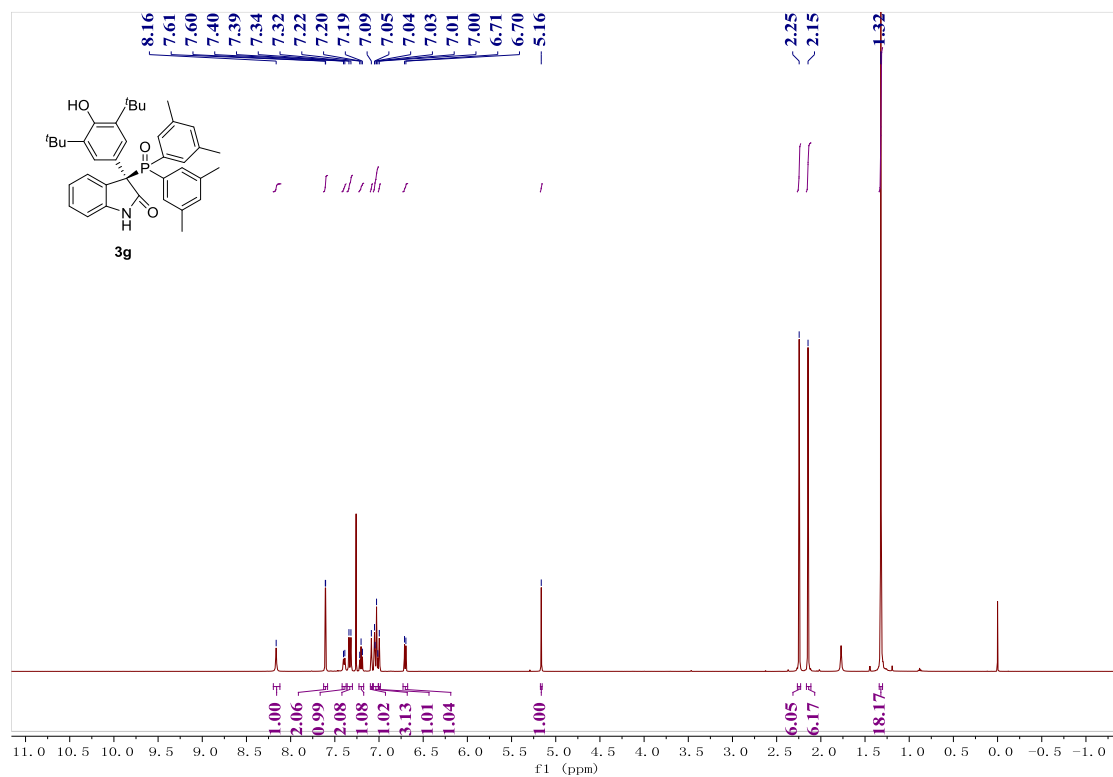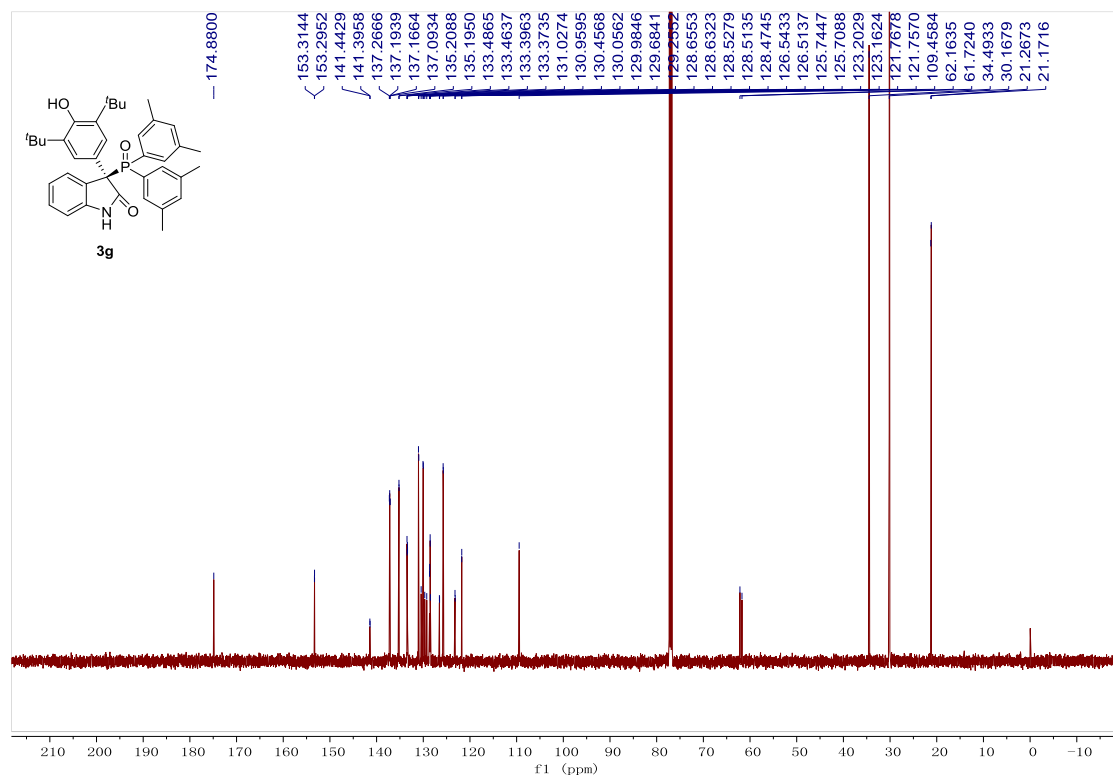

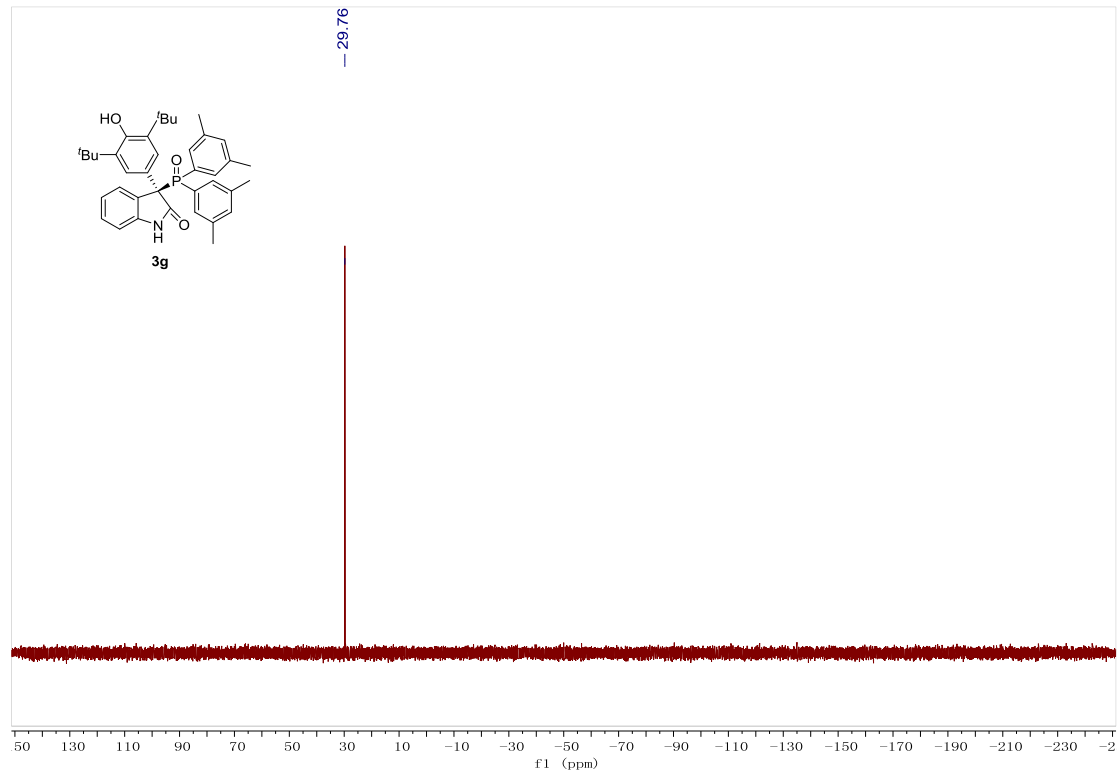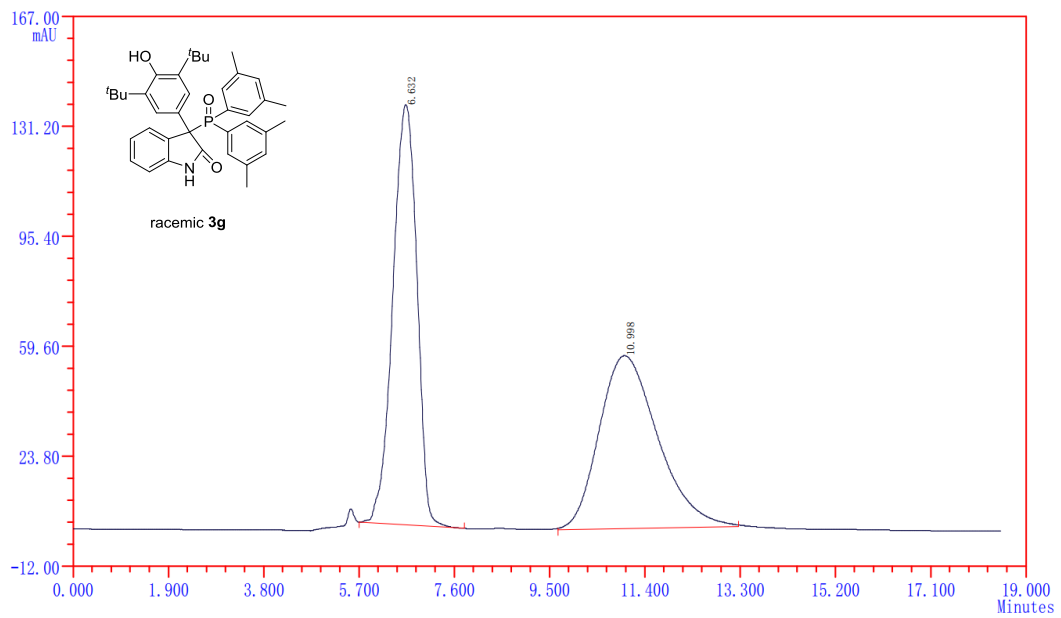

| Peak # | RetTime [Min] | Height [mAu] | Area [mAu*s] | Area %   |
|--------|---------------|--------------|--------------|----------|
| 1      | 6.632         | 136.88       | 4570.464     | 49.860   |
| 2      | 10.998        | 56.29        | 4596.040     | 50.140   |
| Total: |               | 193.17       | 9166.504     | 100.0000 |

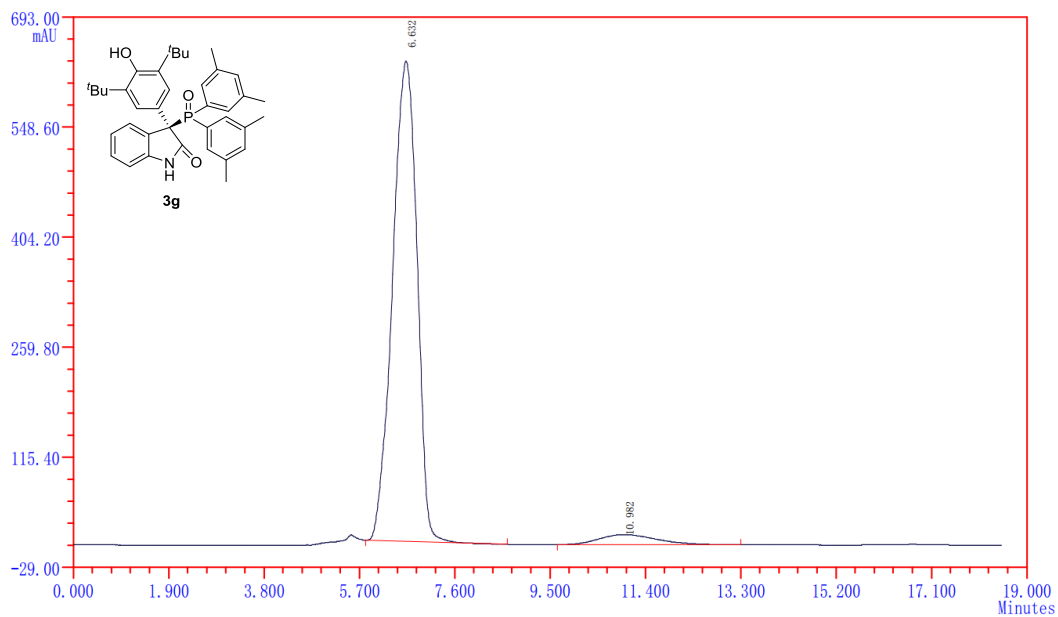

| Peak # | RetTime [Min] | Height [mAu] | Area [mAu*s] | Area %   |
|--------|---------------|--------------|--------------|----------|
| 1      | 6.632         | 630.69       | 21392.947    | 95.210   |
| 2      | 10.982        | 13.38        | 1076.290     | 4.790    |
| Total: |               | 644.07       | 22469.238    | 100.0000 |

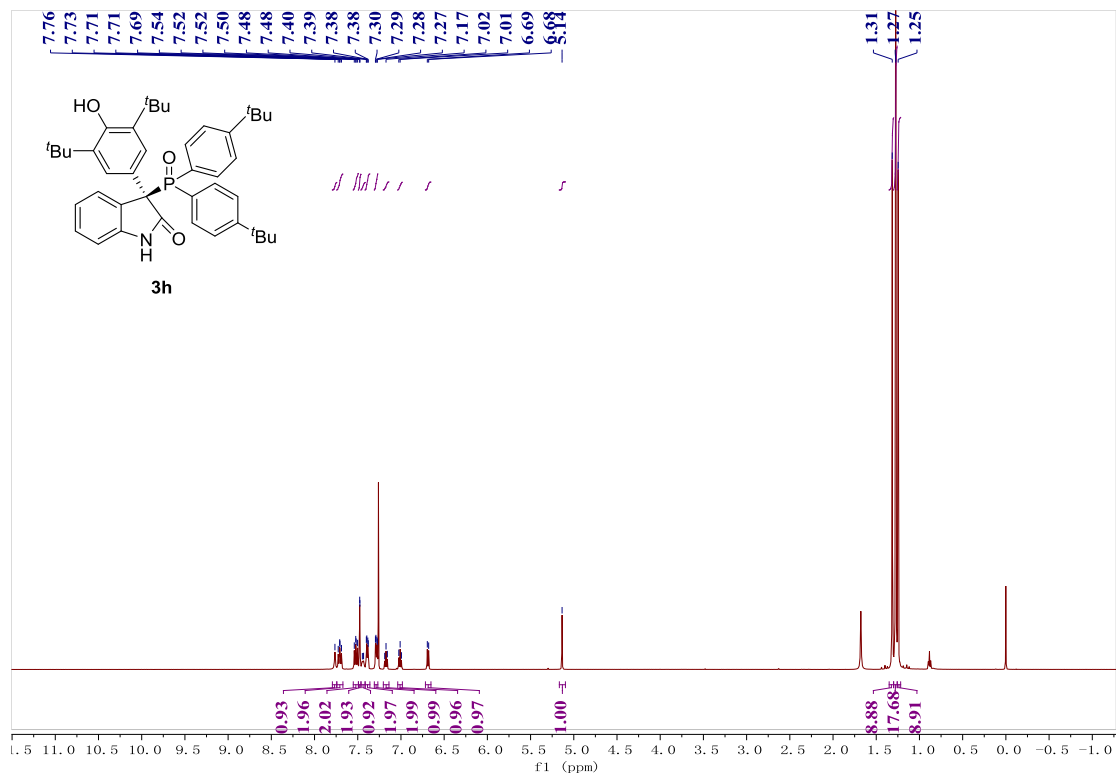



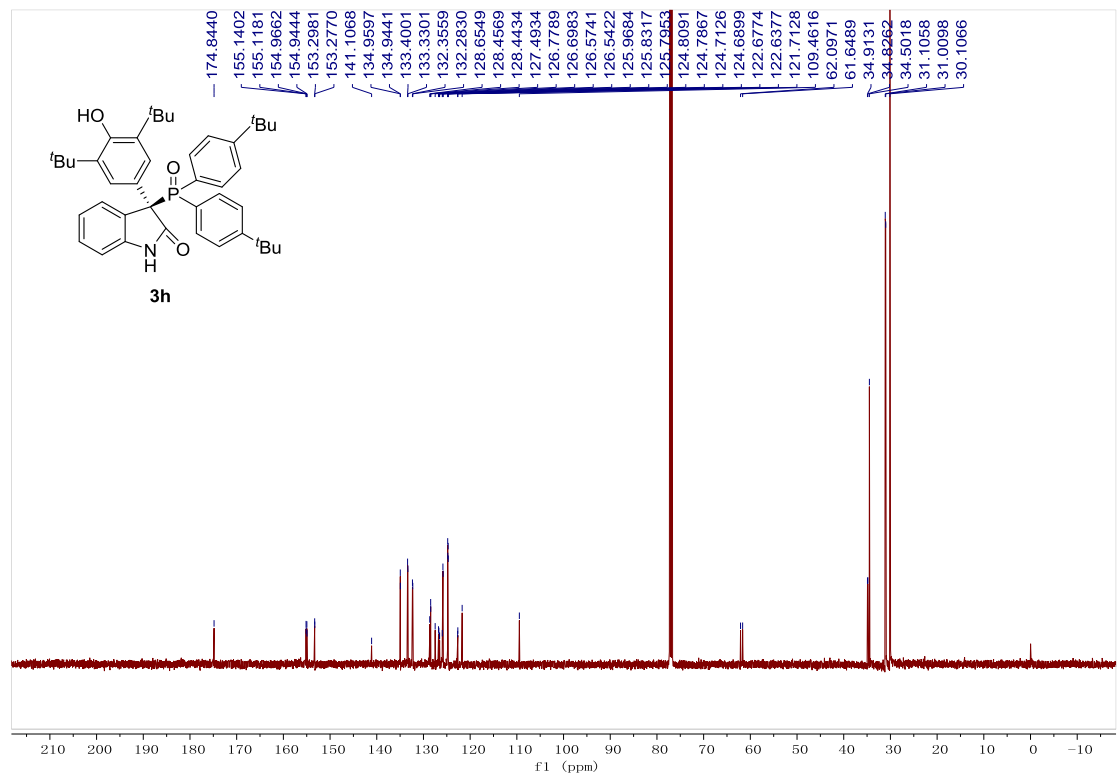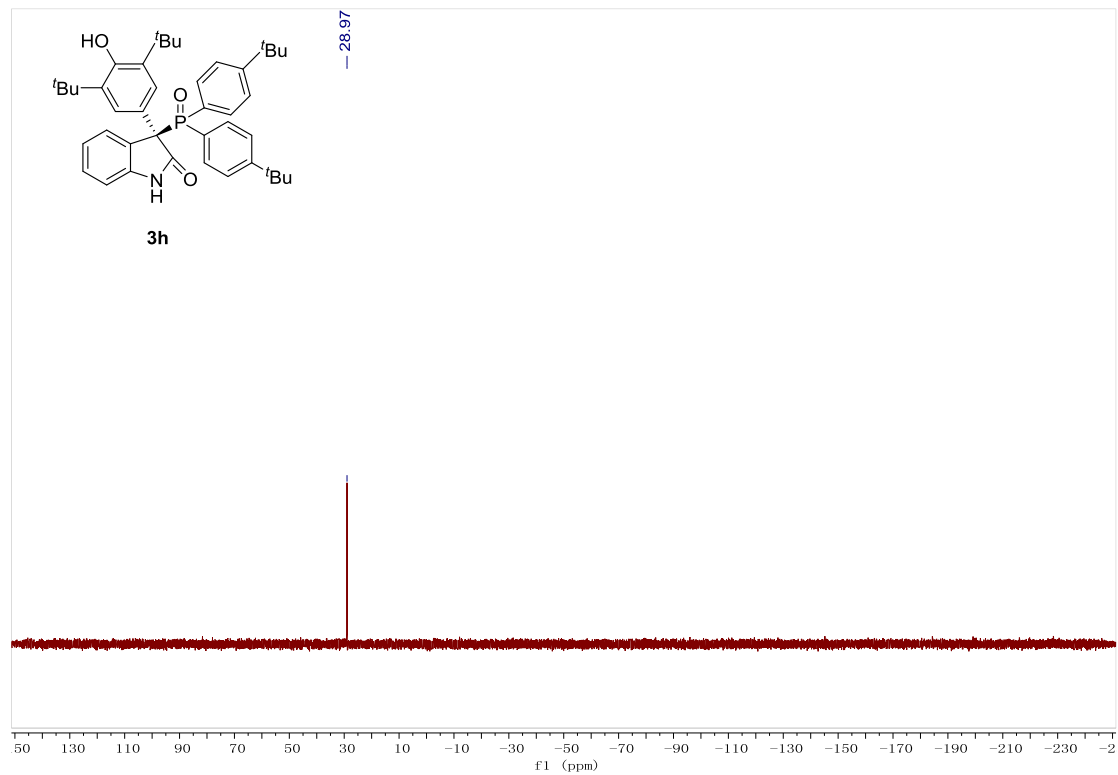

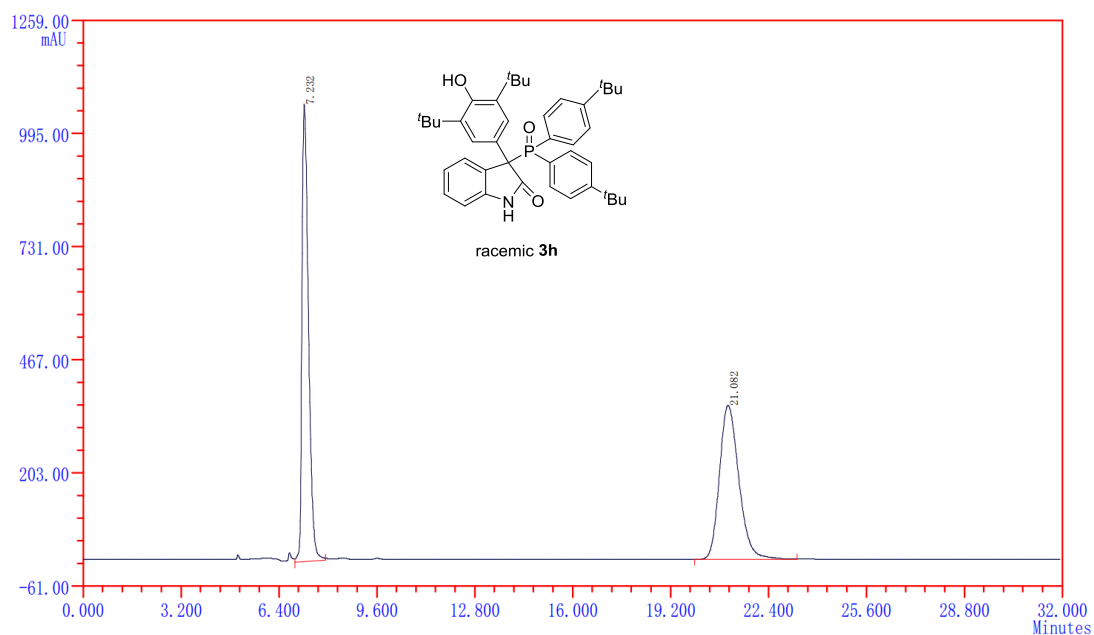

| Peak # | RetTime [Min] | Height [mAu] | Area [mAu*s] | Area %   |
|--------|---------------|--------------|--------------|----------|
| 1      | 7.232         | 1068.08      | 15778.837    | 49.853   |
| 2      | 21.082        | 359.22       | 15871.861    | 50.147   |
| Total: |               | 1427.30      | 31650.697    | 100.0000 |

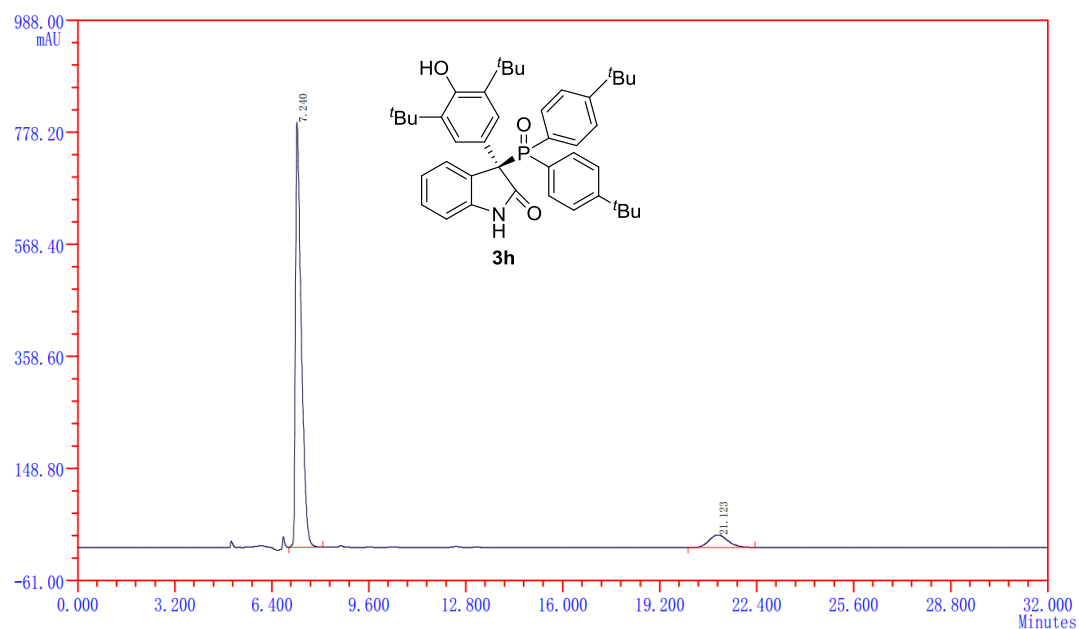

| Peak # | RetTime [Min] | Height [mAu] | Area [mAu*s] | Area %   |
|--------|---------------|--------------|--------------|----------|
| 1      | 7.240         | 795.70       | 10523.326    | 91.186   |
| 2      | 21.123        | 23.63        | 1017.137     | 8.814    |
| Total: |               | 819.33       | 11540.463    | 100.0000 |

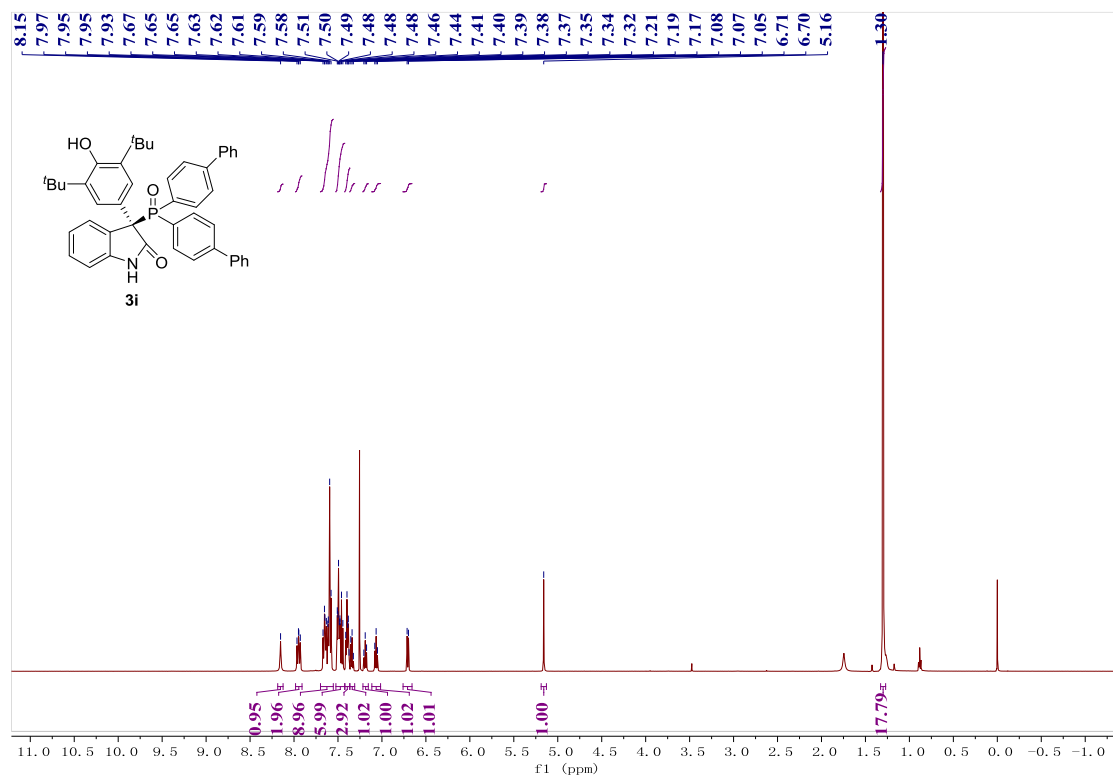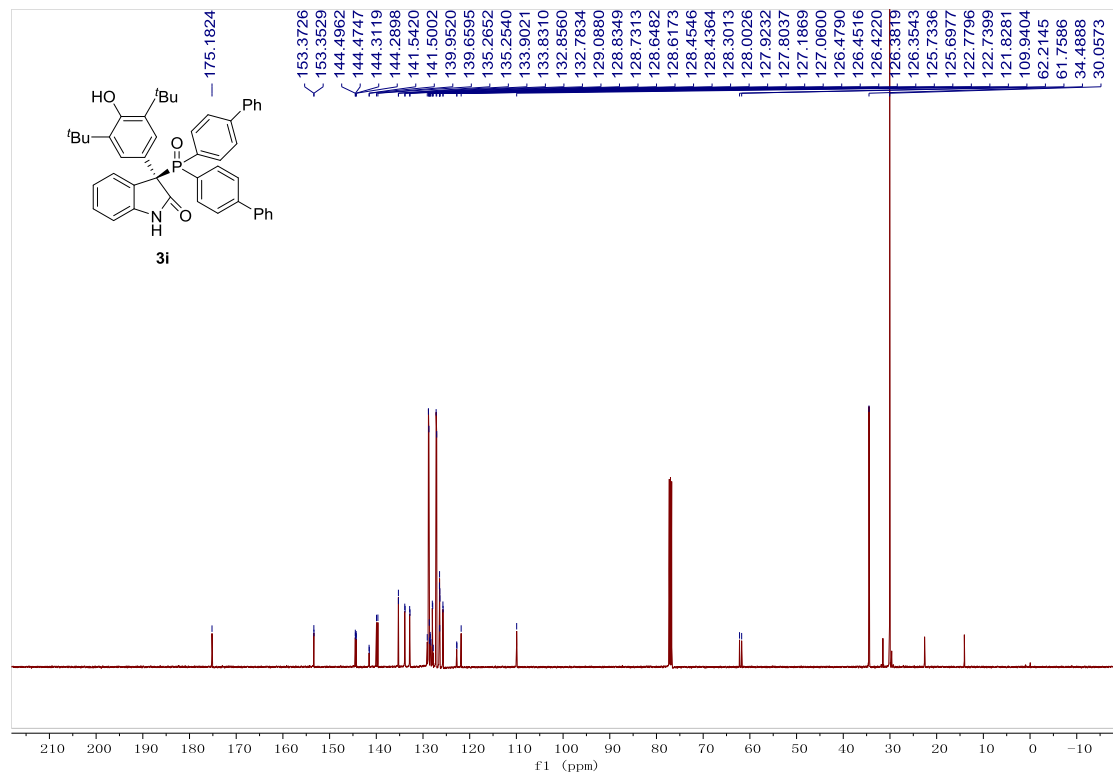

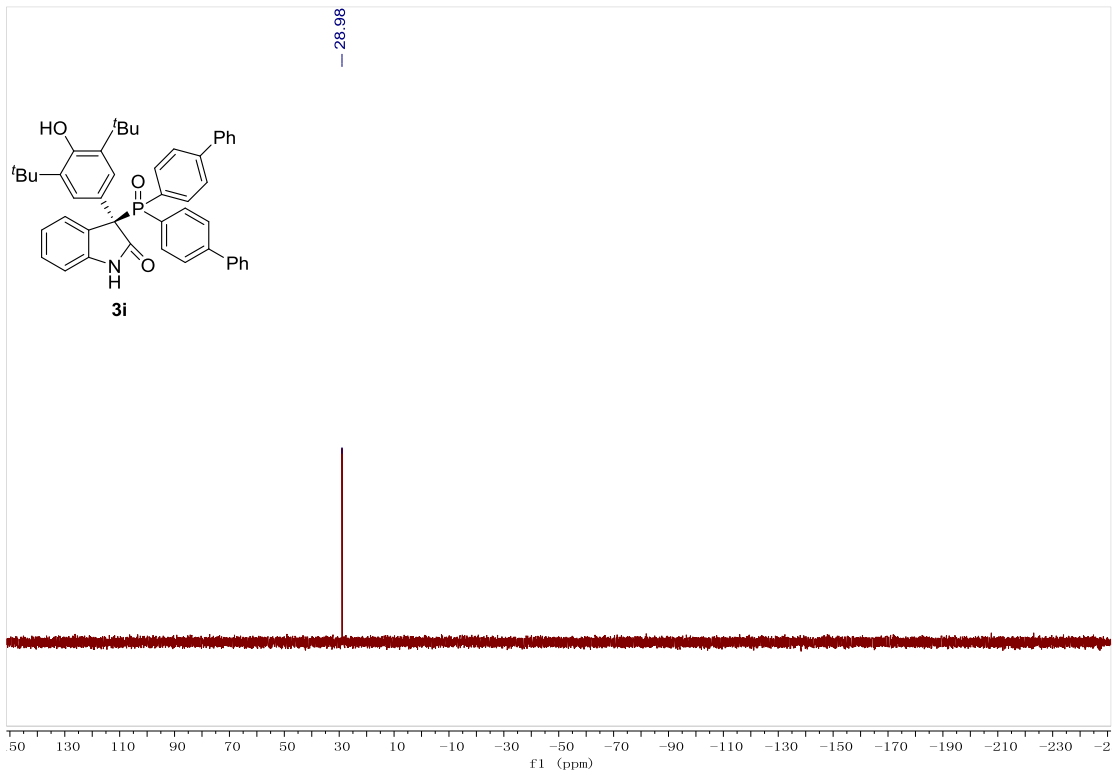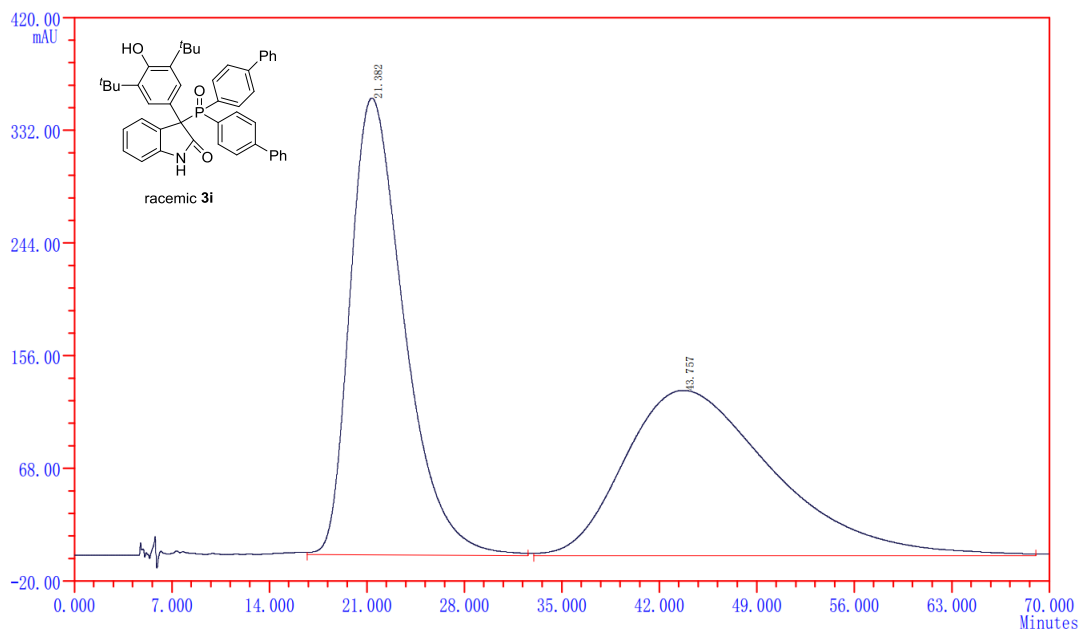

| Peak # | RetTime [Min] | Height [mAu] | Area [mAu*s] | Area %   |
|--------|---------------|--------------|--------------|----------|
| 1      | 21.382        | 356.81       | 96274.194    | 49.924   |
| 2      | 43.757        | 129.22       | 96569.196    | 50.076   |
| Total: |               | 387.78       | 192843.390   | 100.0000 |

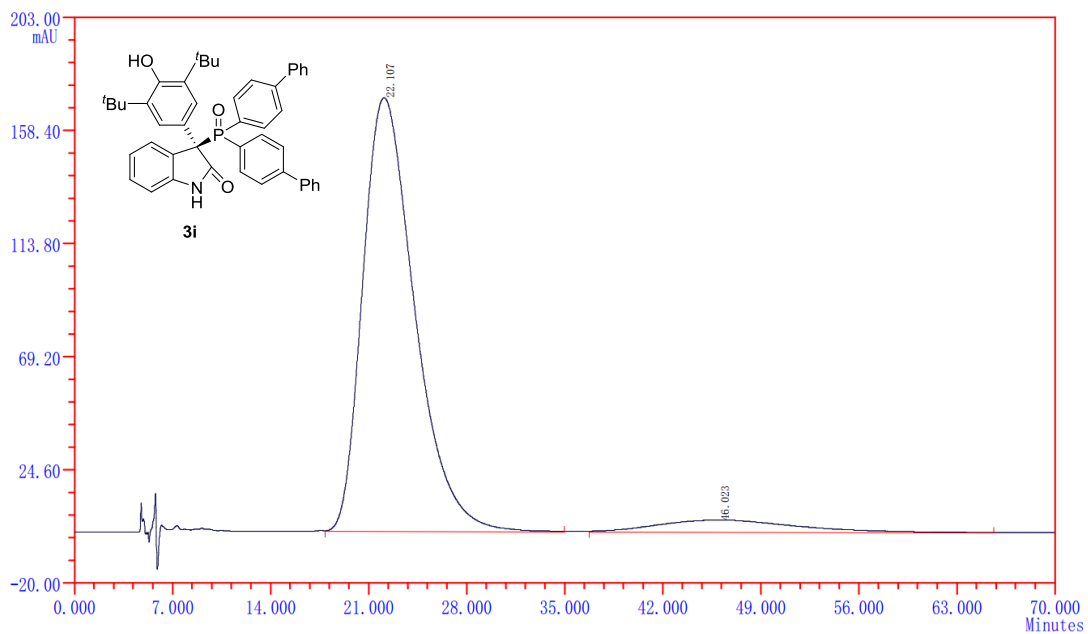

| Peak # | RetTime [Min] | Height [mAu] | Area [mAu*s] | Area %   |
|--------|---------------|--------------|--------------|----------|
| 1      | 22.107        | 171.00       | 44075.641    | 92.714   |
| 2      | 46.023        | 4.86         | 3463.770     | 7.286    |
| Total: |               | 175.86       | 47539.411    | 100.0000 |

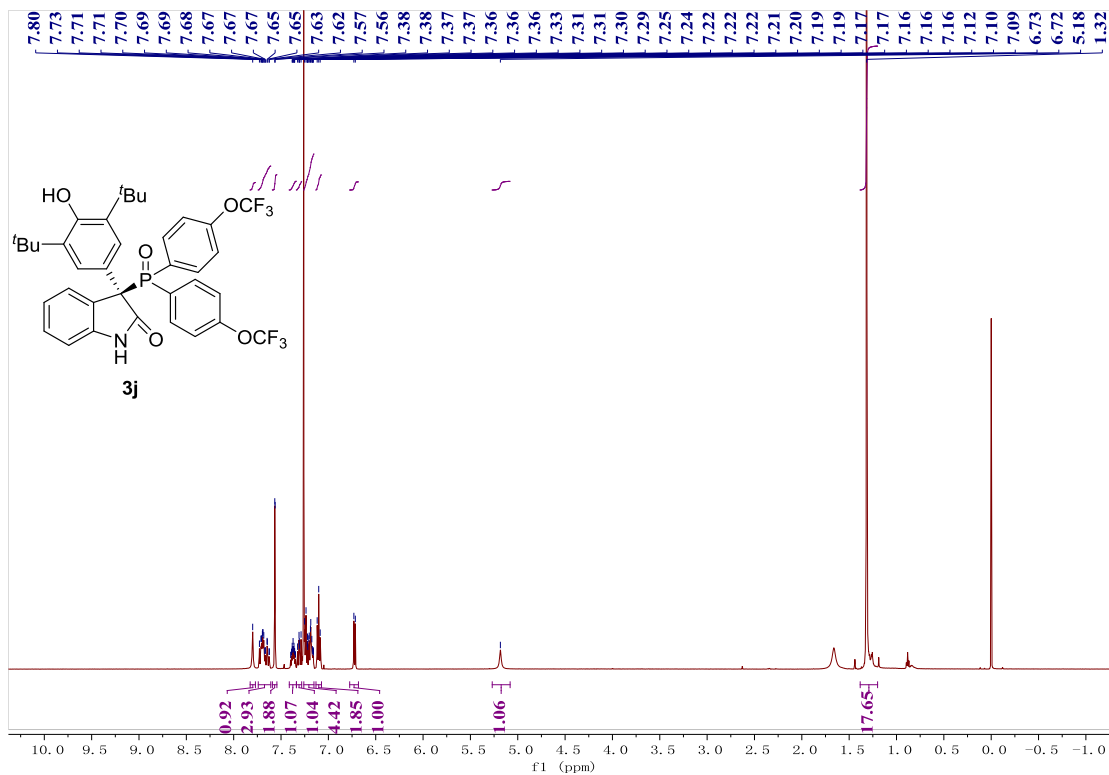

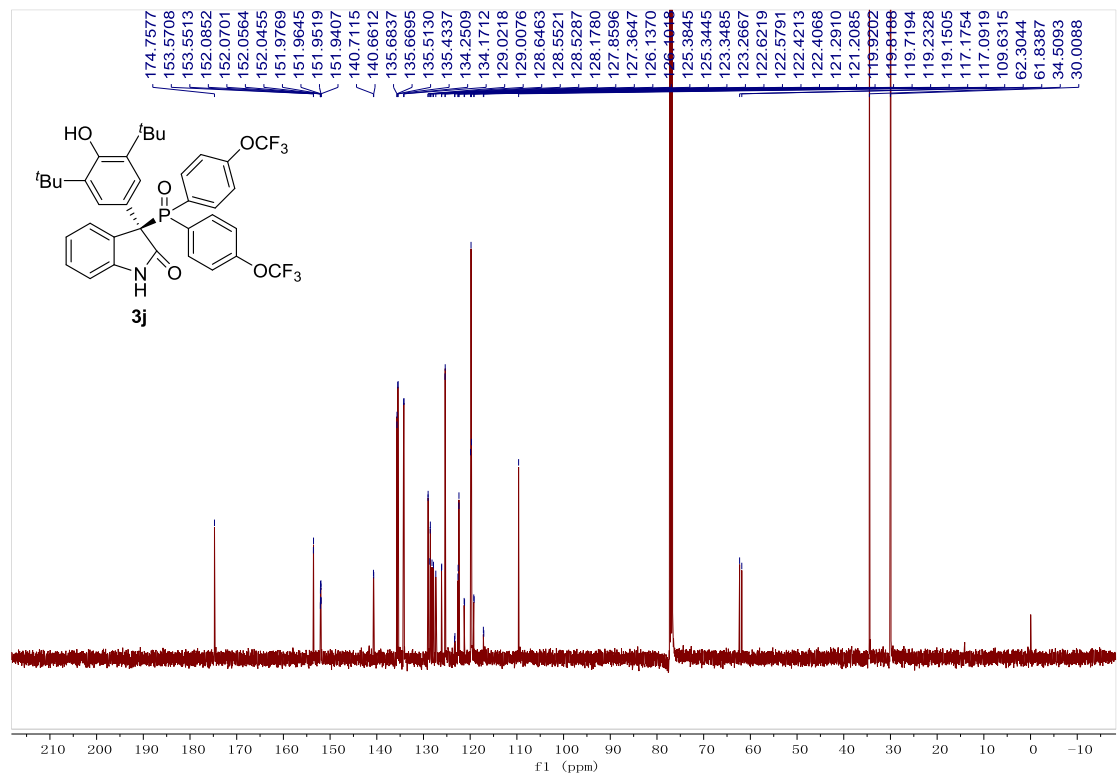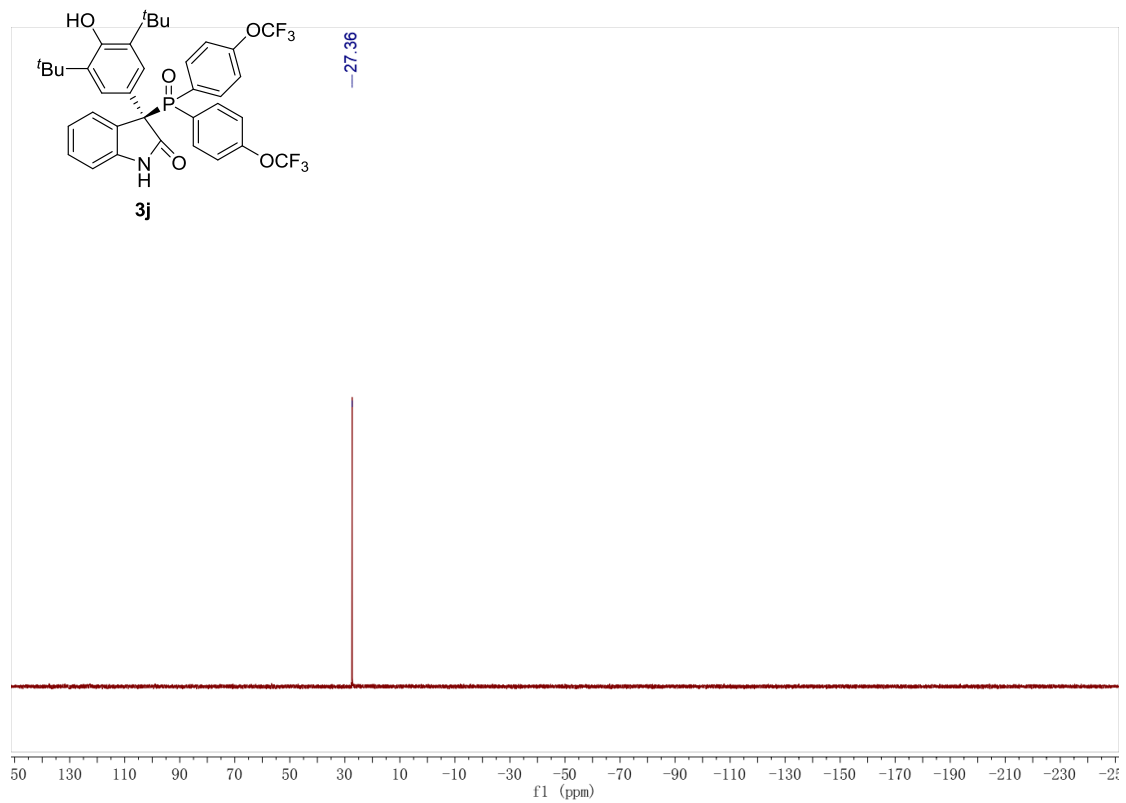

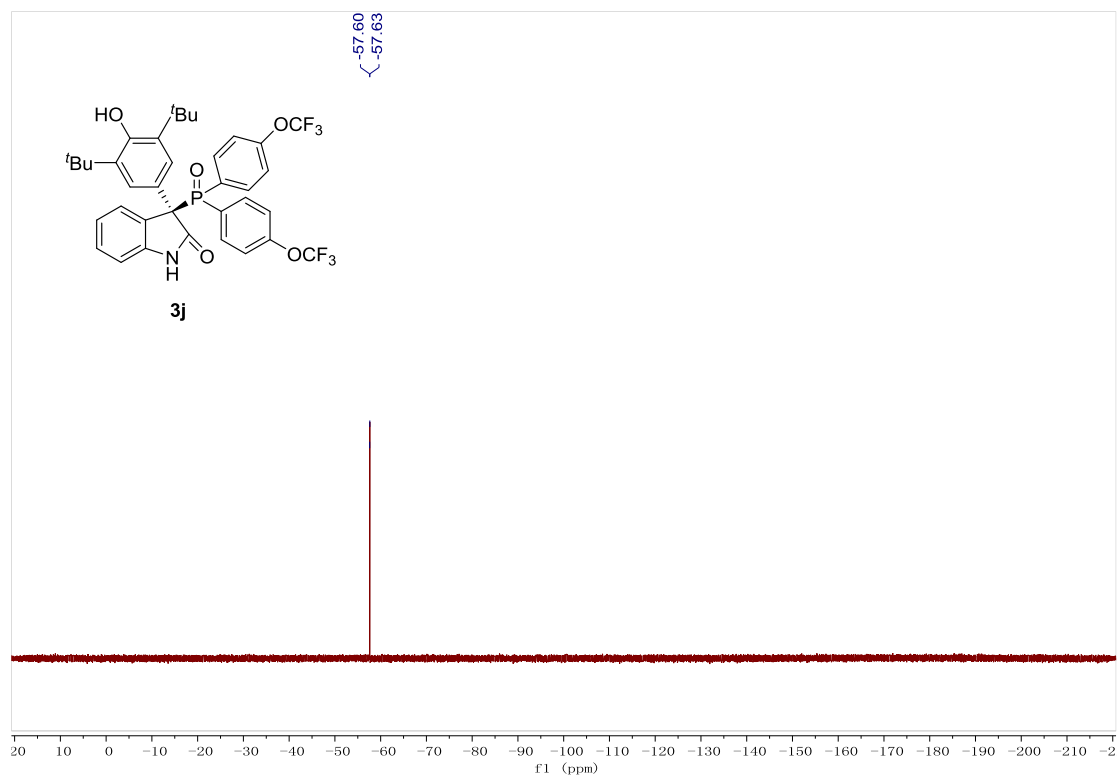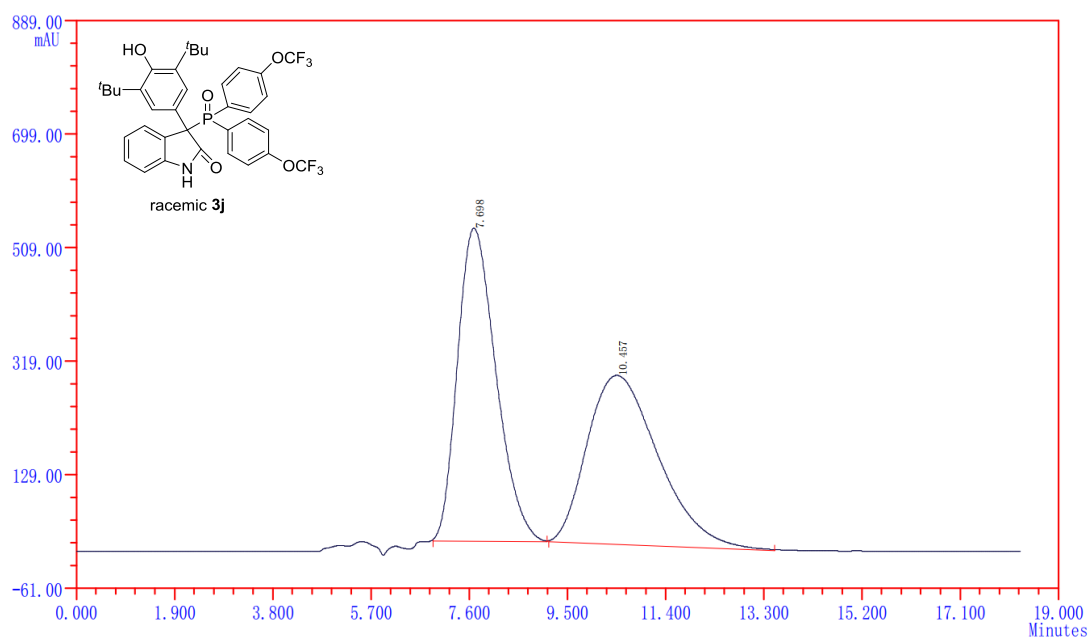

| Peak # | RetTime [Min] | Height [mAu] | Area [mAu*s] | Area %   |
|--------|---------------|--------------|--------------|----------|
| 1      | 7.698         | 523.65       | 27121.834    | 50.008   |
| 2      | 10.457        | 282.84       | 27112.711    | 49.992   |
| Total: |               | 806.49       | 54234.545    | 100.0000 |

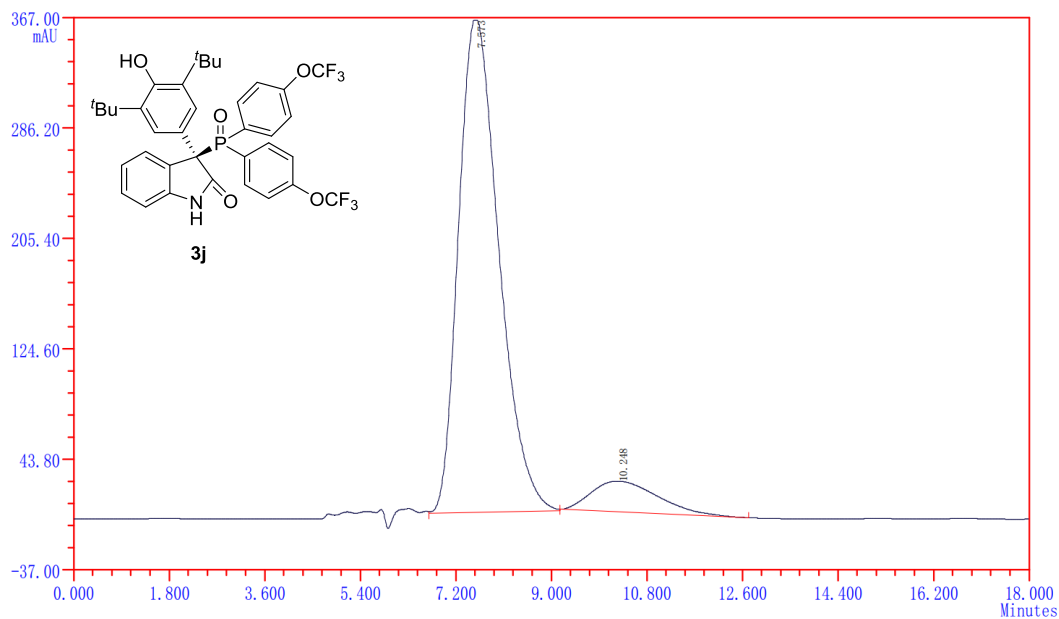

| Peak # | RetTime [Min] | Height [mAu] | Area [mAu*s] | Area %   |
|--------|---------------|--------------|--------------|----------|
| 1      | 7.573         | 362.25       | 19099.044    | 90.670   |
| 2      | 10.248        | 22.46        | 1965.257     | 9.330    |
| Total: |               | 384.71       | 21064.301    | 100.0000 |

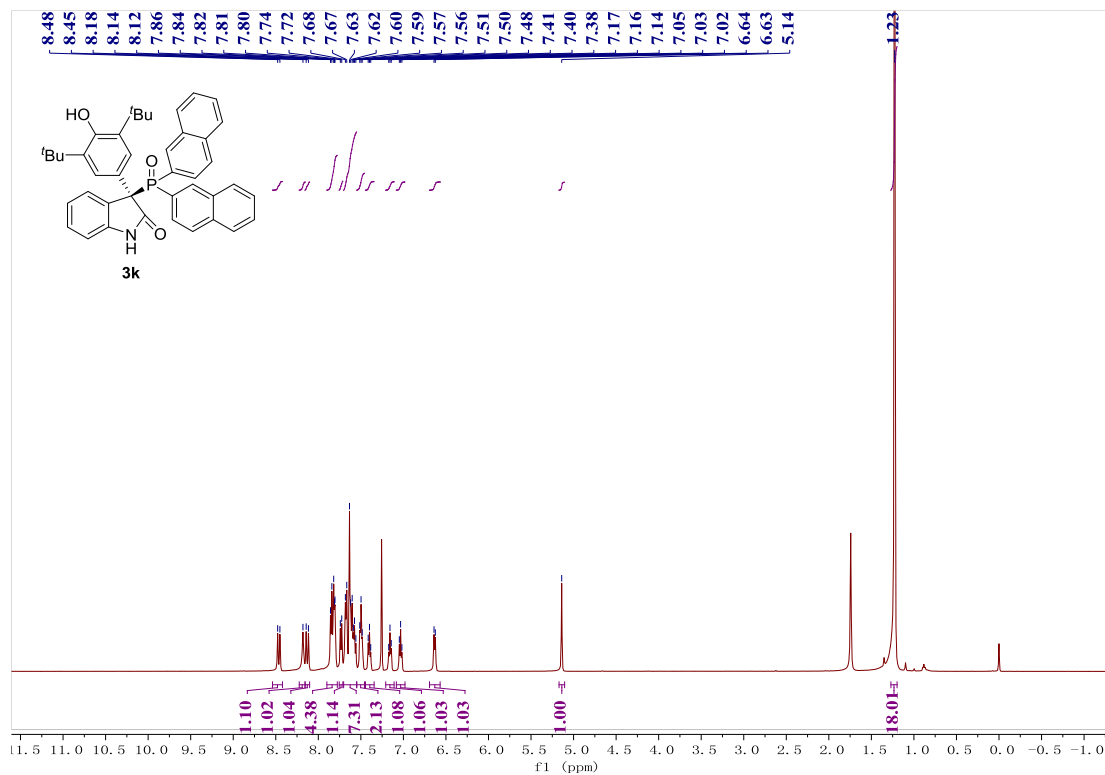



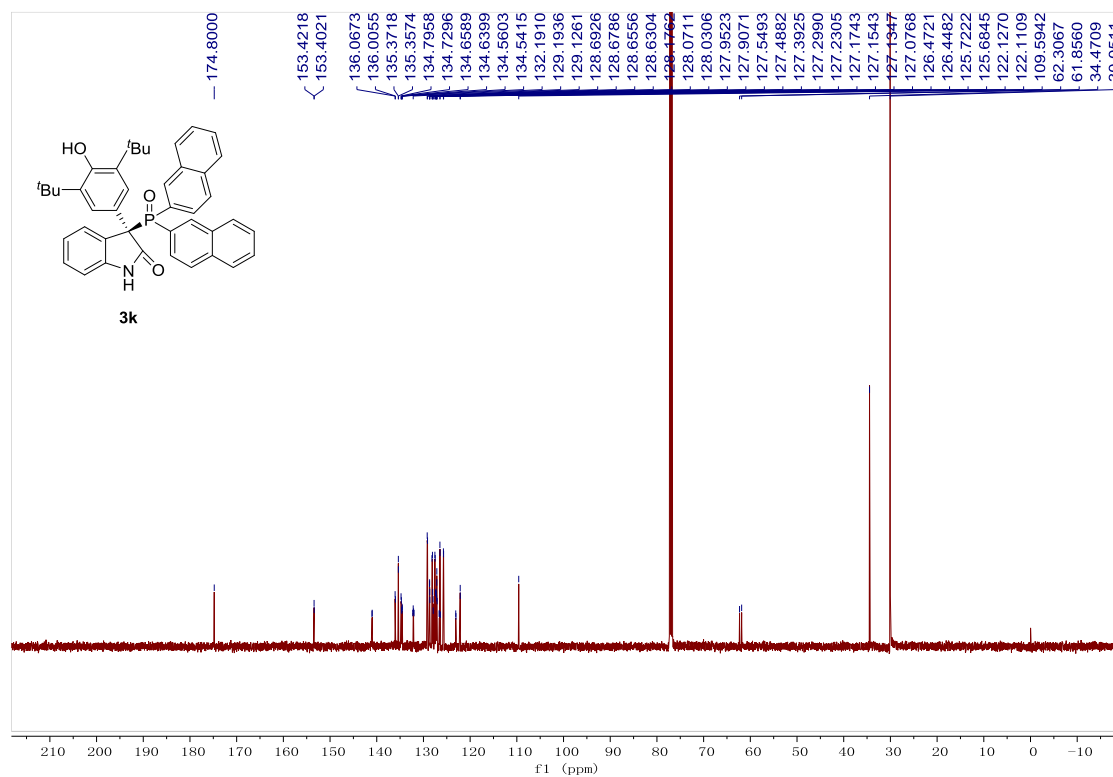

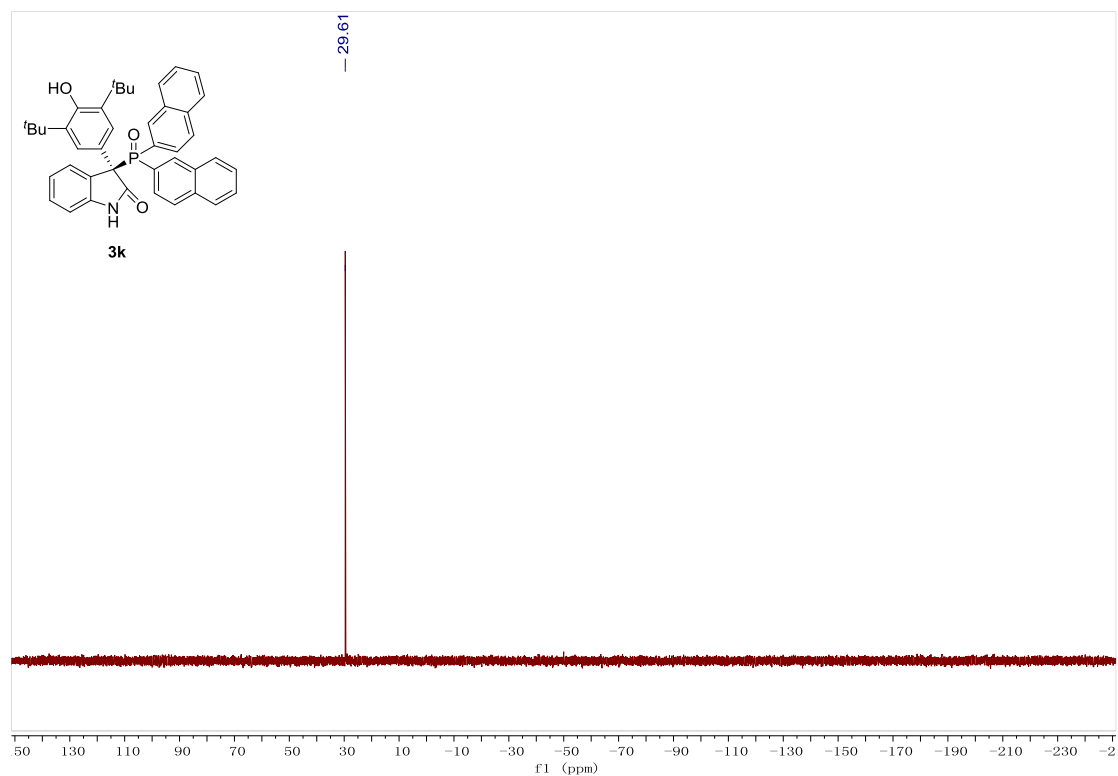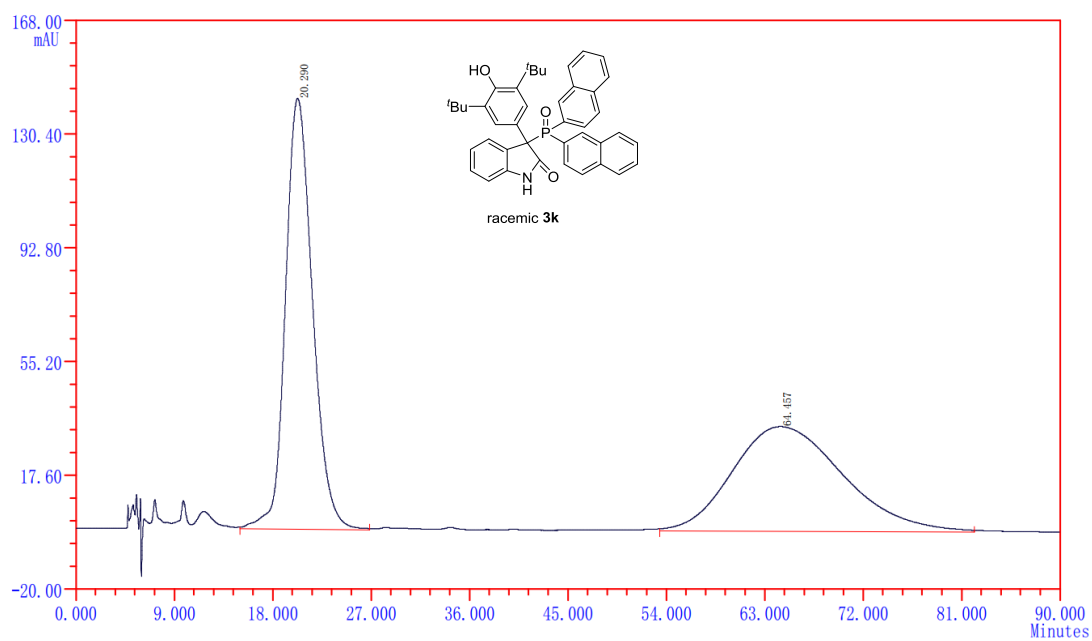

| Peak # | RetTime [Min] | Height [mAu] | Area [mAu*s] | Area %   |
|--------|---------------|--------------|--------------|----------|
| 1      | 20.290        | 142.44       | 24619.352    | 50.119   |
| 2      | 64.457        | 34.66        | 24502.426    | 49.881   |
| Total: |               | 177.10       | 49121.778    | 100.0000 |

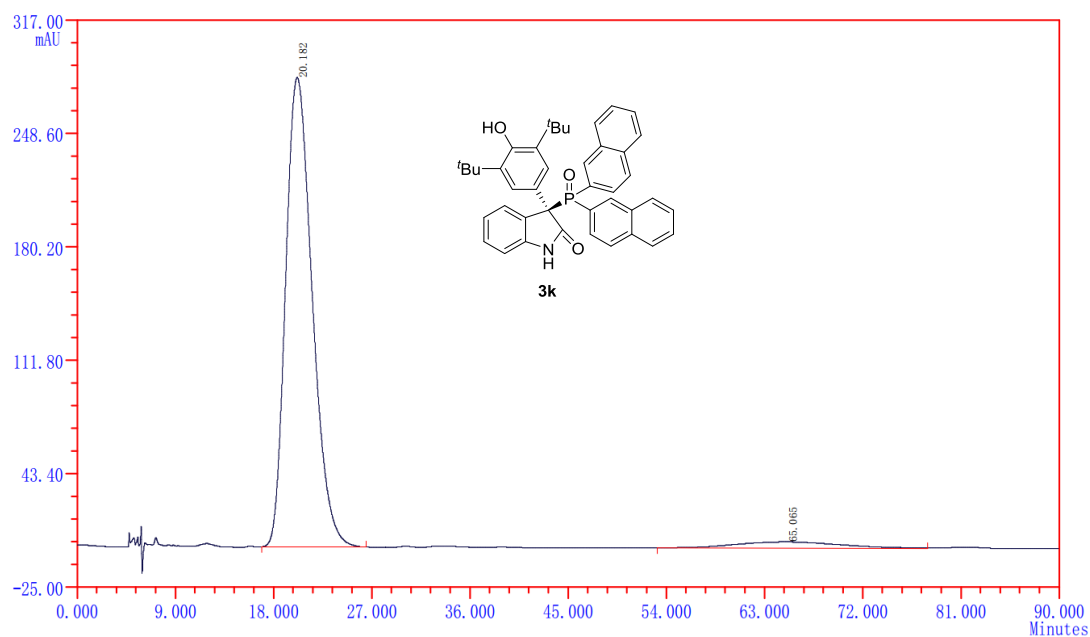

| Peak # | RetTime [Min] | Height [mAu] | Area [mAu*s] | Area %   |
|--------|---------------|--------------|--------------|----------|
| 1      | 20.182        | 283.03       | 47823.974    | 94.727   |
| 2      | 65.065        | 3.86         | 2662.263     | 5.273    |
| Total: |               | 286.89       | 50486.237    | 100.0000 |

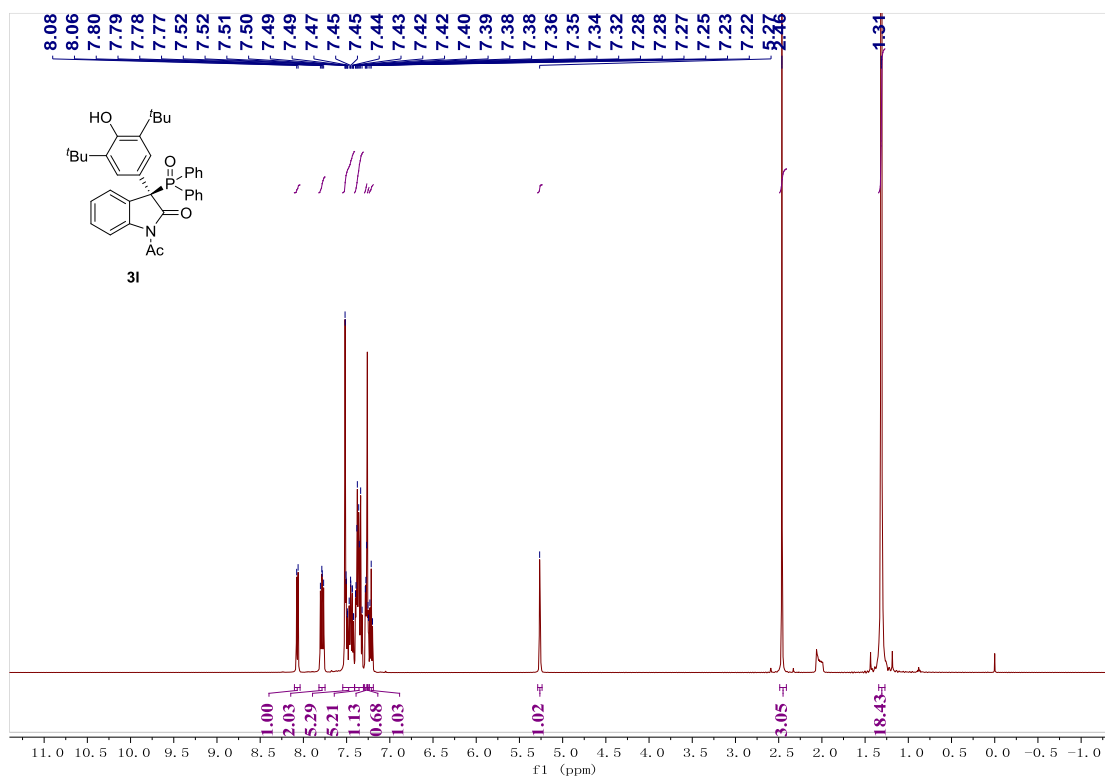

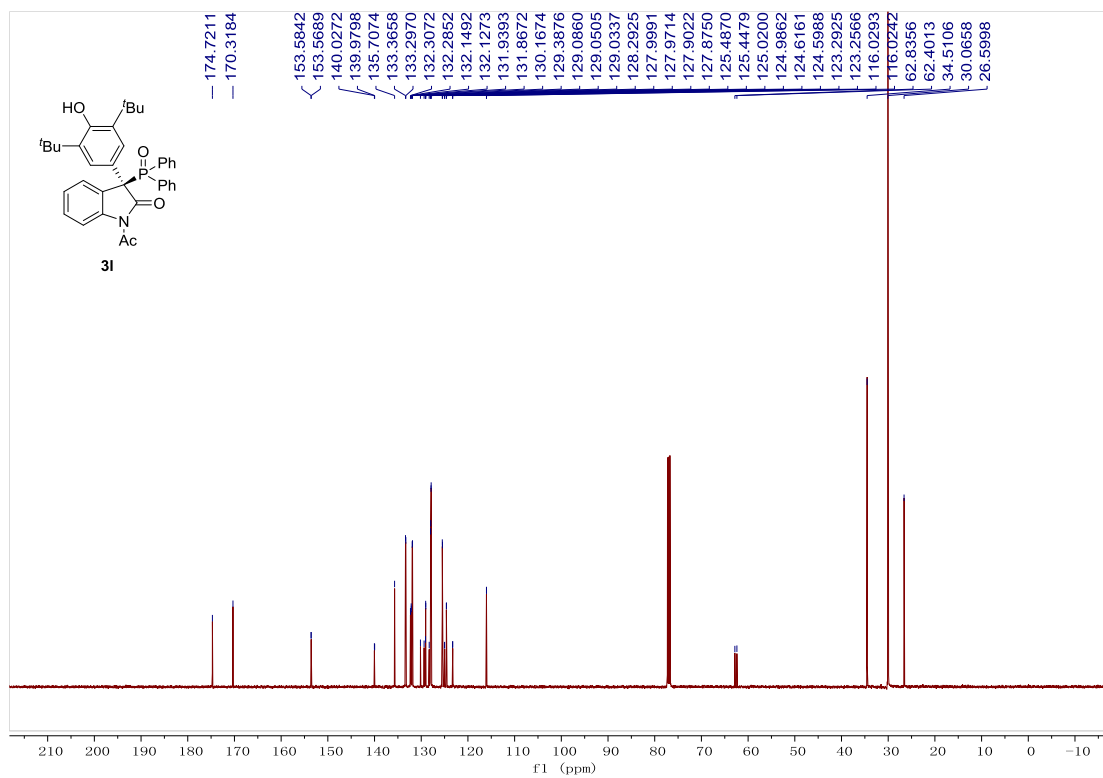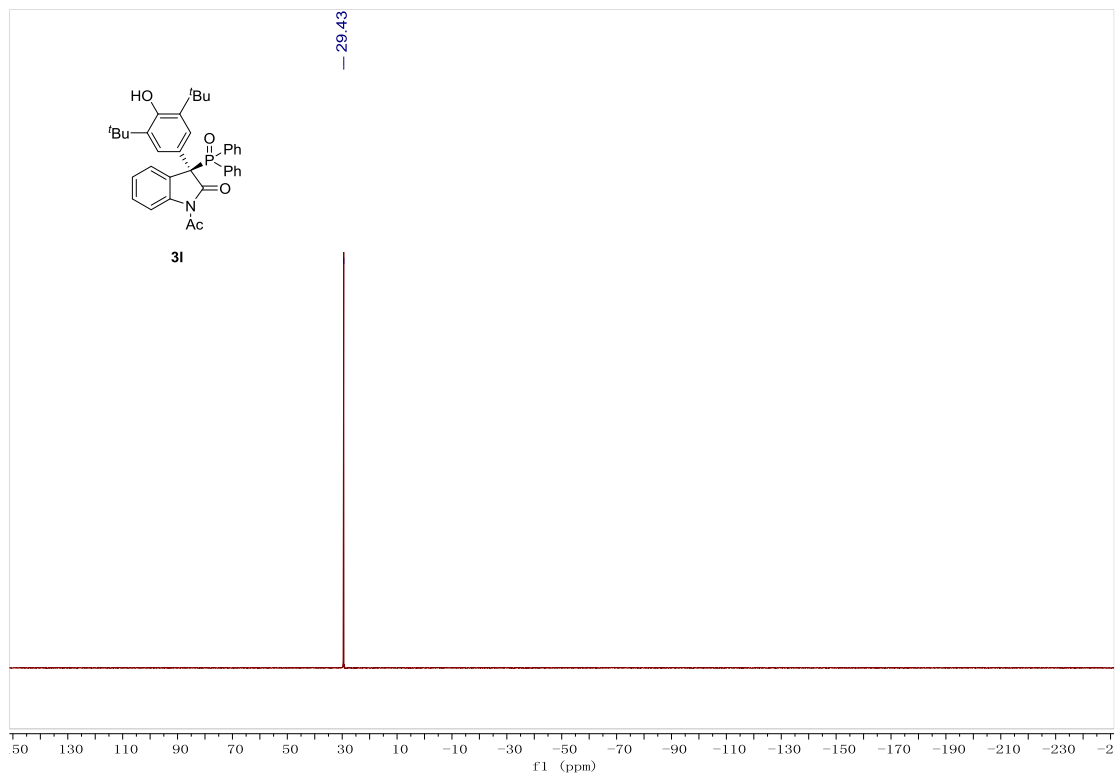

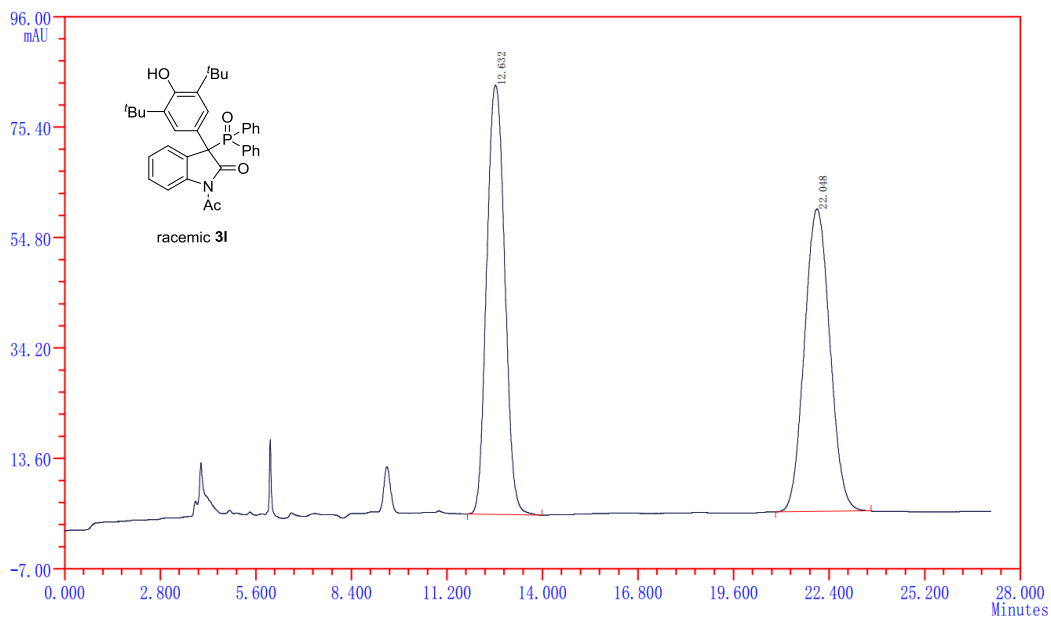

| Peak # | RetTime [Min] | Height [mAu] | Area [mAu*s] | Area %   |
|--------|---------------|--------------|--------------|----------|
| 1      | 12.632        | 80.07        | 2940.826     | 50.087   |
| 2      | 22.048        | 56.48        | 2930.600     | 49.913   |
| Total: |               | 136.55       | 5871.426     | 100.0000 |

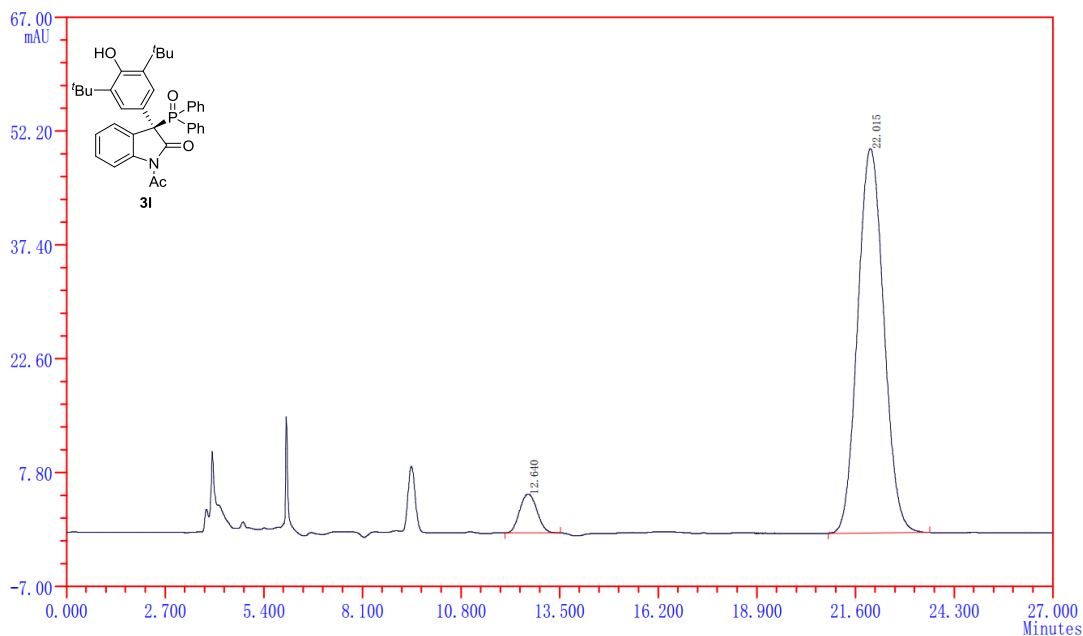

| Peak # | RetTime [Min] | Height [mAu] | Area [mAu*s] | Area %   |
|--------|---------------|--------------|--------------|----------|
| 1      | 12.640        | 5.08         | 167.576      | 6.311    |
| 2      | 22.015        | 49.98        | 2487.613     | 93.689   |
| Total: |               | 55.06        | 2655.189     | 100.0000 |

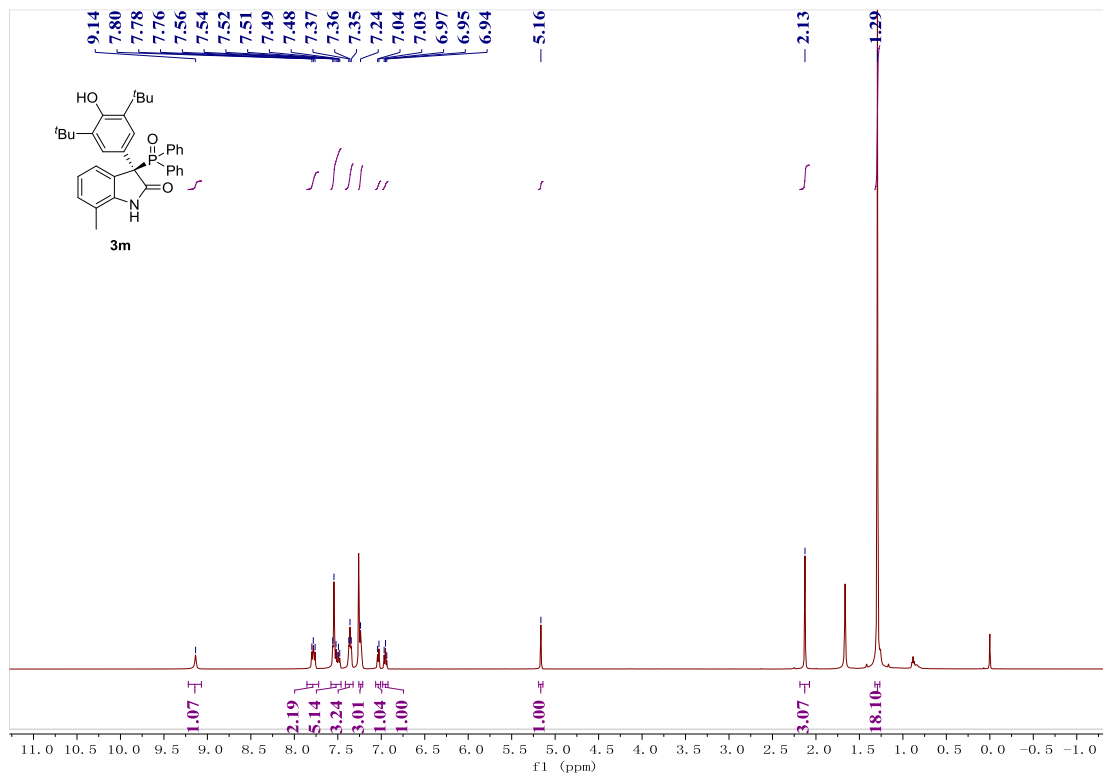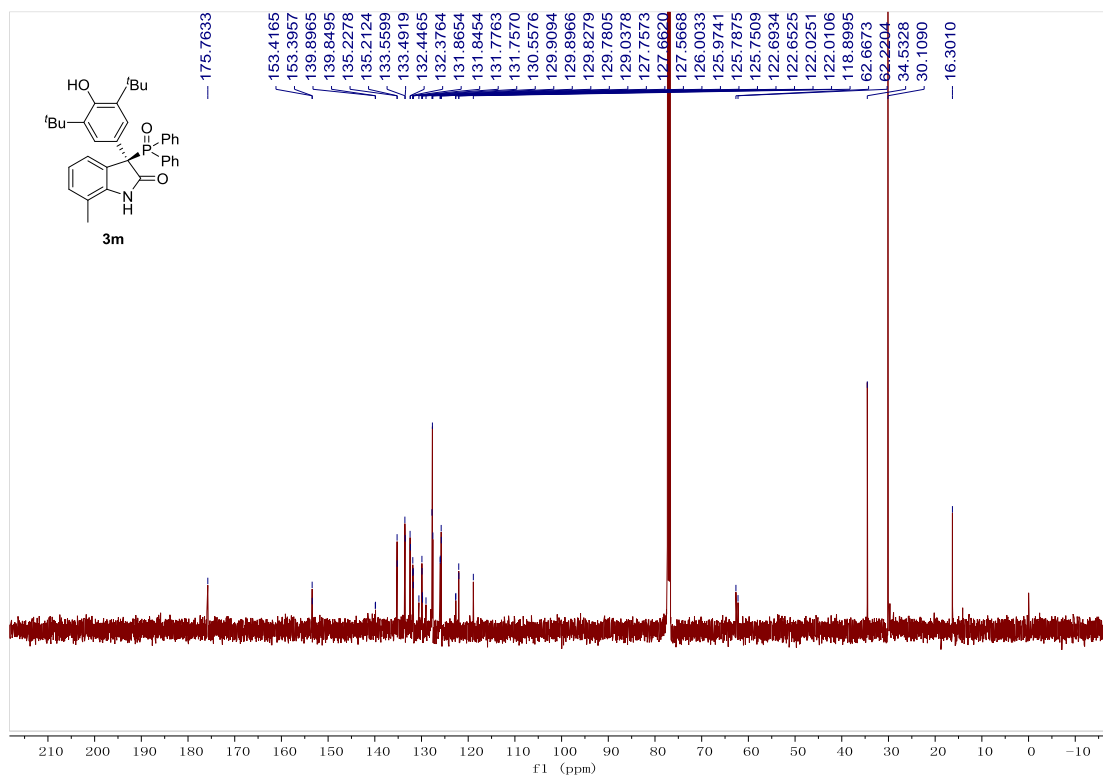

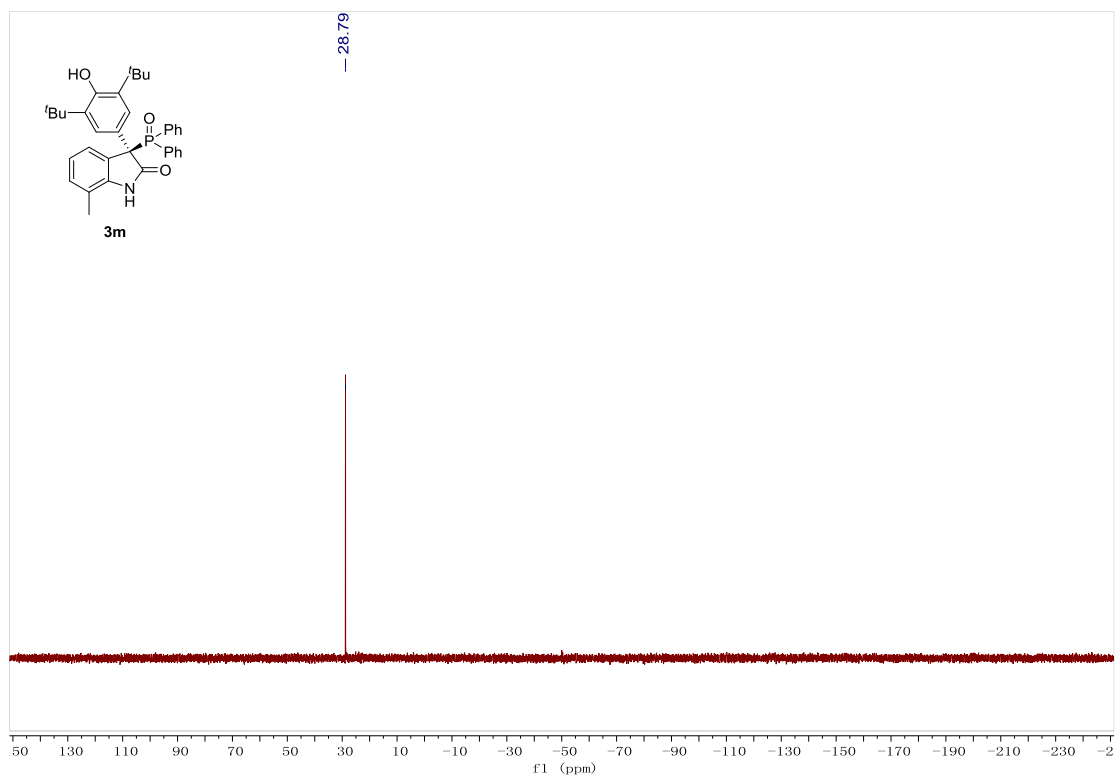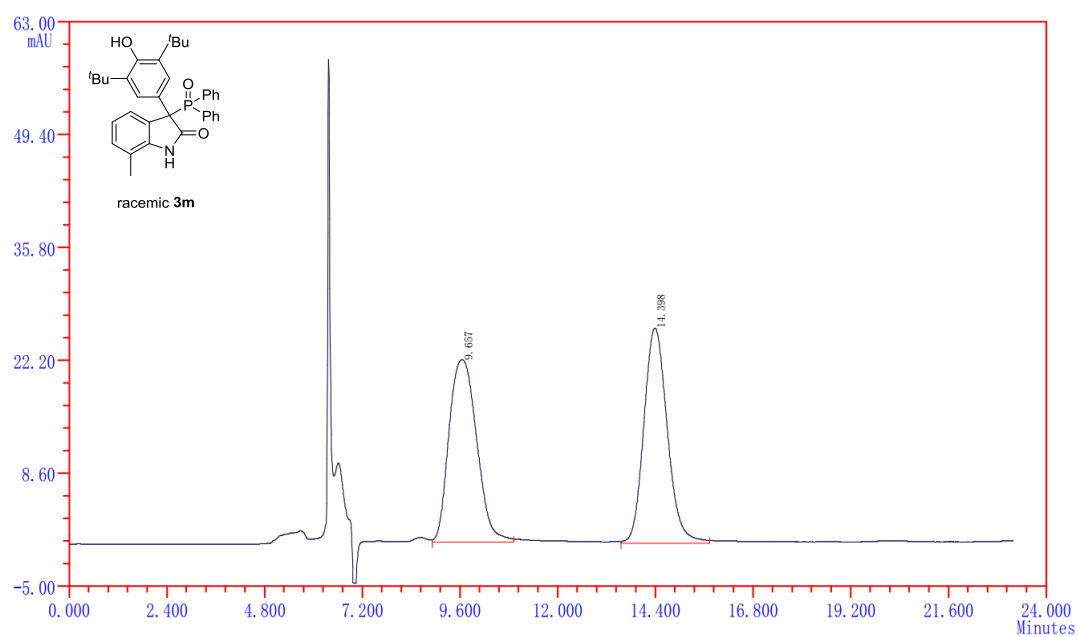

| Peak # | RetTime [Min] | Height [mAu] | Area [mAu*s] | Area %   |
|--------|---------------|--------------|--------------|----------|
| 1      | 9.657         | 21.97        | 1041.091     | 49.905   |
| 2      | 14.398        | 25.95        | 1045.062     | 50.095   |
| Total: |               | 47.92        | 2086.153     | 100.0000 |

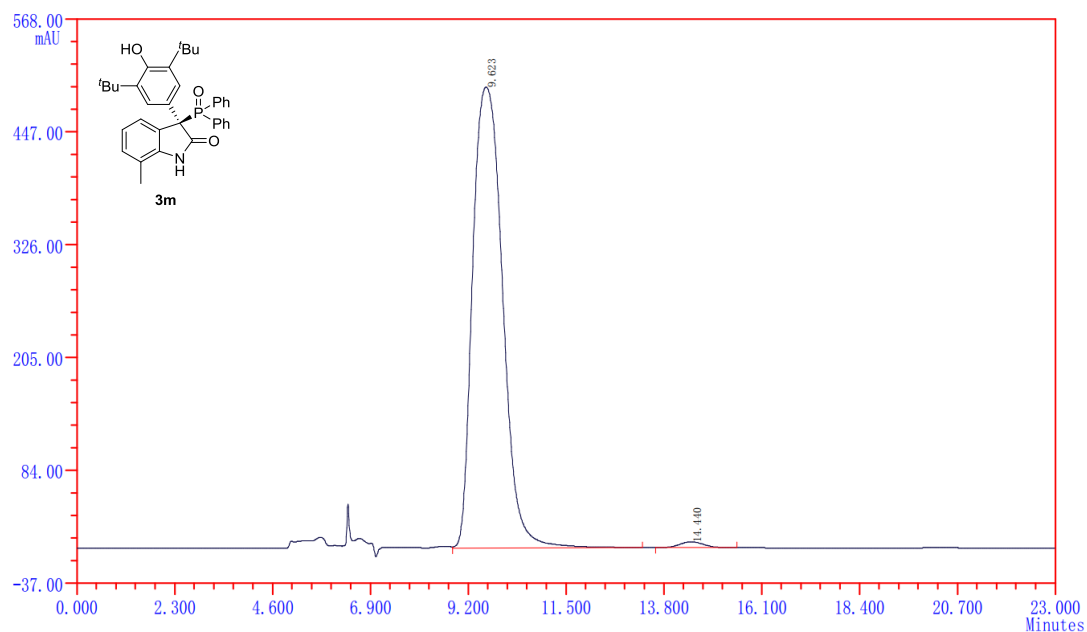

| Peak # | RetTime [Min] | Height [mAu] | Area [mAu*s] | Area %   |
|--------|---------------|--------------|--------------|----------|
| 1      | 9.623         | 494.25       | 24128.201    | 98.973   |
| 2      | 14.440        | 6.34         | 250.376      | 1.027    |
| Total: |               | 500.59       | 24378.576    | 100.0000 |

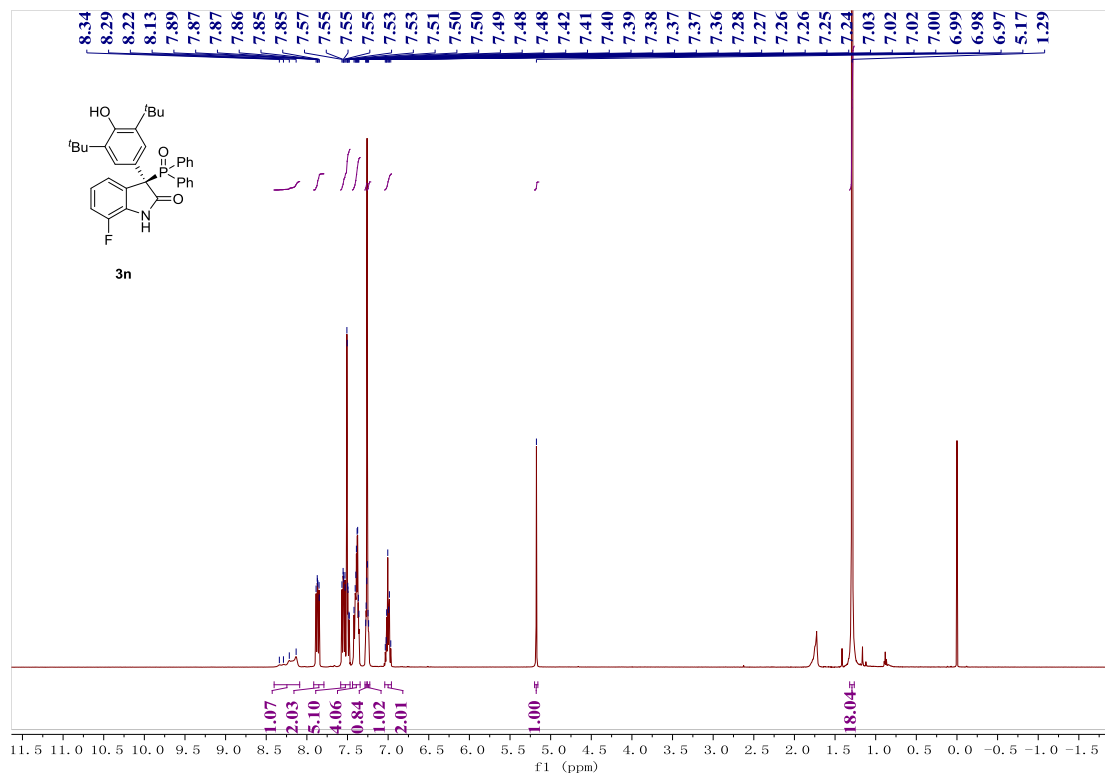



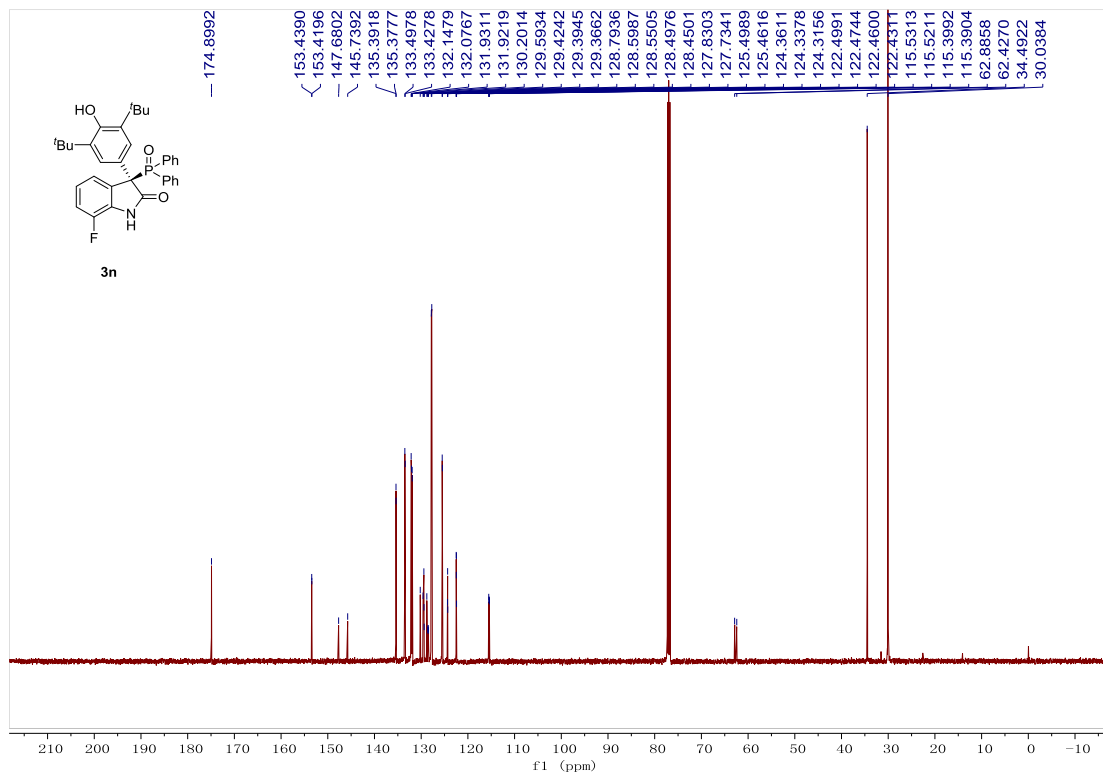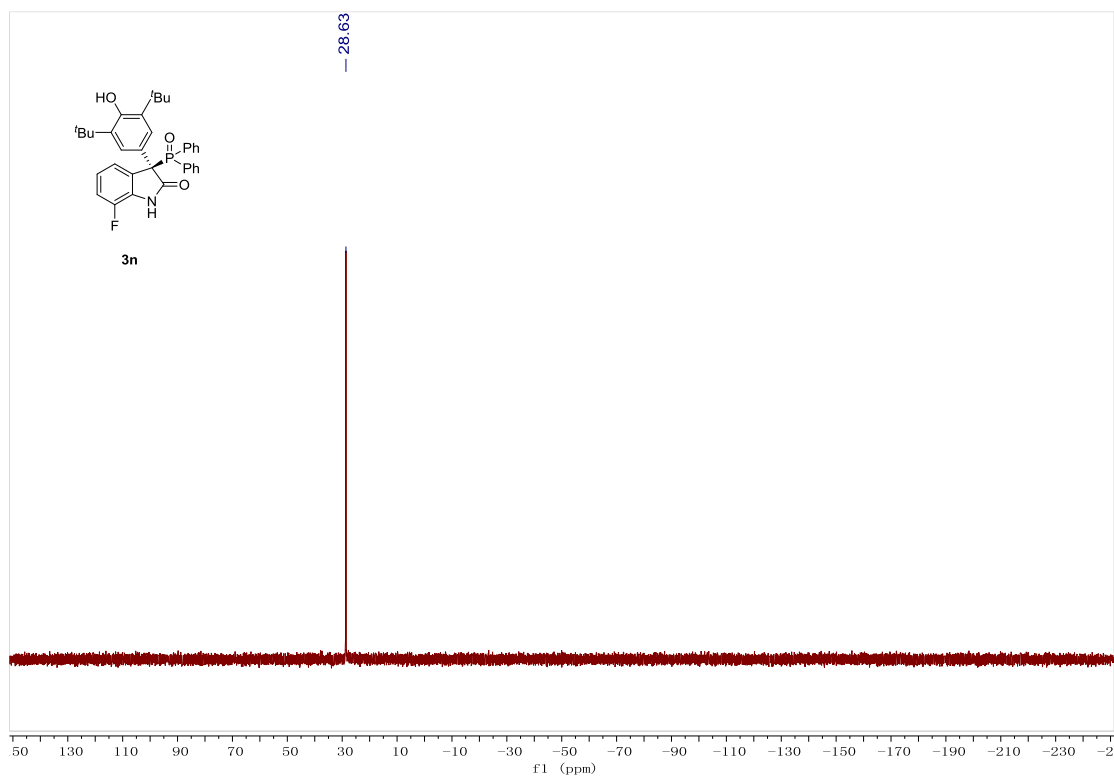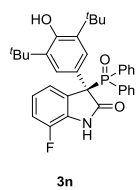

S57

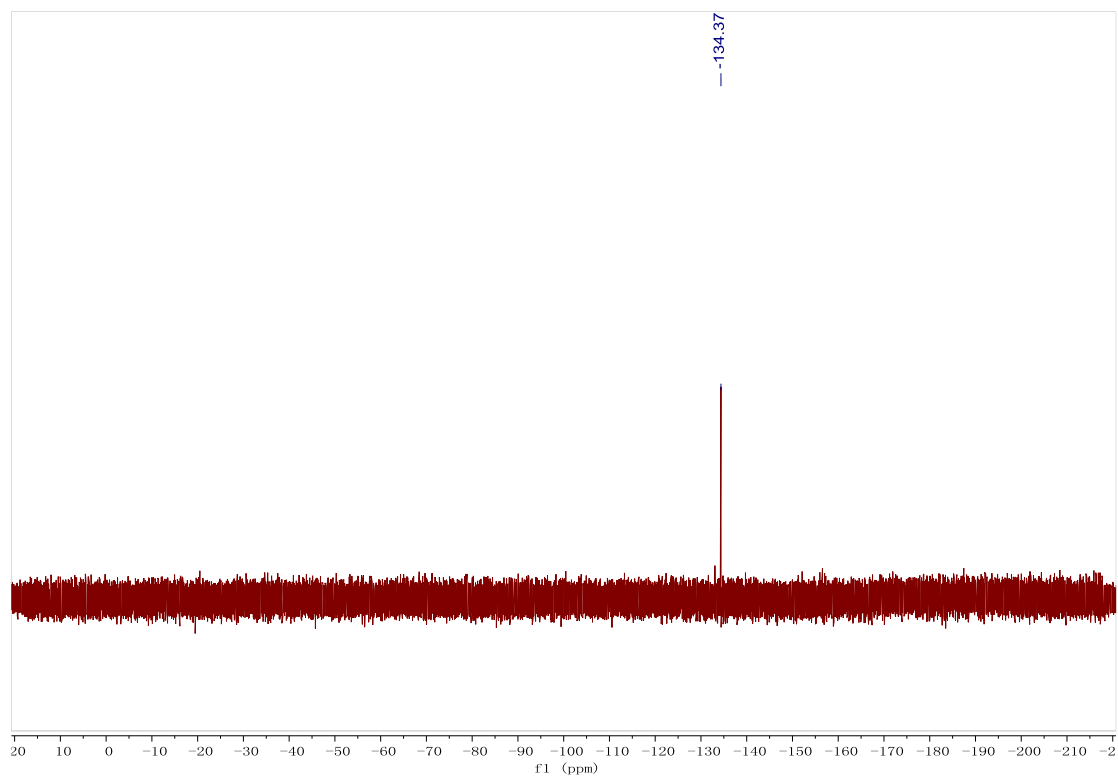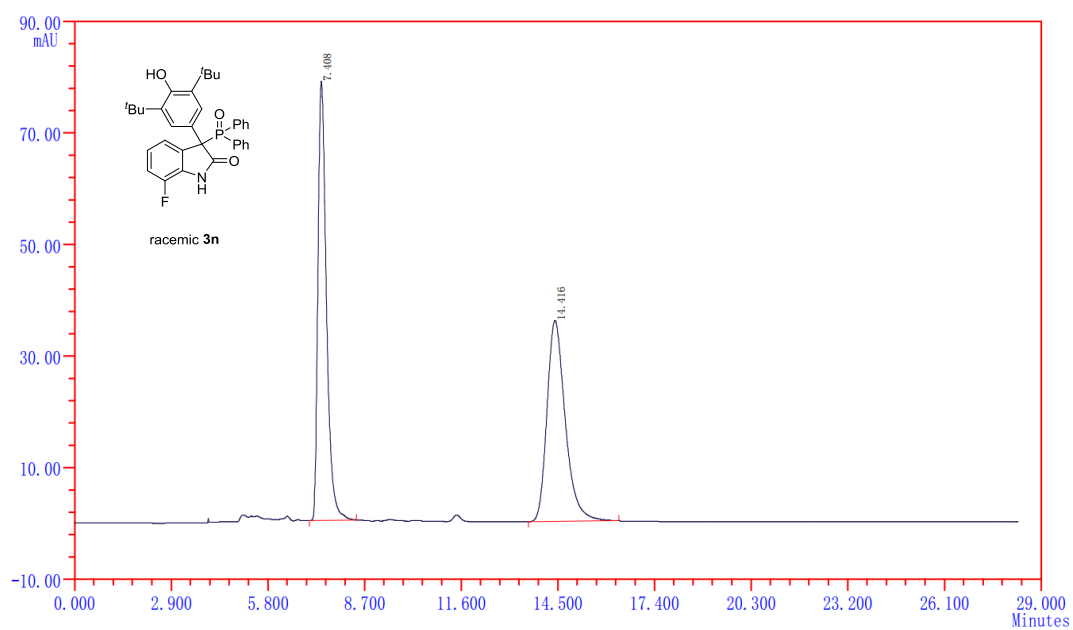

| Peak # | RetTime [Min] | Height [mAu] | Area [mAu*s] | Area %   |
|--------|---------------|--------------|--------------|----------|
| 1      | 7.408         | 78.75        | 1393.744     | 50.152   |
| 2      | 14.416        | 36.04        | 1385.299     | 49.848   |
| Total: |               | 114.79       | 2779.043     | 100.0000 |

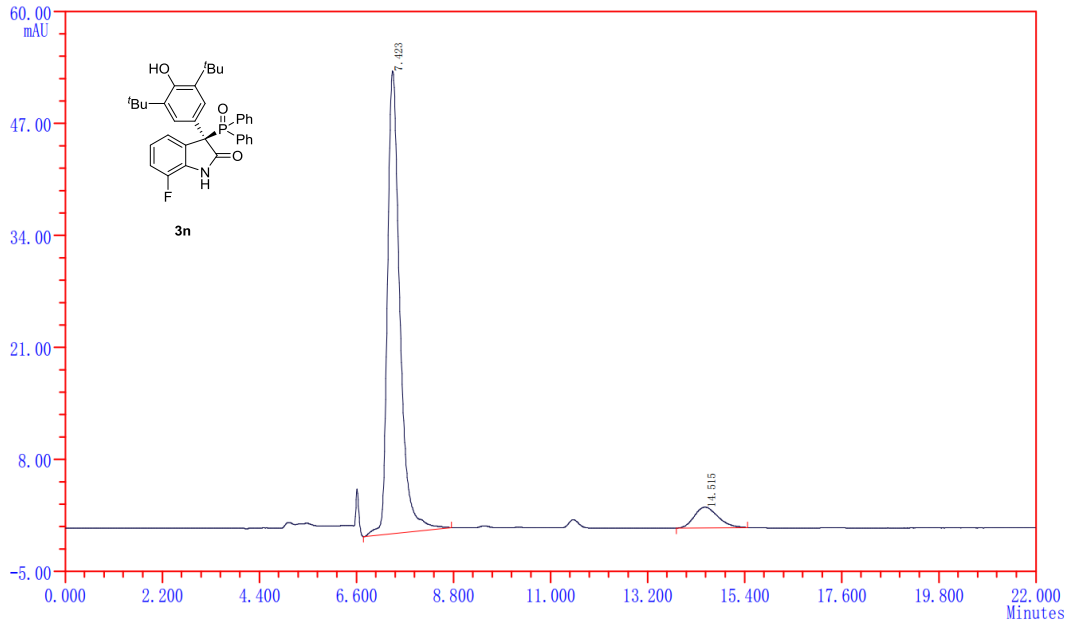

| Peak # | RetTime [Min] | Height [mAu] | Area [mAu*s] | Area %   |
|--------|---------------|--------------|--------------|----------|
| 1      | 7.423         | 53.77        | 1053.744     | 92.140   |
| 2      | 14.515        | 2.41         | 89.885       | 7.860    |
| Total: |               | 56.18        | 1143.629     | 100.0000 |

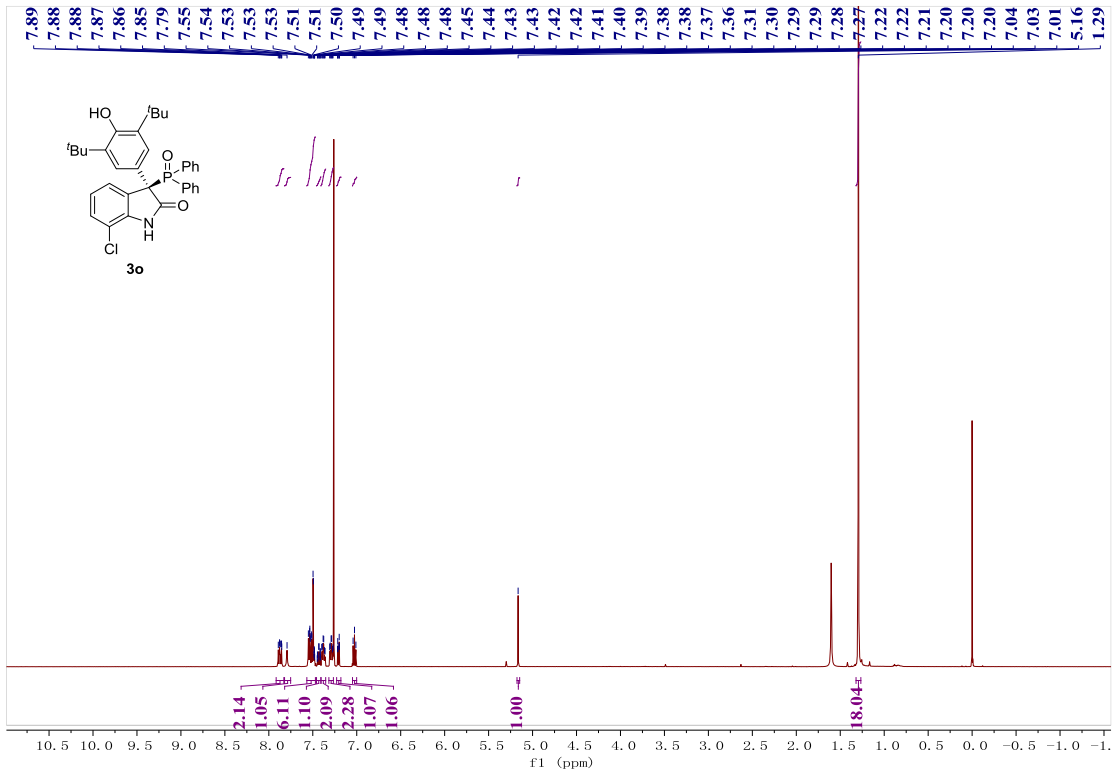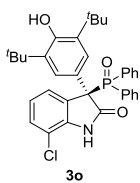

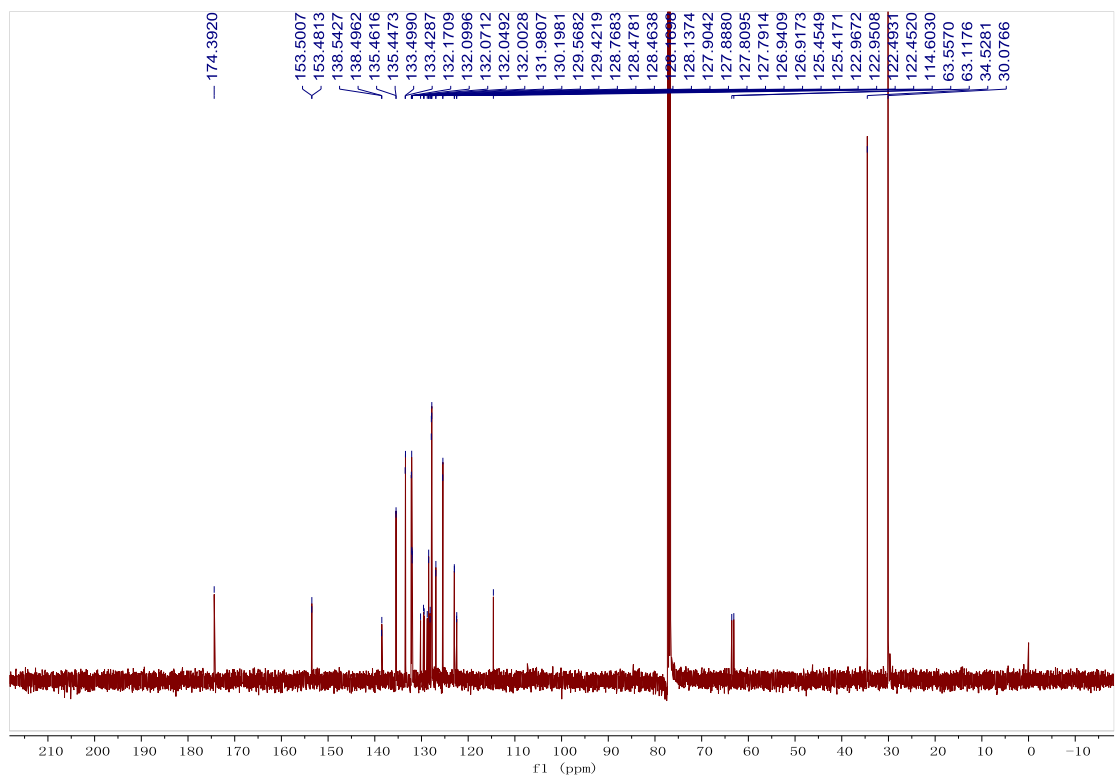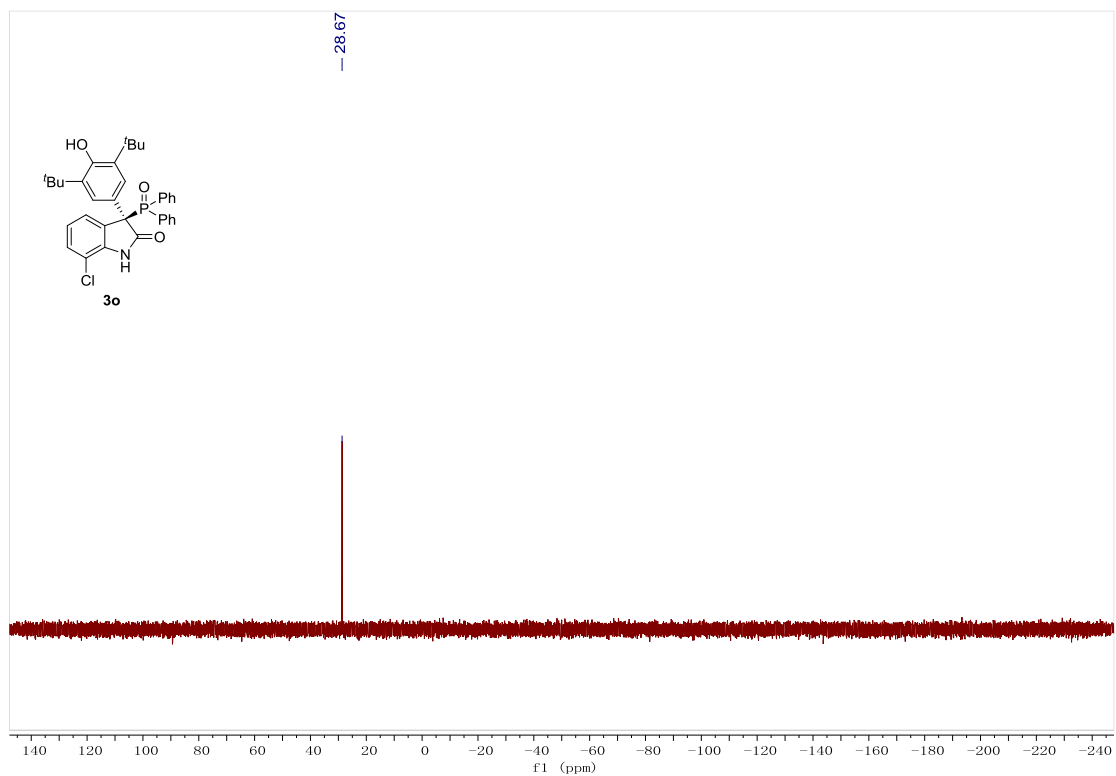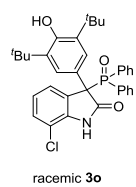

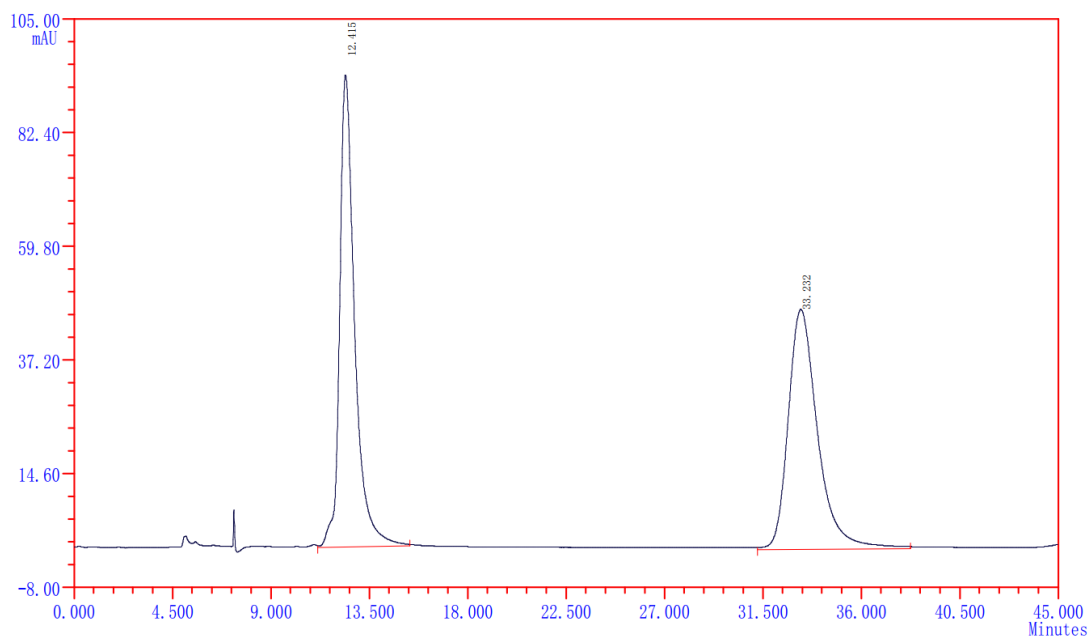

| Peak # | RetTime [Min] | Height [mAu] | Area [mAu*s] | Area %   |
|--------|---------------|--------------|--------------|----------|
| 1      | 12.415        | 93.81        | 4482.293     | 49.966   |
| 2      | 33.232        | 47.72        | 4488.328     | 50.034   |
| Total: |               | 141.53       | 8970.621     | 100.0000 |

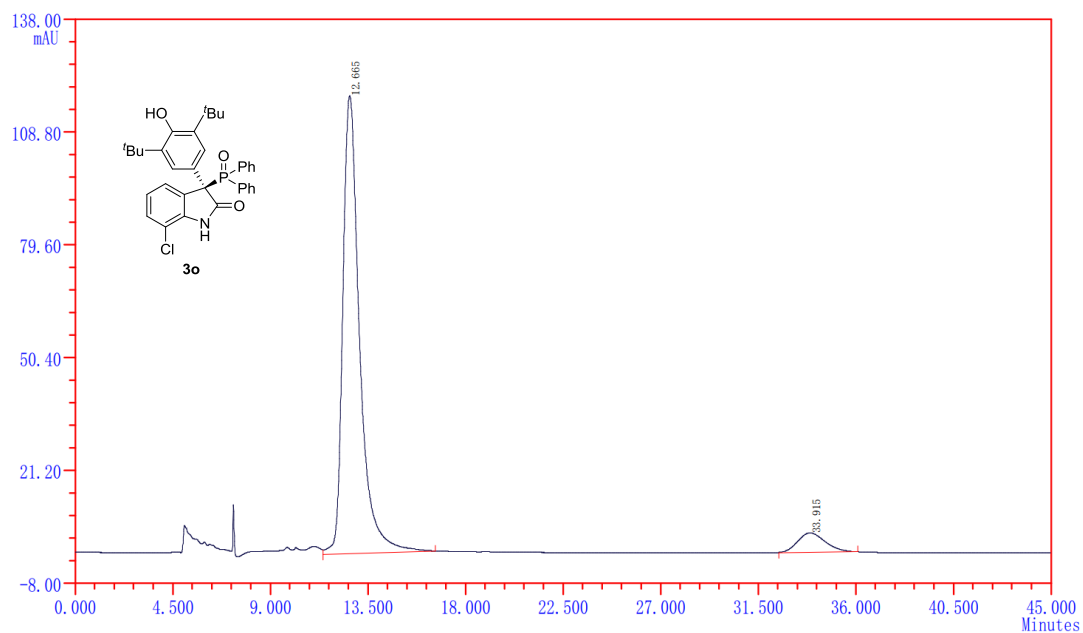

| Peak # | RetTime [Min] | Height [mAu] | Area [mAu*s] | Area %   |
|--------|---------------|--------------|--------------|----------|
| 1      | 12.665        | 118.52       | 6386.209     | 93.560   |
| 2      | 33.915        | 4.98         | 439.591      | 6.440    |
| Total: |               | 123.50       | 6825.800     | 100.0000 |

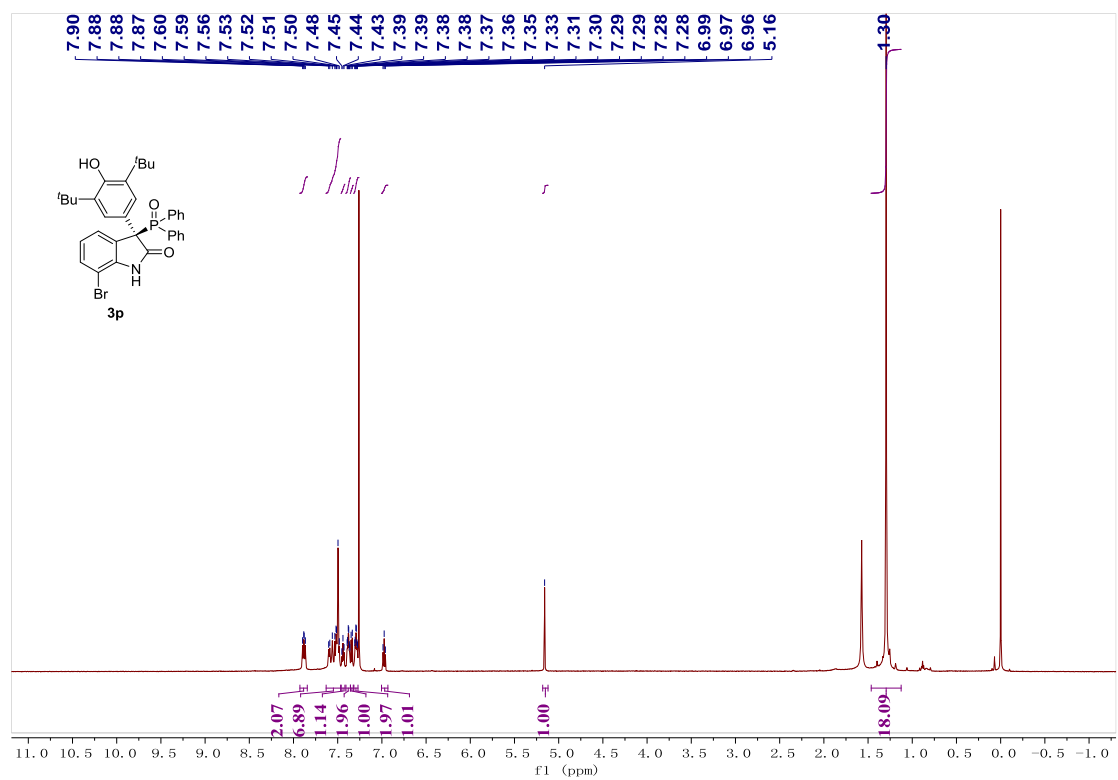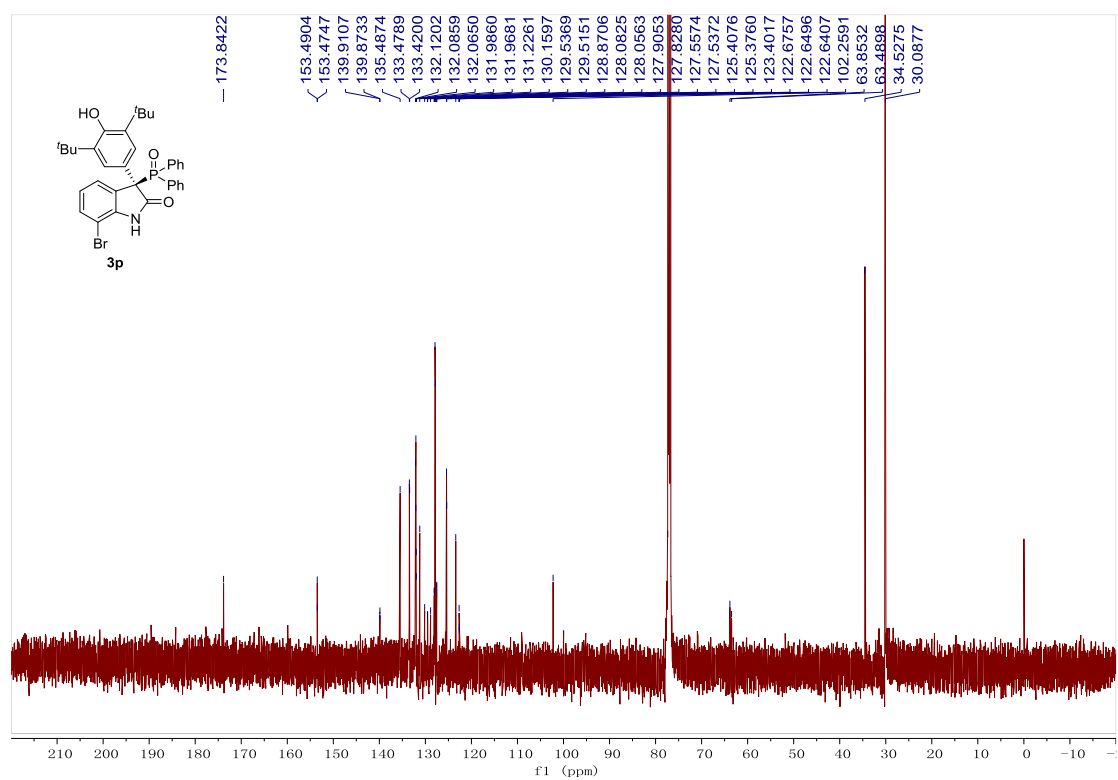

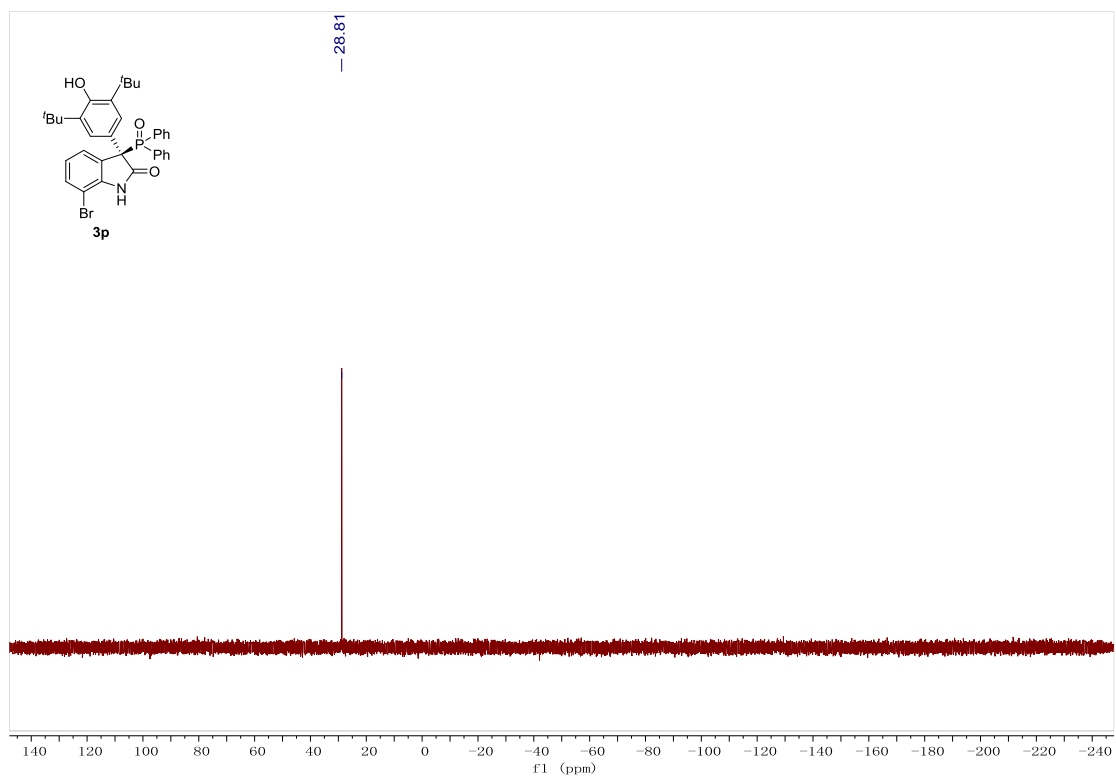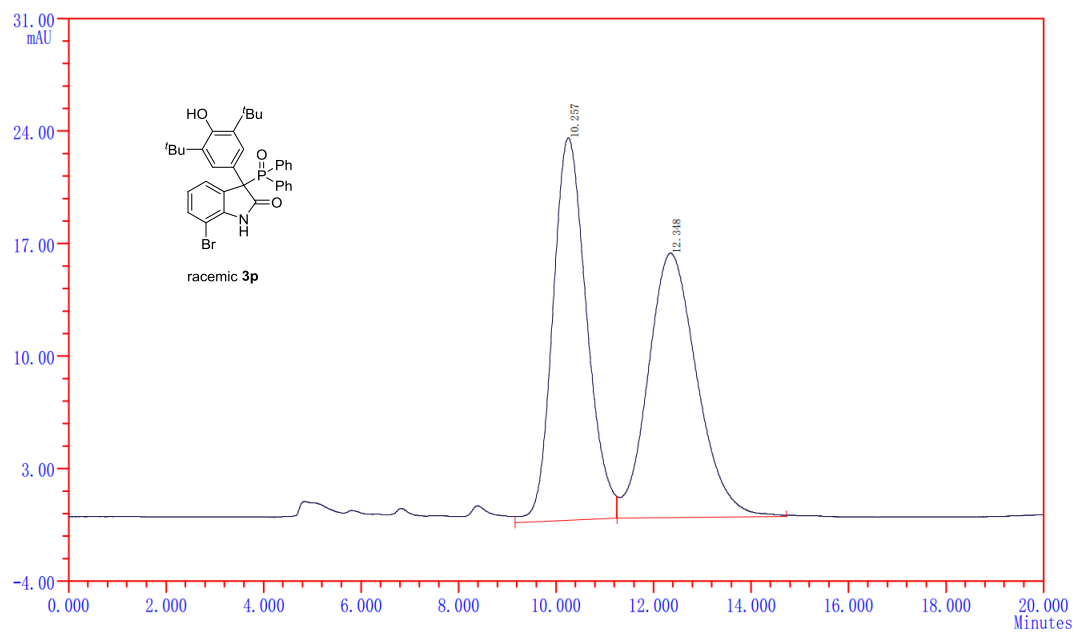

| Peak # | RetTime [Min] | Height [mAu] | Area [mAu*s] | Area %   |
|--------|---------------|--------------|--------------|----------|
| 1      | 10.257        | 23.79        | 1145.604     | 49.959   |
| 2      | 12.348        | 16.44        | 1147.474     | 50.041   |
| Total: |               | 40.23        | 2293.079     | 100.0000 |

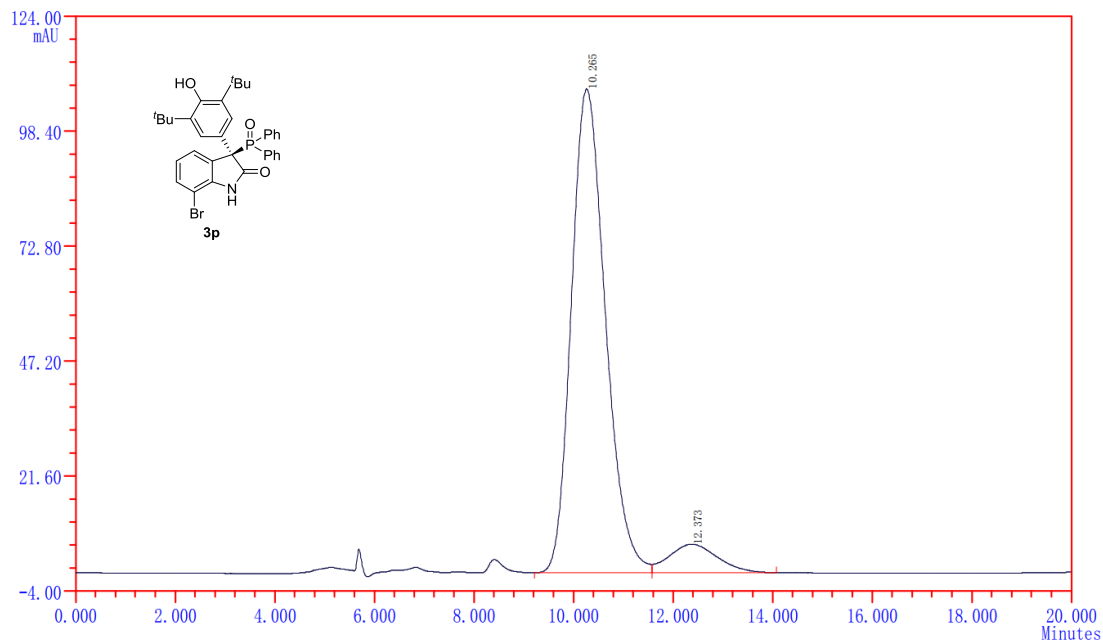

| Peak # | RetTime [Min] | Height [mAu] | Area [mAu*s] | Area %   |
|--------|---------------|--------------|--------------|----------|
| 1      | 10.265        | 107.75       | 5119.707     | 92.261   |
| 2      | 12.373        | 6.34         | 429.453      | 7.739    |
| Total: |               | 114.09       | 5549.160     | 100.0000 |

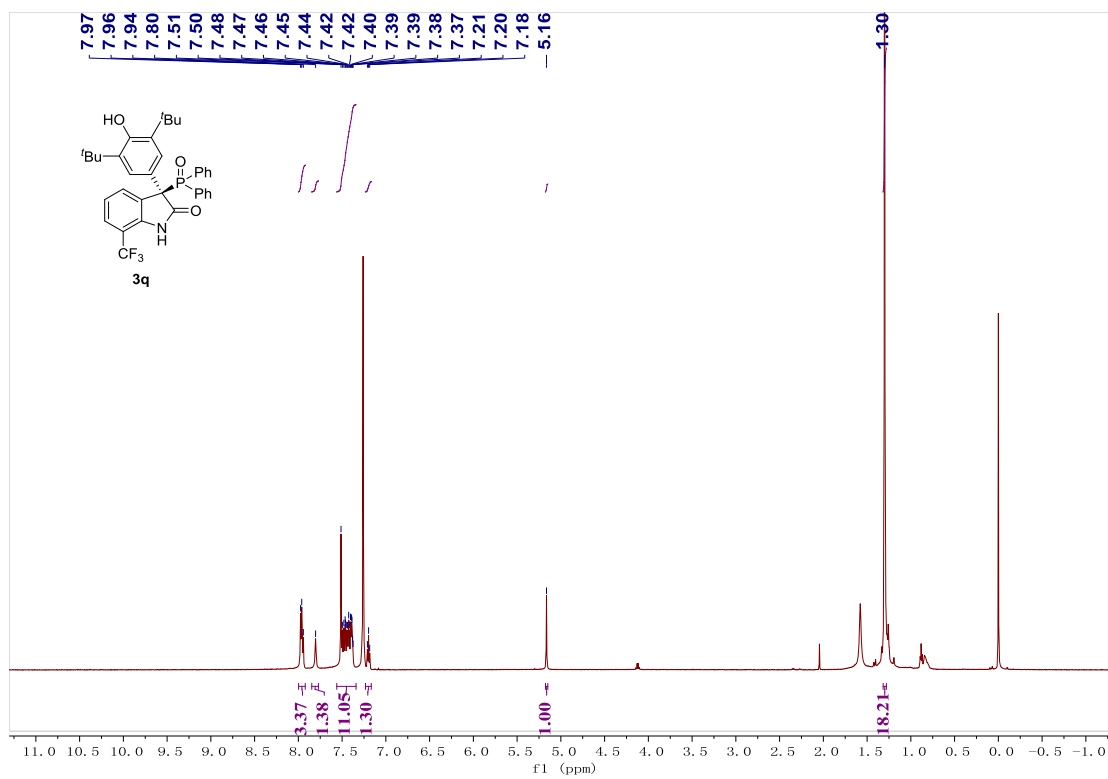



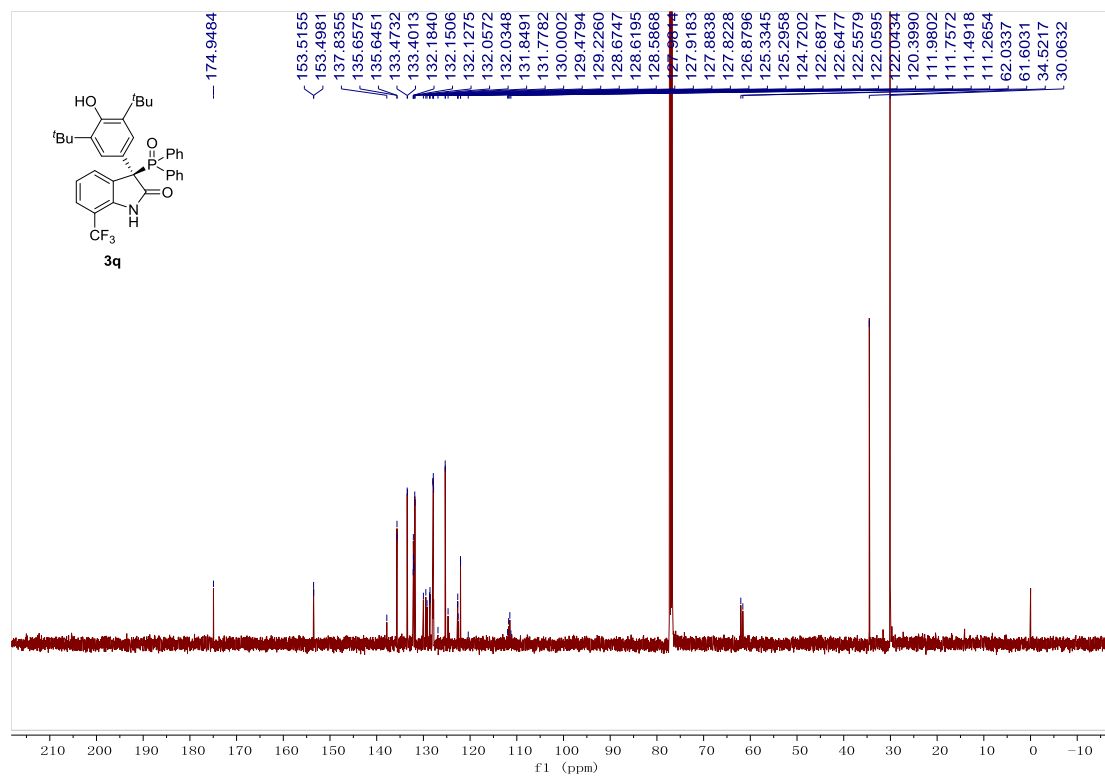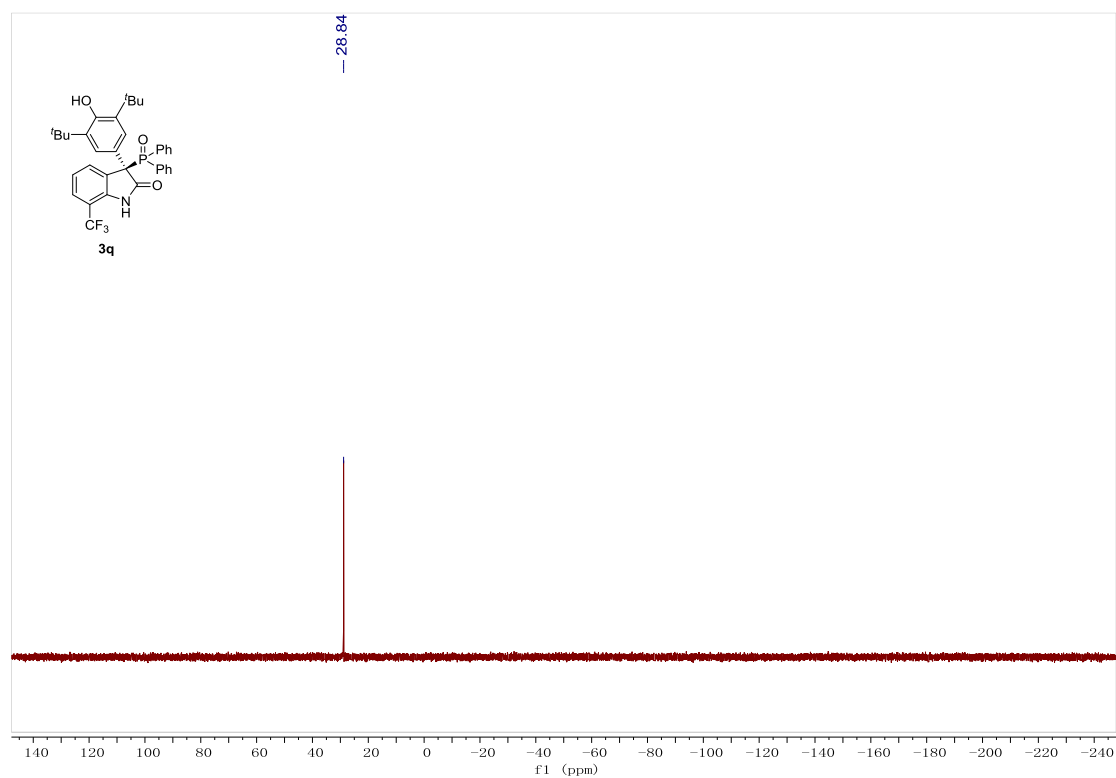

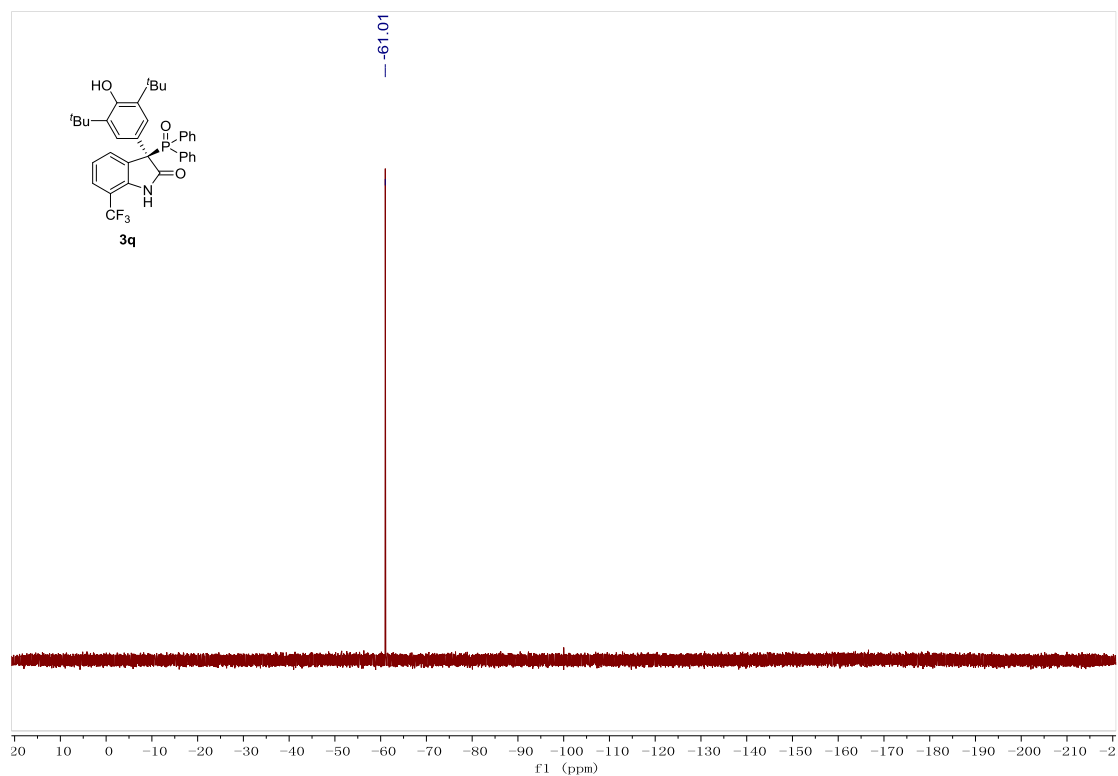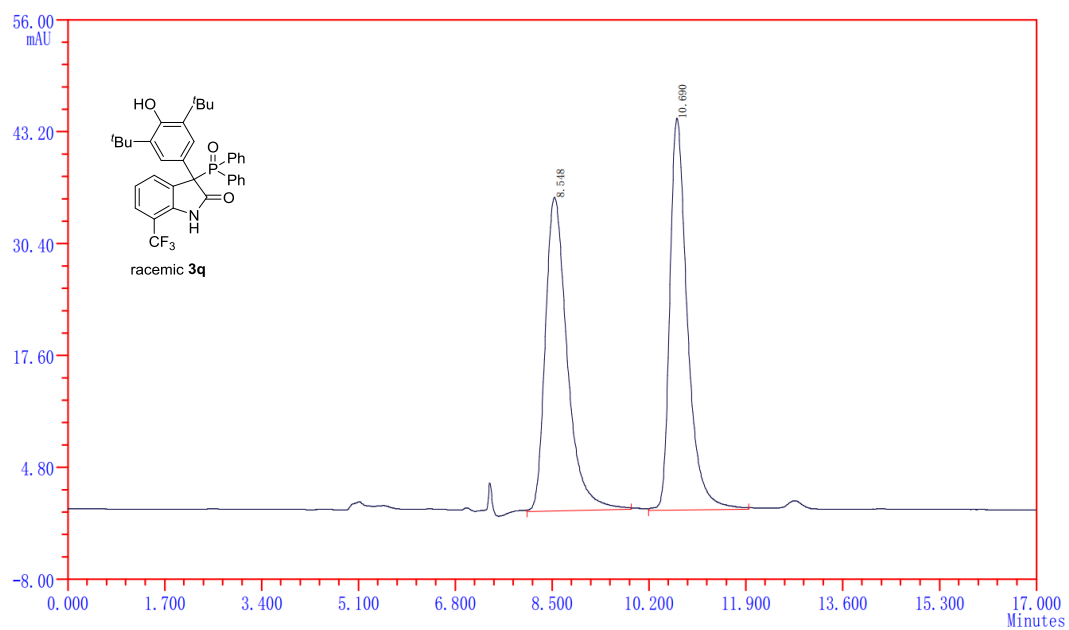

| Peak # | RetTime [Min] | Height [mAu] | Area [mAu*s] | Area %   |
|--------|---------------|--------------|--------------|----------|
| 1      | 8.548         | 35.87        | 962.215      | 49.951   |
| 2      | 10.690        | 44.85        | 964.113      | 50.049   |
| Total: |               | 80.72        | 1926.328     | 100.0000 |

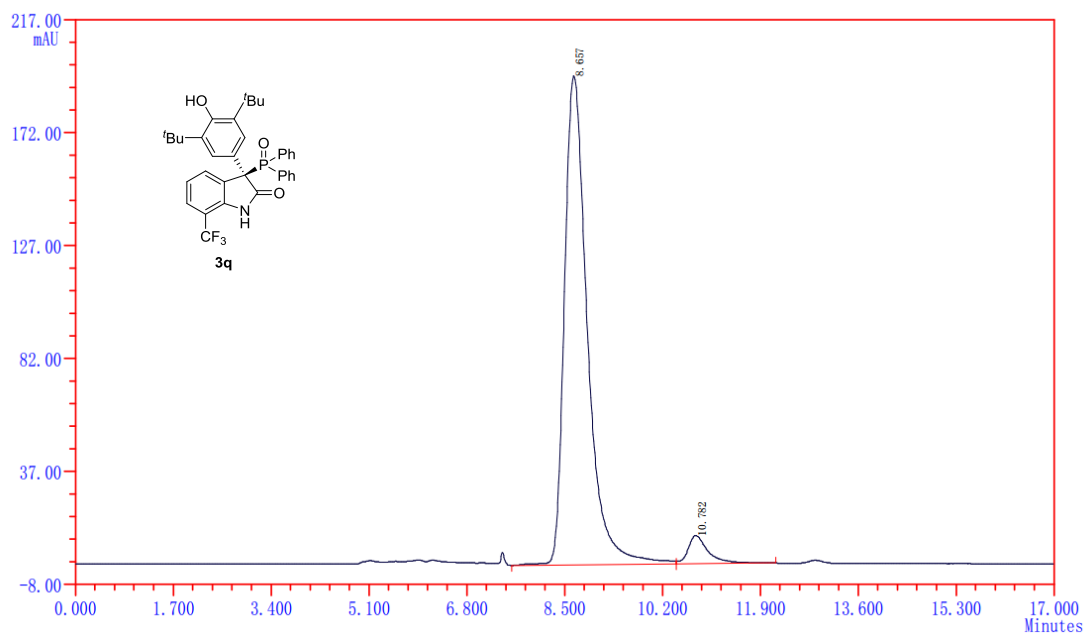

| Peak # | RetTime [Min] | Height [mAu] | Area [mAu*s] | Area %   |
|--------|---------------|--------------|--------------|----------|
| 1      | 8.657         | 194.80       | 5396.798     | 95.115   |
| 2      | 10.782        | 11.28        | 277.202      | 4.885    |
| Total: |               | 206.08       | 5674.000     | 100.0000 |

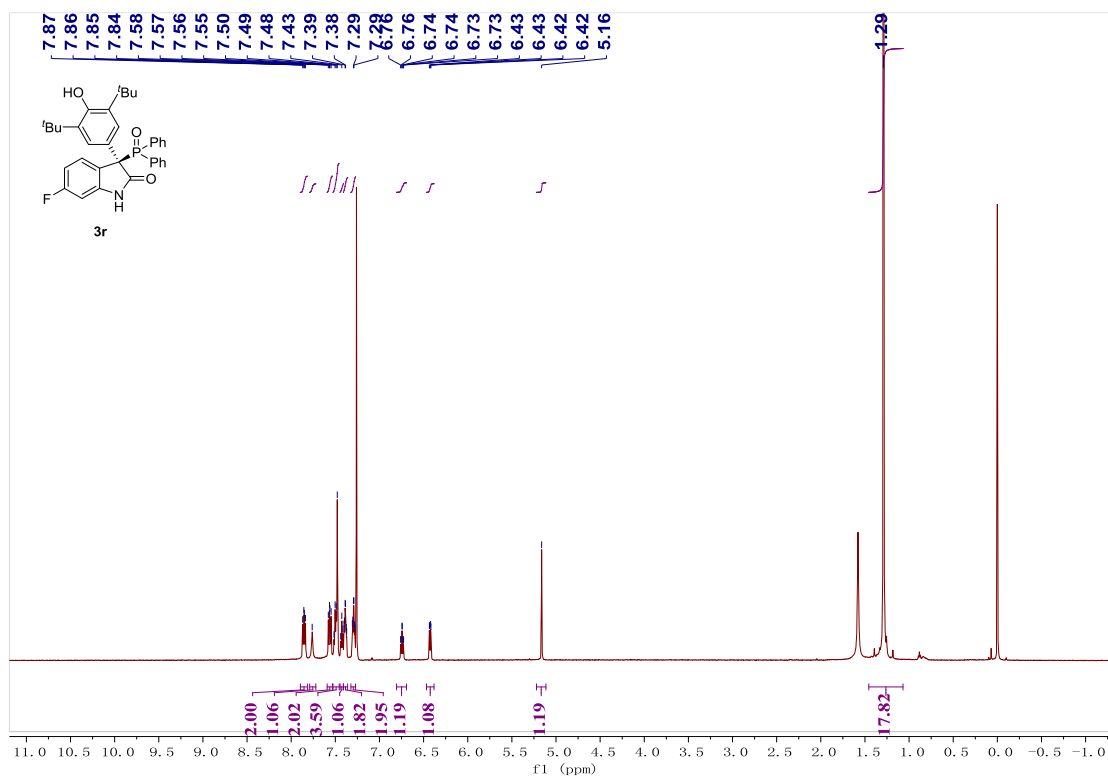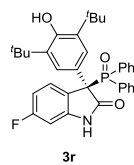

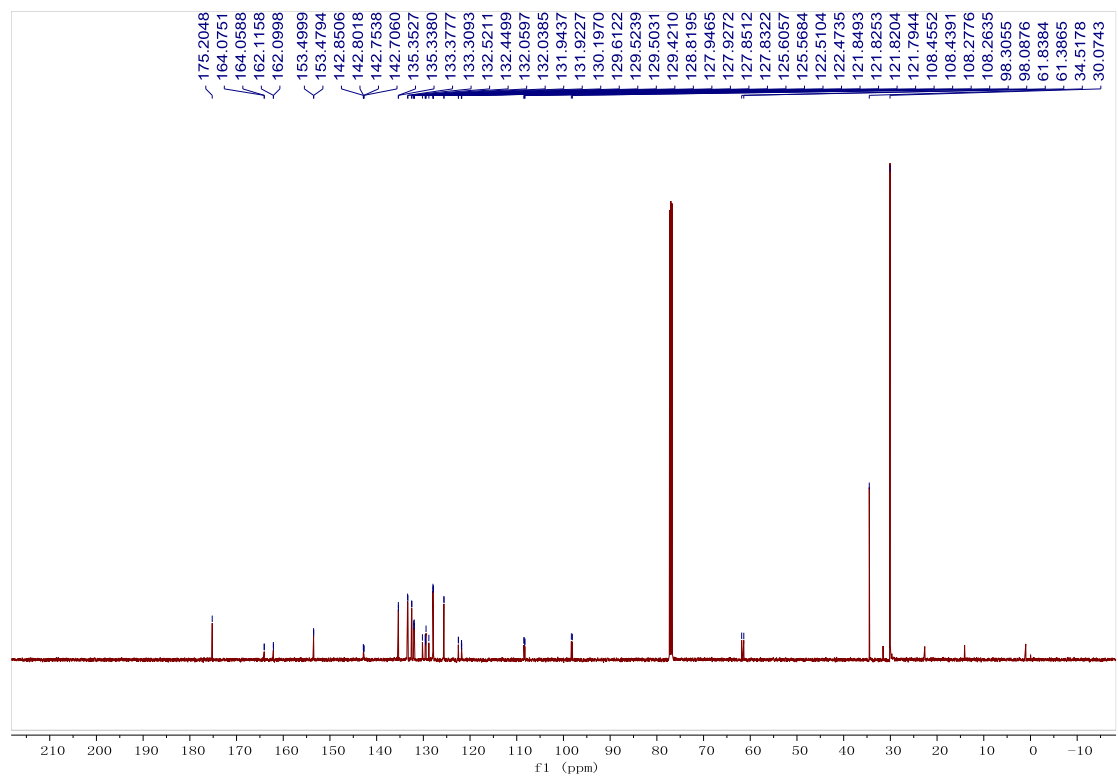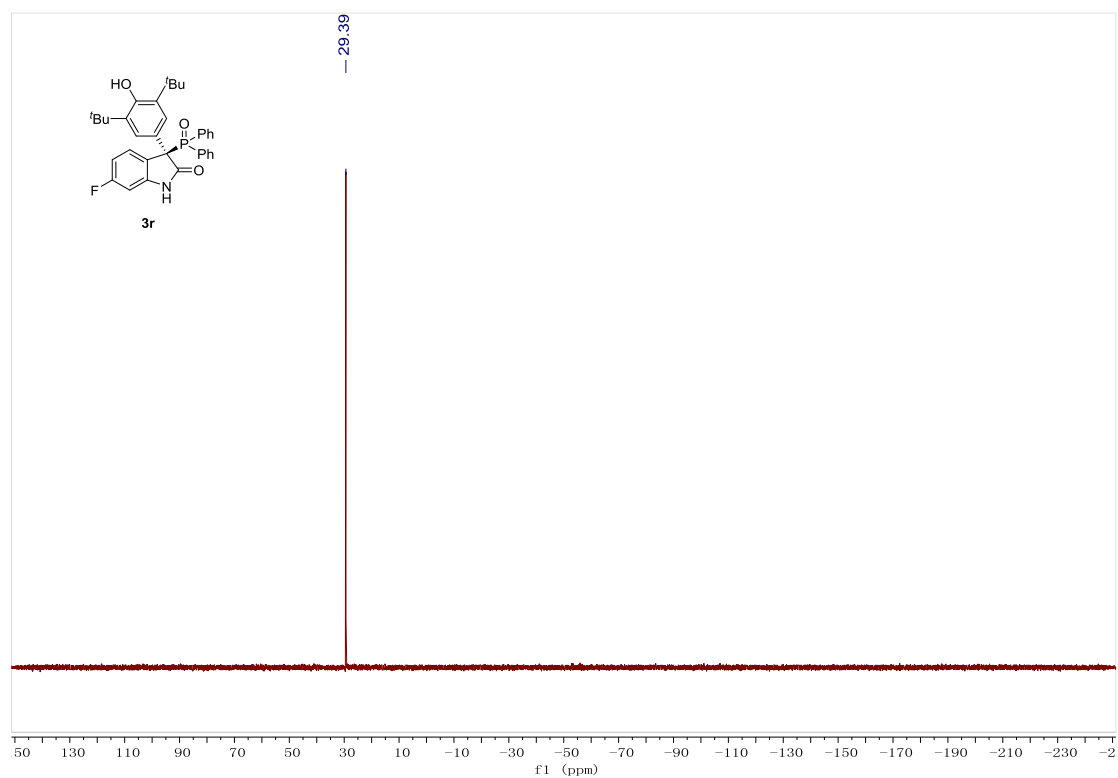

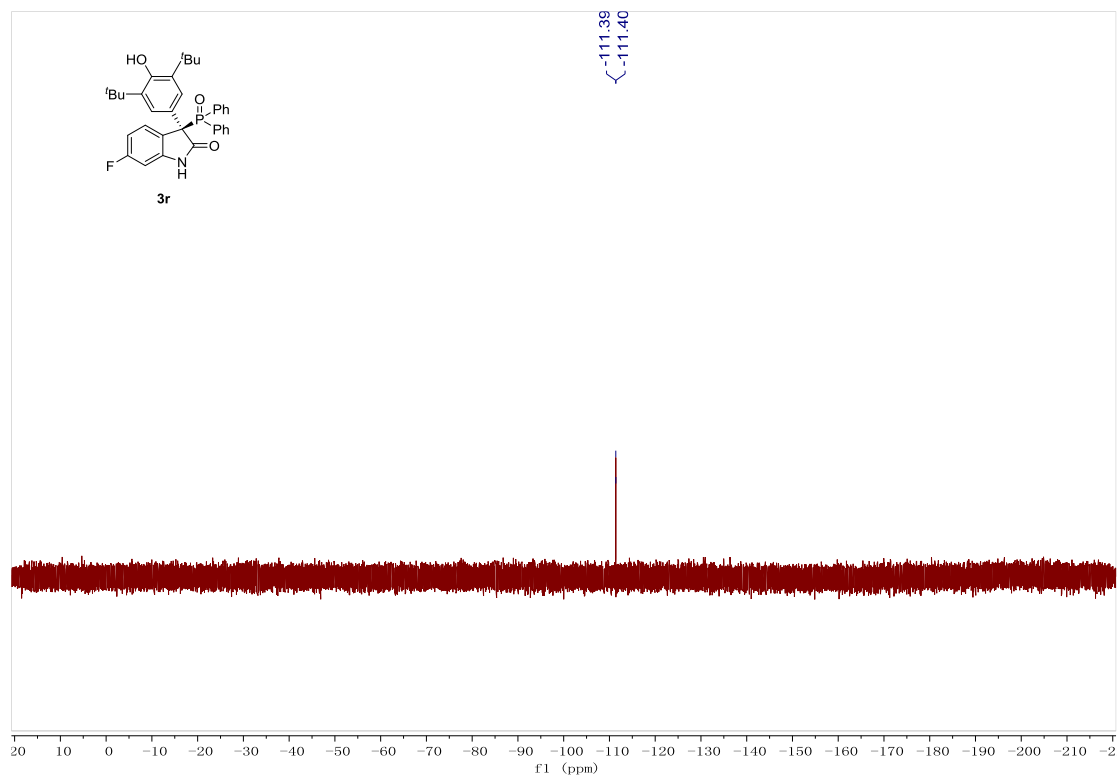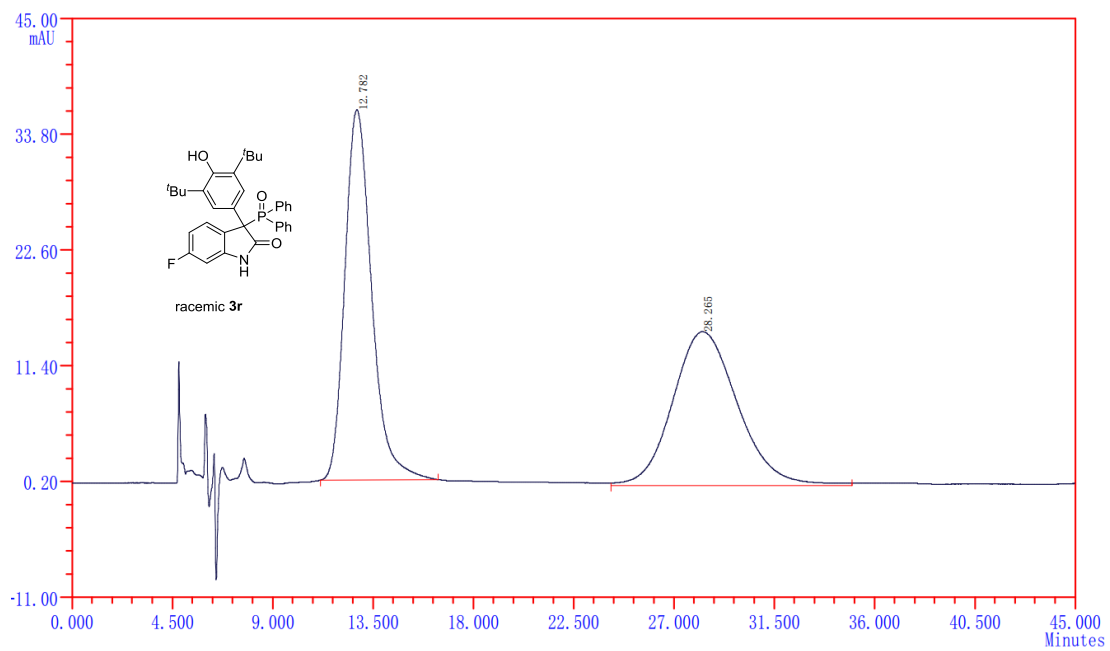

| Peak # | RetTime [Min] | Height [mAu] | Area [mAu*s] | Area %   |
|--------|---------------|--------------|--------------|----------|
| 1      | 12.782        | 35.82        | 2998.913     | 49.903   |
| 2      | 28.265        | 14.86        | 3010.517     | 50.097   |
| Total: |               | 50.68        | 6009.429     | 100.0000 |

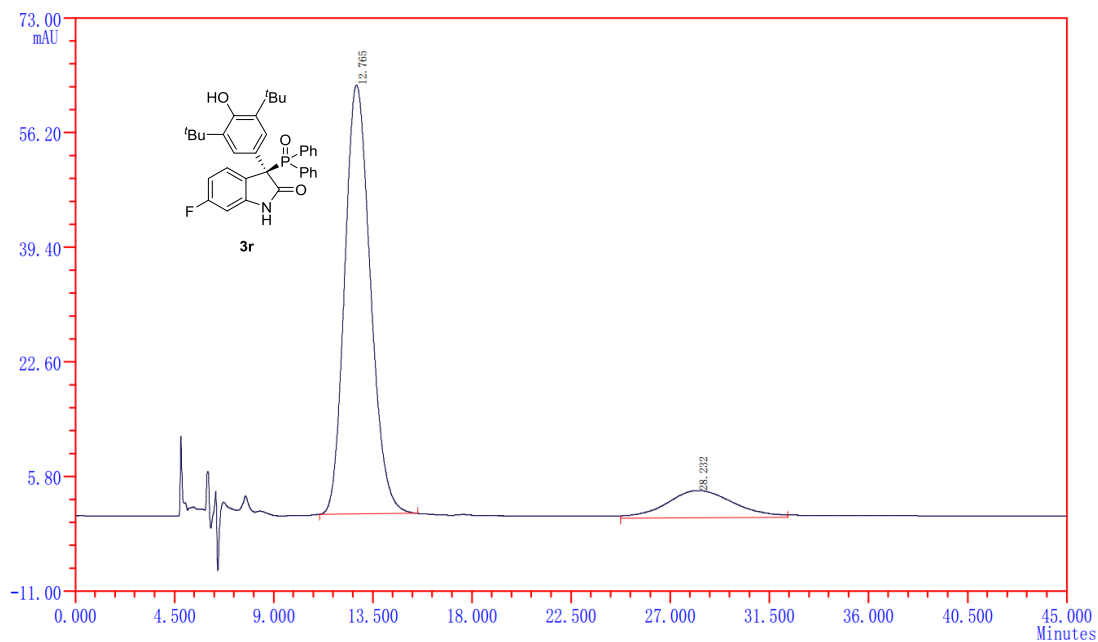

| Peak # | RetTime [Min] | Height [mAu] | Area [mAu*s] | Area %   |
|--------|---------------|--------------|--------------|----------|
| 1      | 12.765        | 62.90        | 5106.763     | 85.519   |
| 2      | 28.232        | 4.01         | 864.753      | 14.481   |
| Total: |               | 66.91        | 5971.517     | 100.0000 |

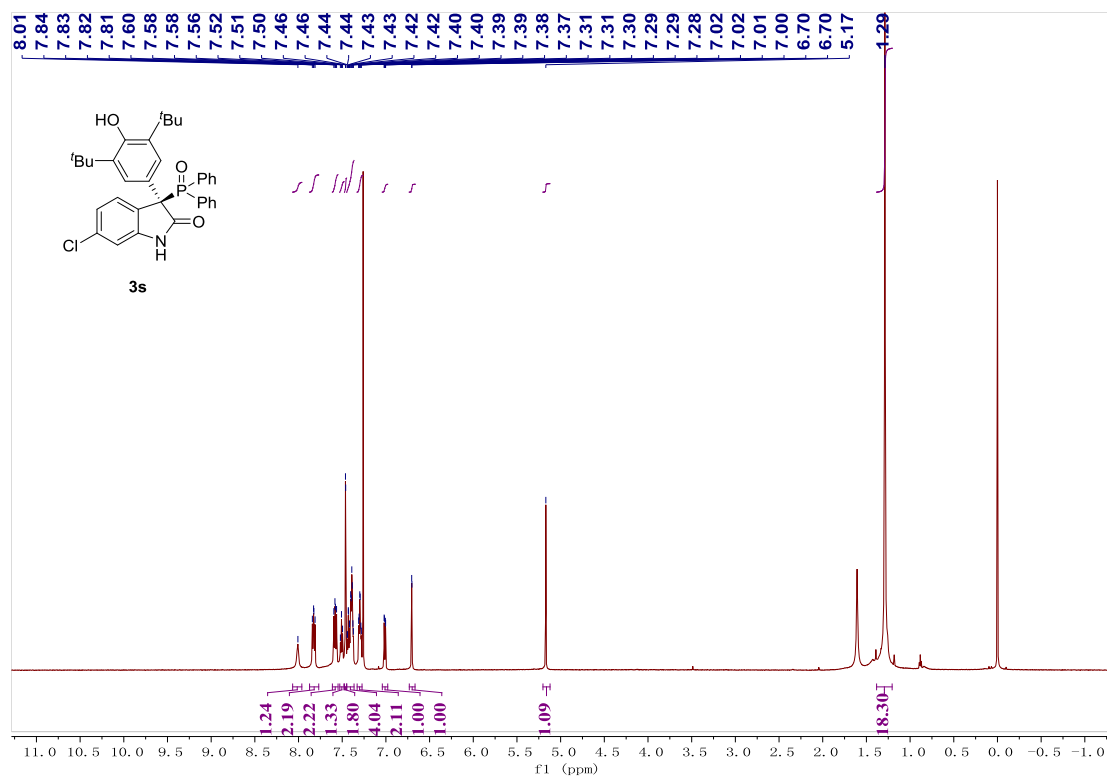

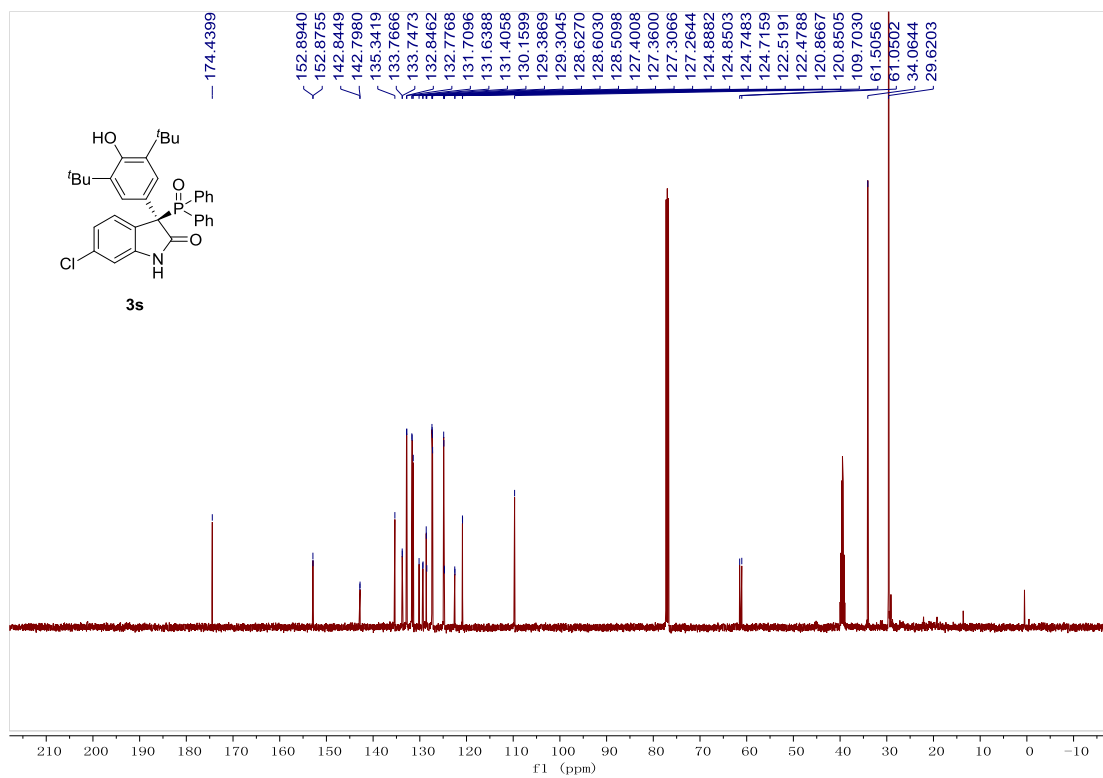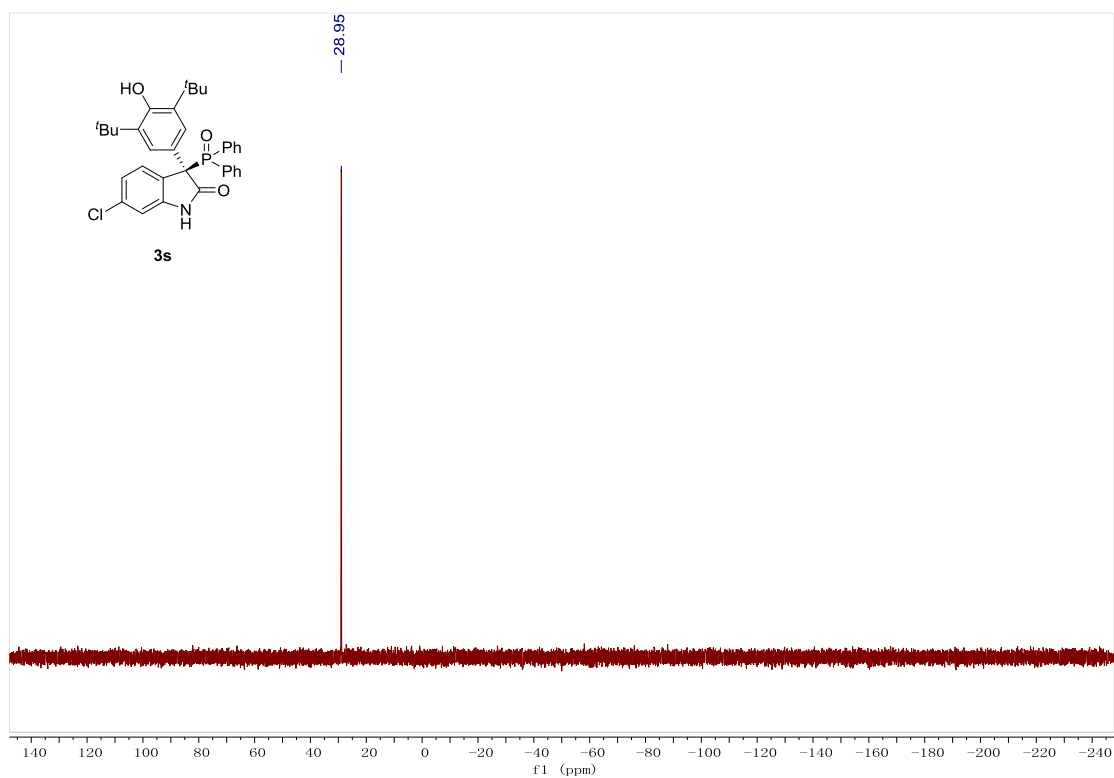

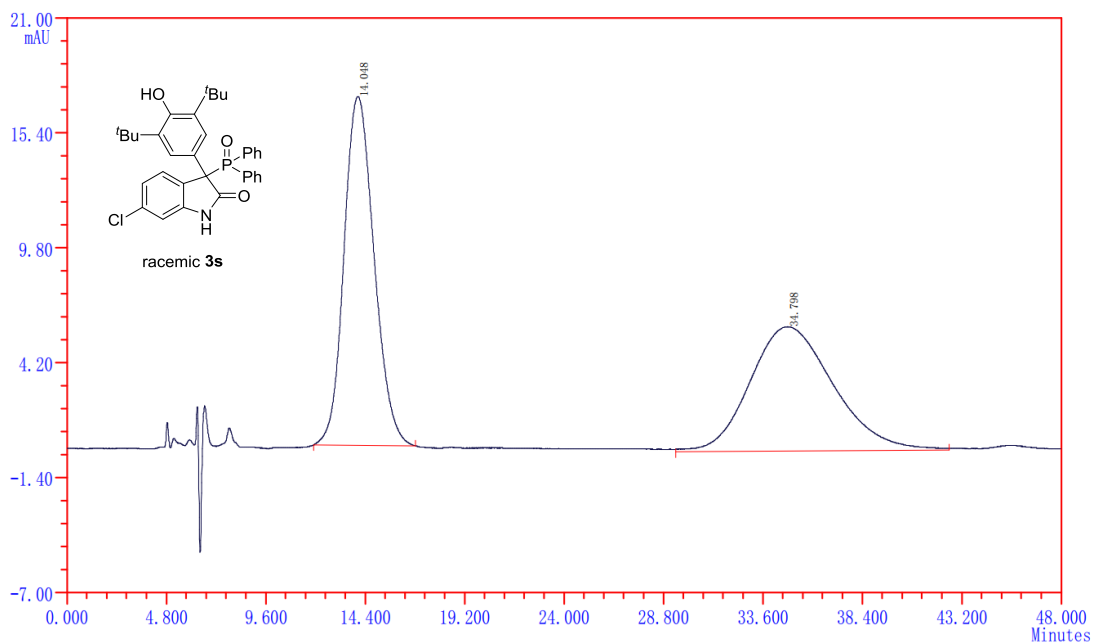

| Peak # | RetTime [Min] | Height [mAu] | Area [mAu*s] | Area %   |
|--------|---------------|--------------|--------------|----------|
| 1      | 14.048        | 17.00        | 1714.971     | 50.191   |
| 2      | 34.798        | 6.06         | 1701.918     | 49.809   |
| Total: |               | 23.06        | 3416.889     | 100.0000 |

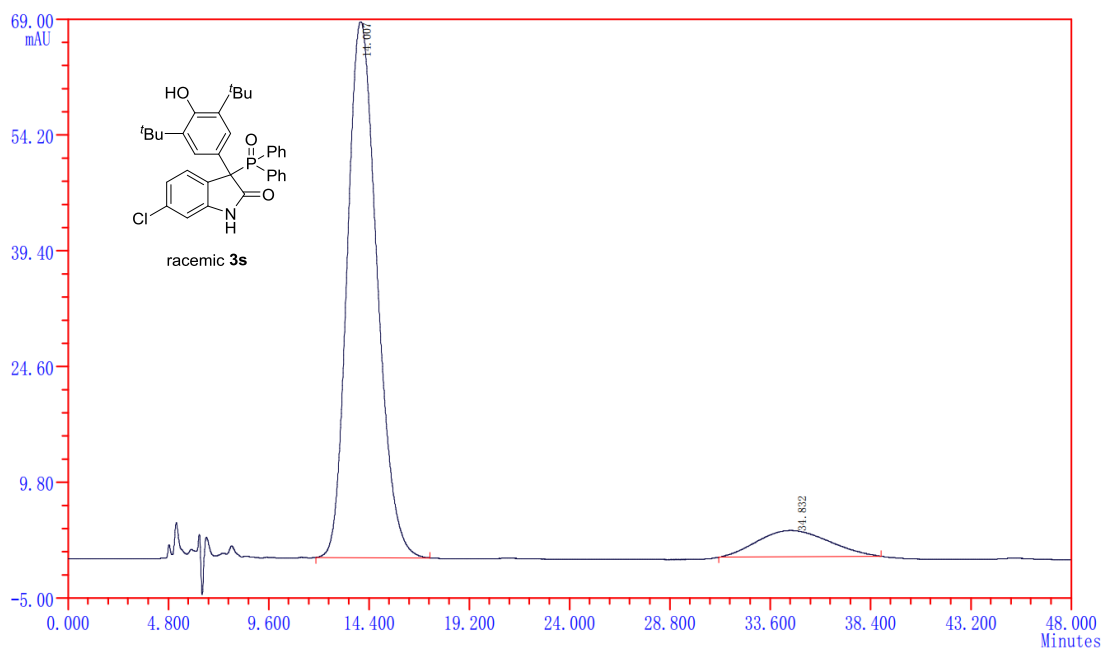

| Peak # | RetTime [Min] | Height [mAu] | Area [mAu*s] | Area %   |
|--------|---------------|--------------|--------------|----------|
| 1      | 14.007        | 68.59        | 6770.425     | 89.404   |
| 2      | 34.832        | 3.36         | 802.411      | 10.596   |
| Total: |               | 71.95        | 7572.836     | 100.0000 |



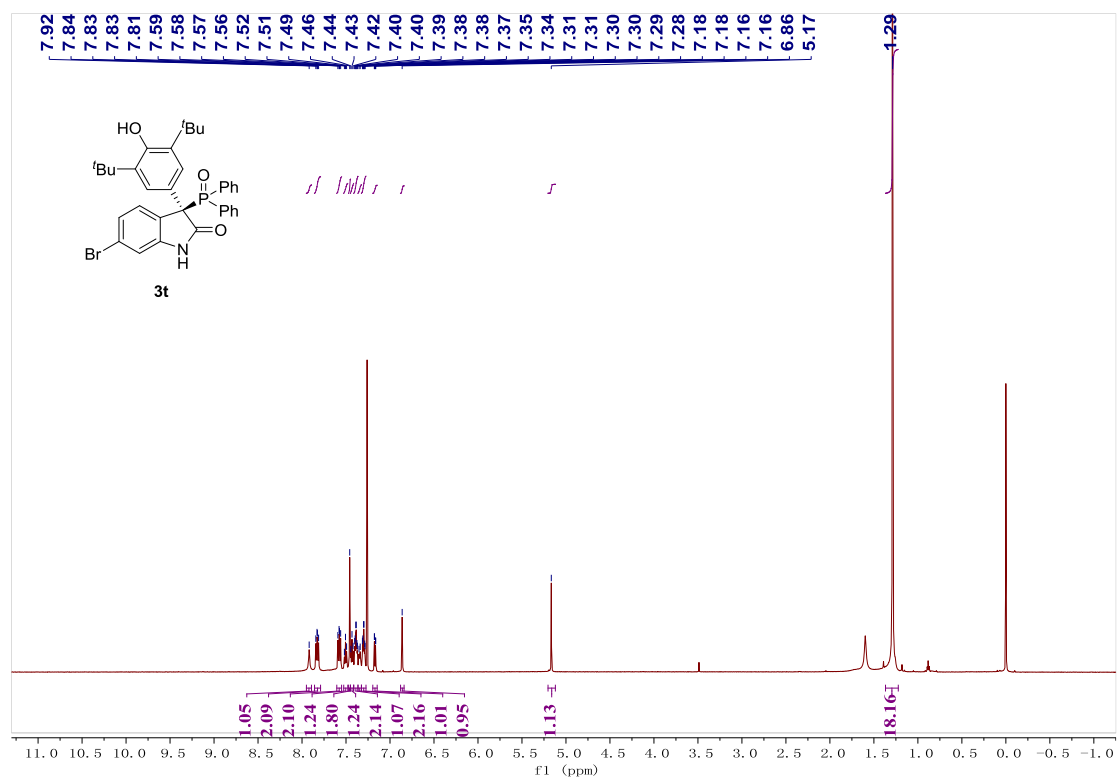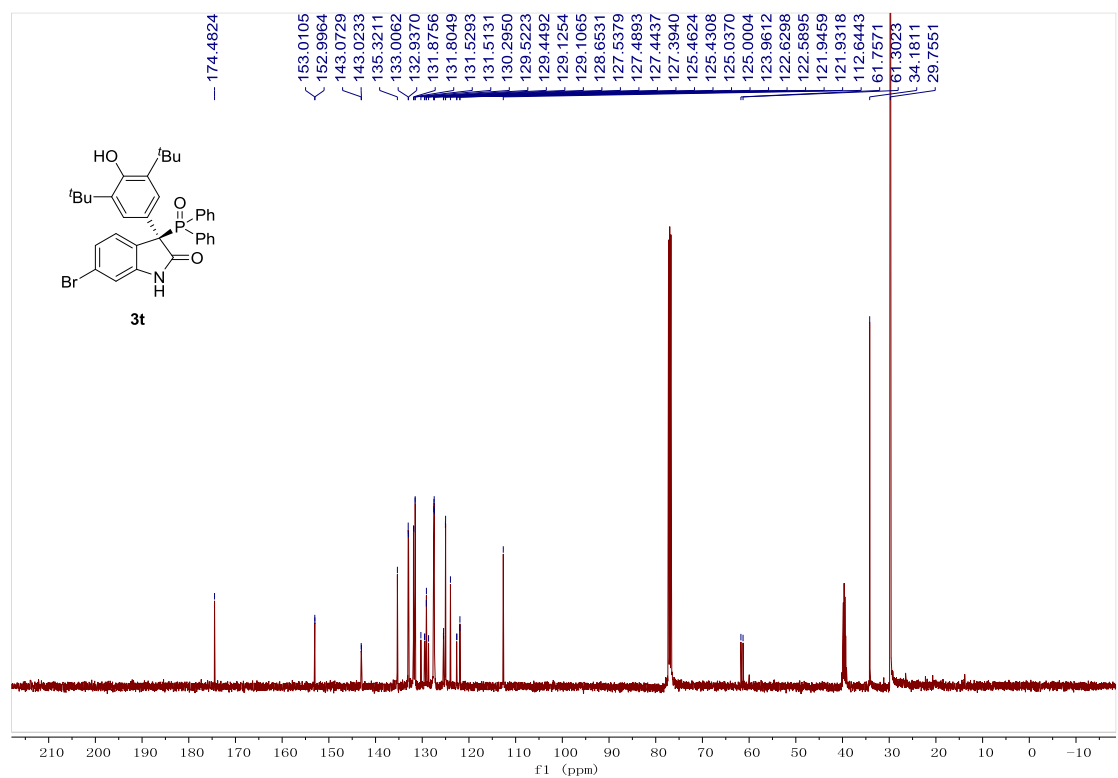

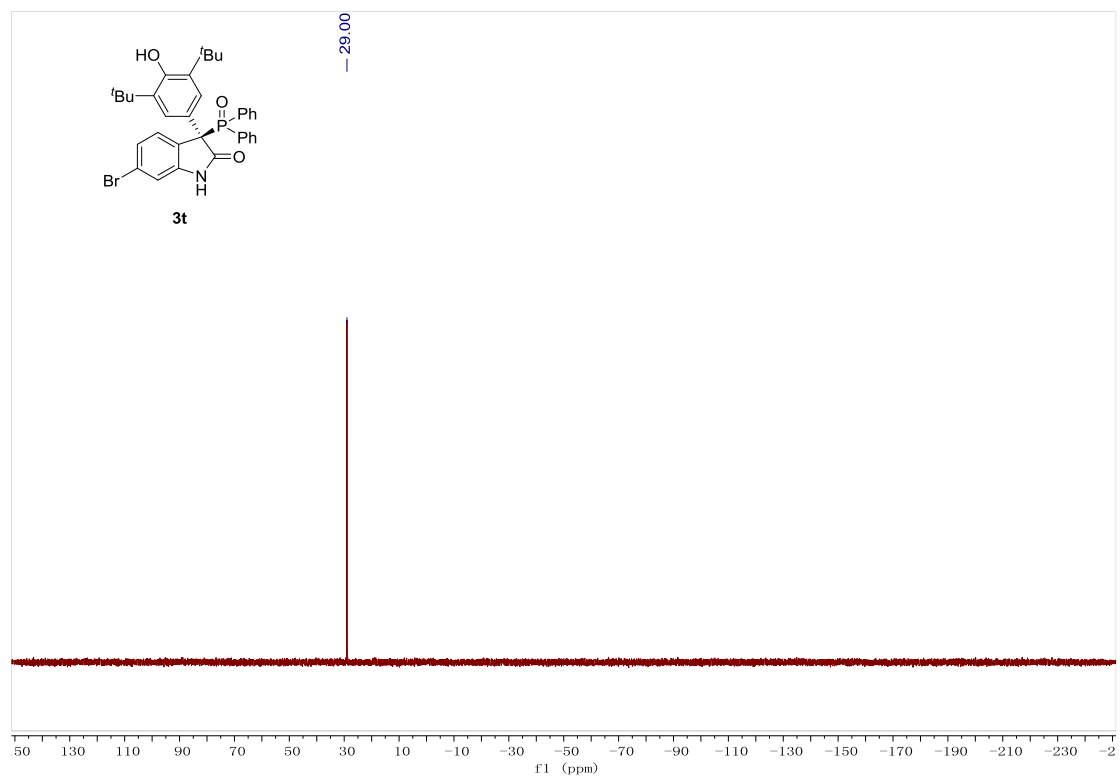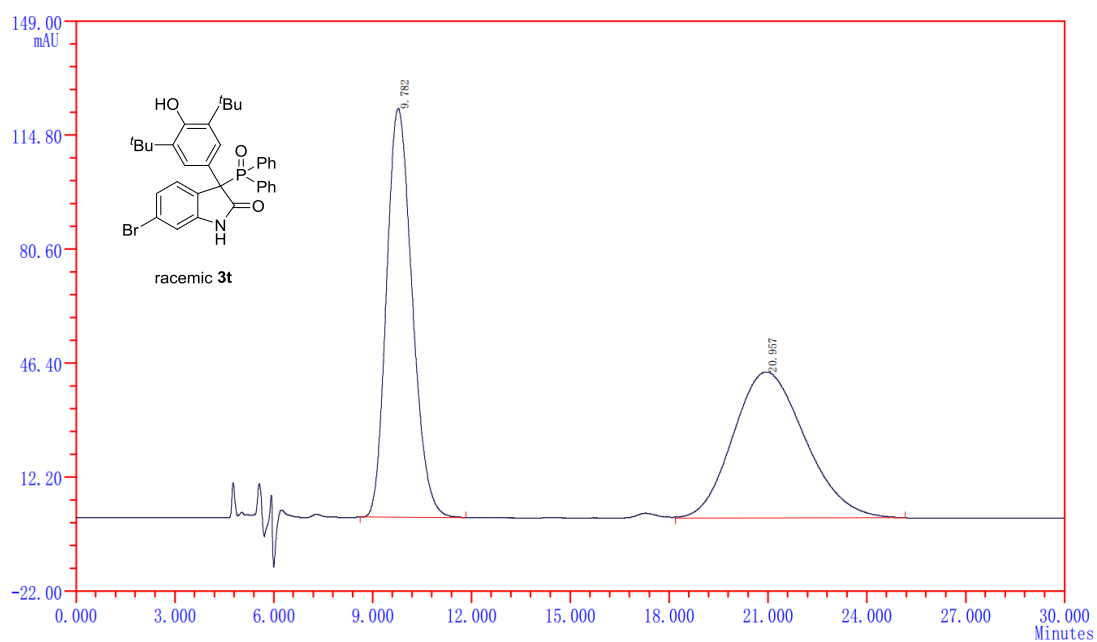

| Peak # | RetTime [Min] | Height [mAu] | Area [mAu*s] | Area %   |
|--------|---------------|--------------|--------------|----------|
| 1      | 9.782         | 122.63       | 6652.943     | 50.050   |
| 2      | 20.957        | 43.75        | 6639.538     | 49.950   |
| Total: |               | 166.38       | 13292.481    | 100.0000 |

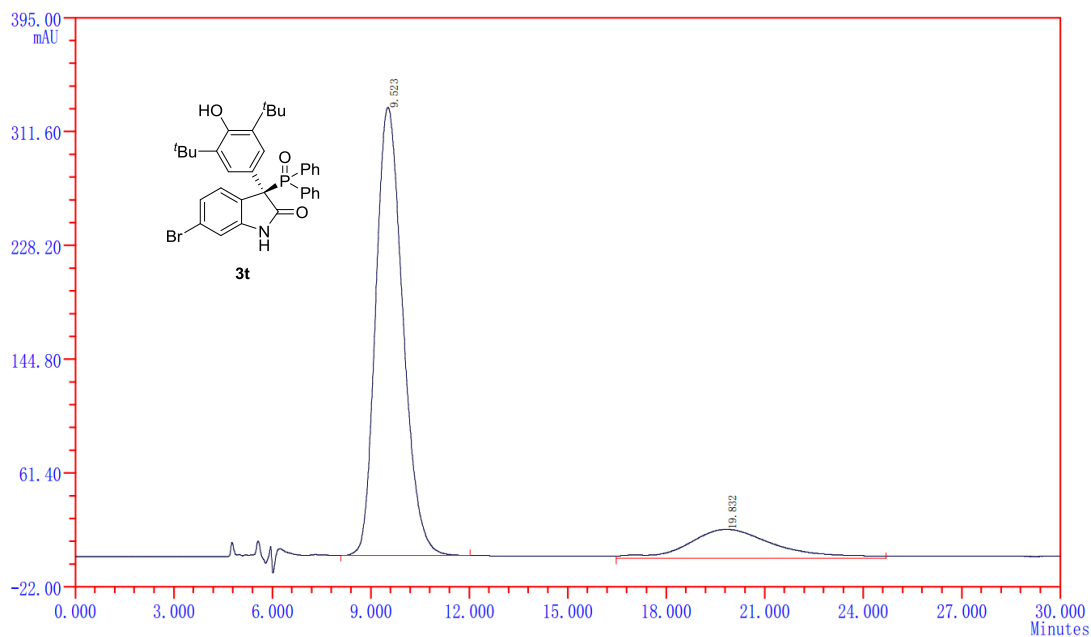

| Peak # | RetTime [Min] | Height [mAu] | Area [mAu*s] | Area %   |
|--------|---------------|--------------|--------------|----------|
| 1      | 9.523         | 328.39       | 18883.414    | 82.544   |
| 2      | 19.832        | 21.28        | 3993.449     | 17.456   |
| Total: |               | 349.67       | 22876.863    | 100.0000 |

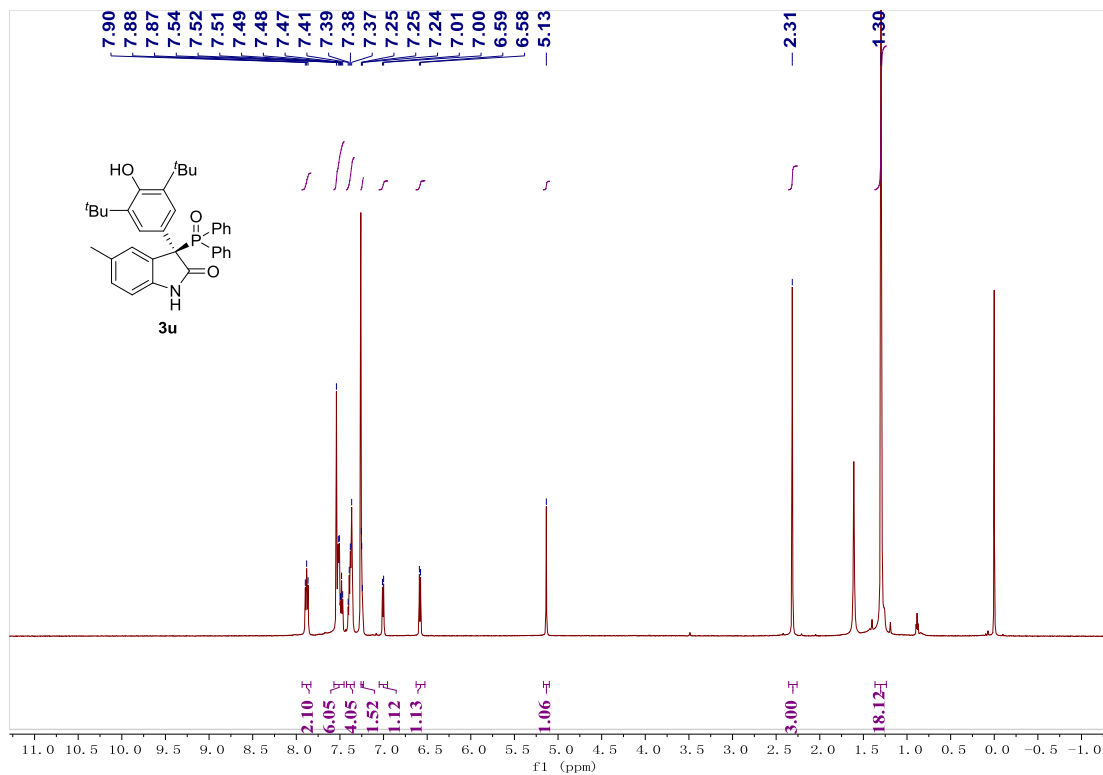

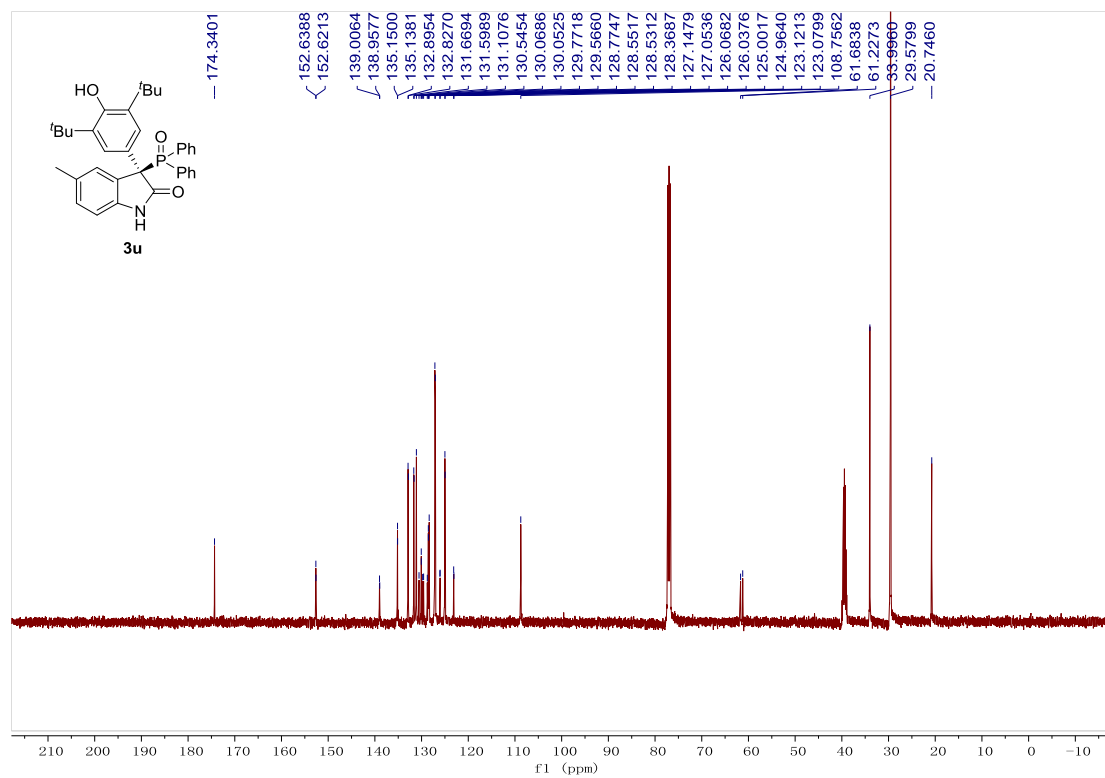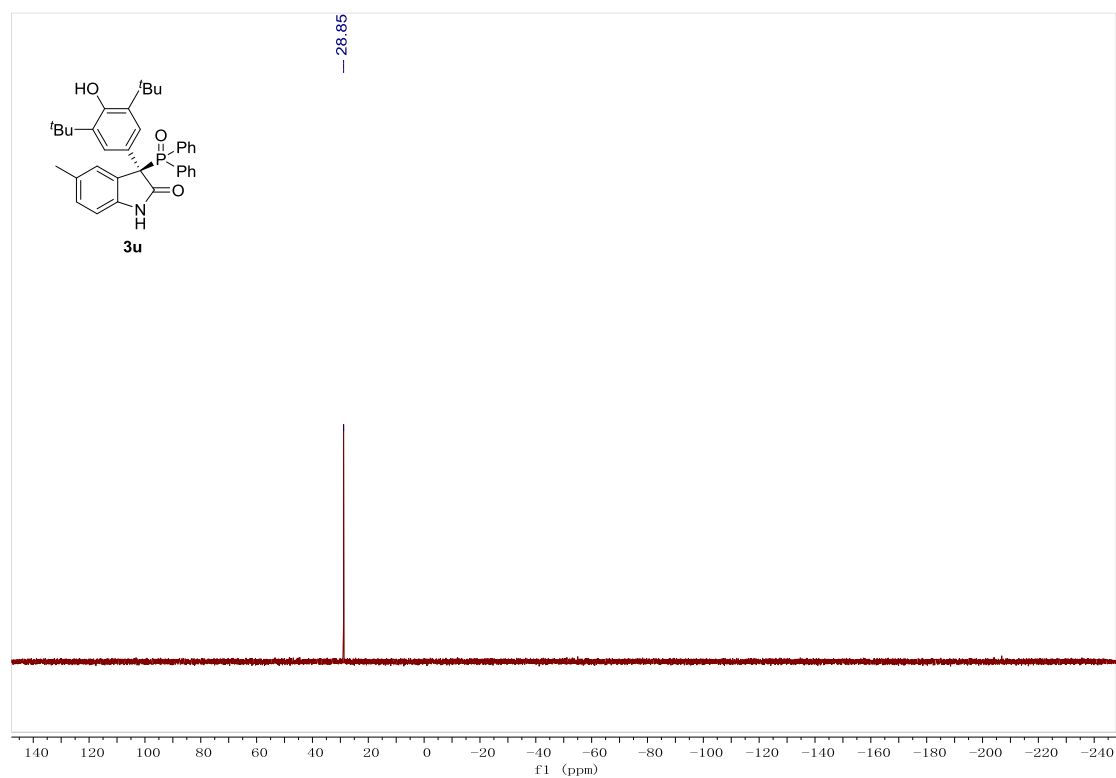

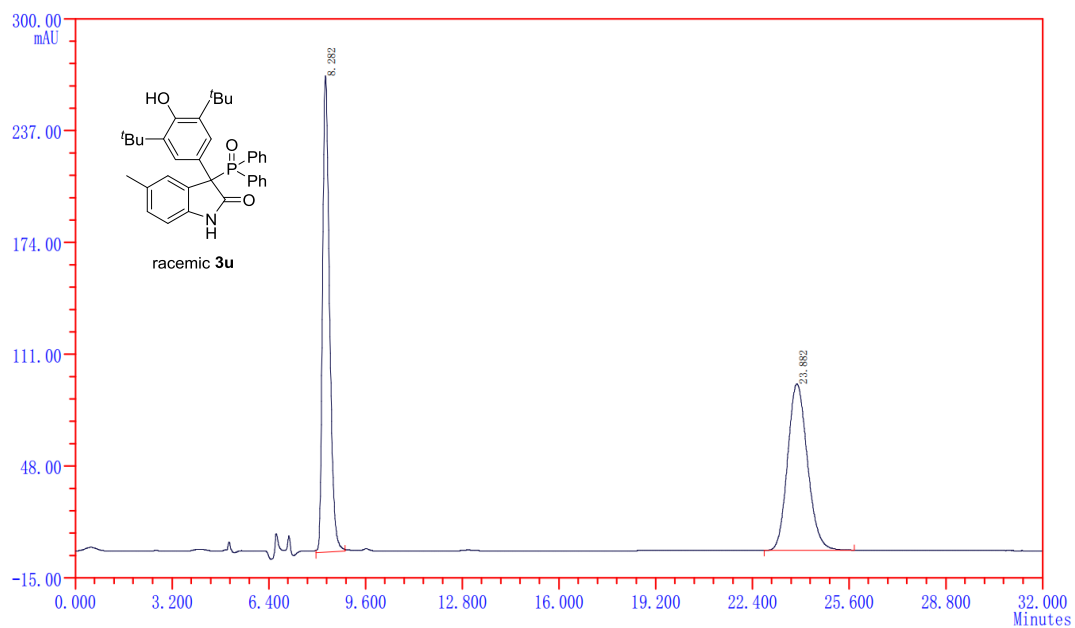

| Peak # | RetTime [Min] | Height [mAu] | Area [mAu*s] | Area %   |
|--------|---------------|--------------|--------------|----------|
| 1      | 8.282         | 268.21       | 4320.289     | 50.176   |
| 2      | 23.882        | 93.87        | 4289.950     | 49.824   |
| Total: |               | 362.08       | 8610.238     | 100.0000 |

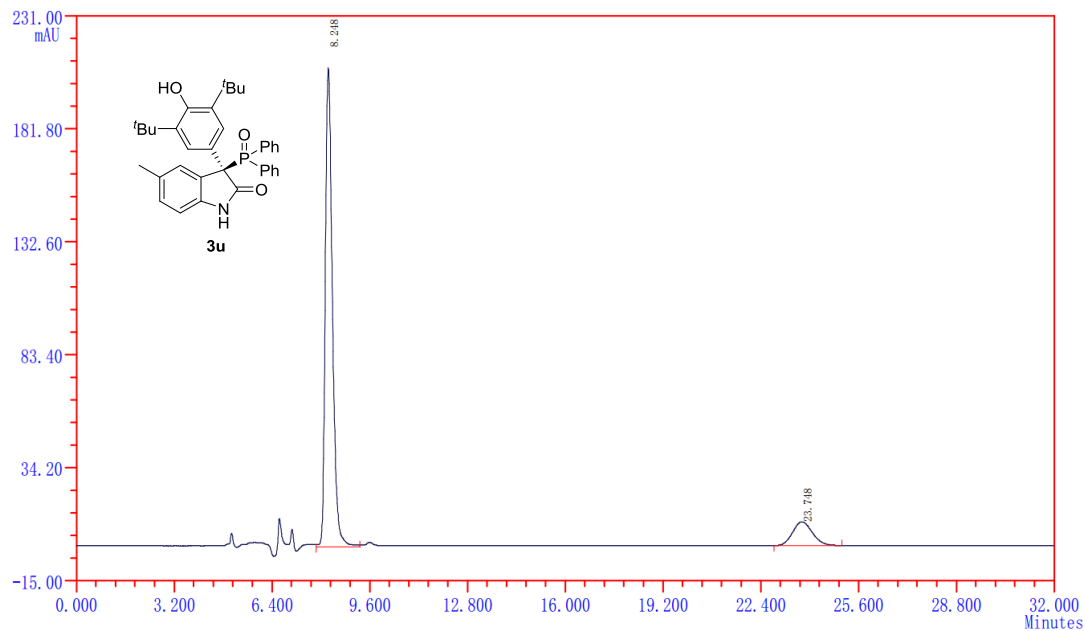

| Peak # | RetTime [Min] | Height [mAu] | Area [mAu*s] | Area %   |
|--------|---------------|--------------|--------------|----------|
| 1      | 8.248         | 208.50       | 3371.057     | 87.761   |
| 2      | 23.748        | 10.40        | 470.105      | 12.239   |
| Total: |               | 362.08       | 3841.162     | 100.0000 |

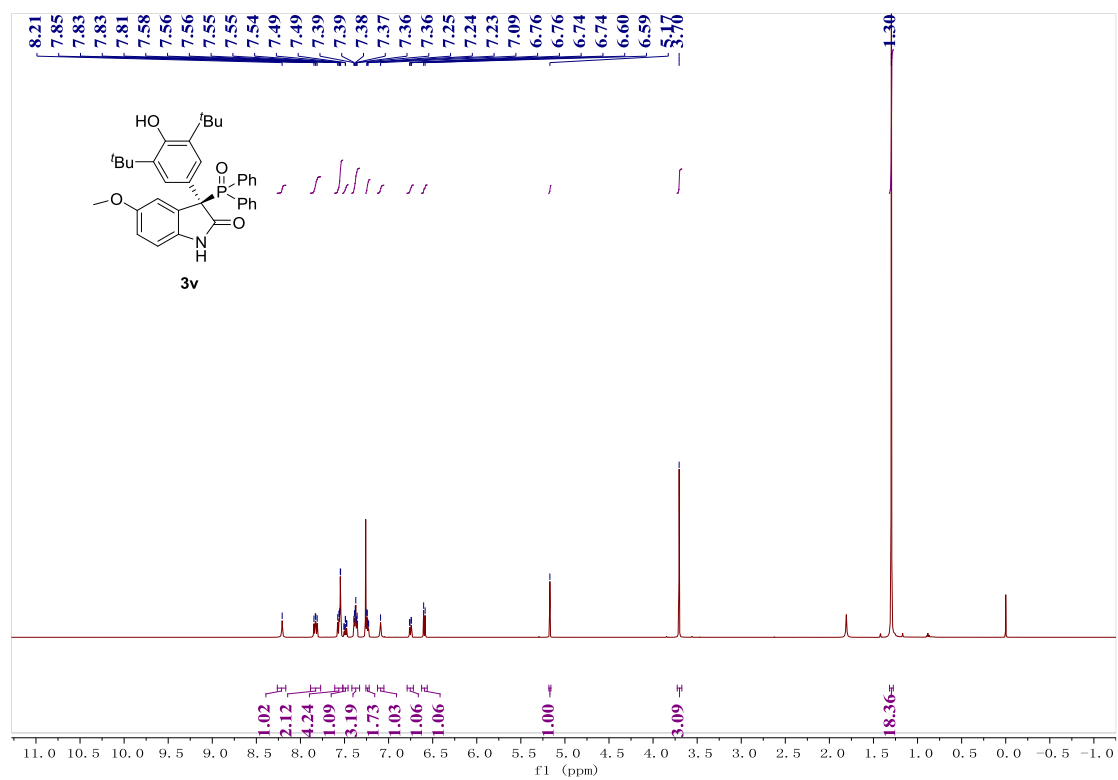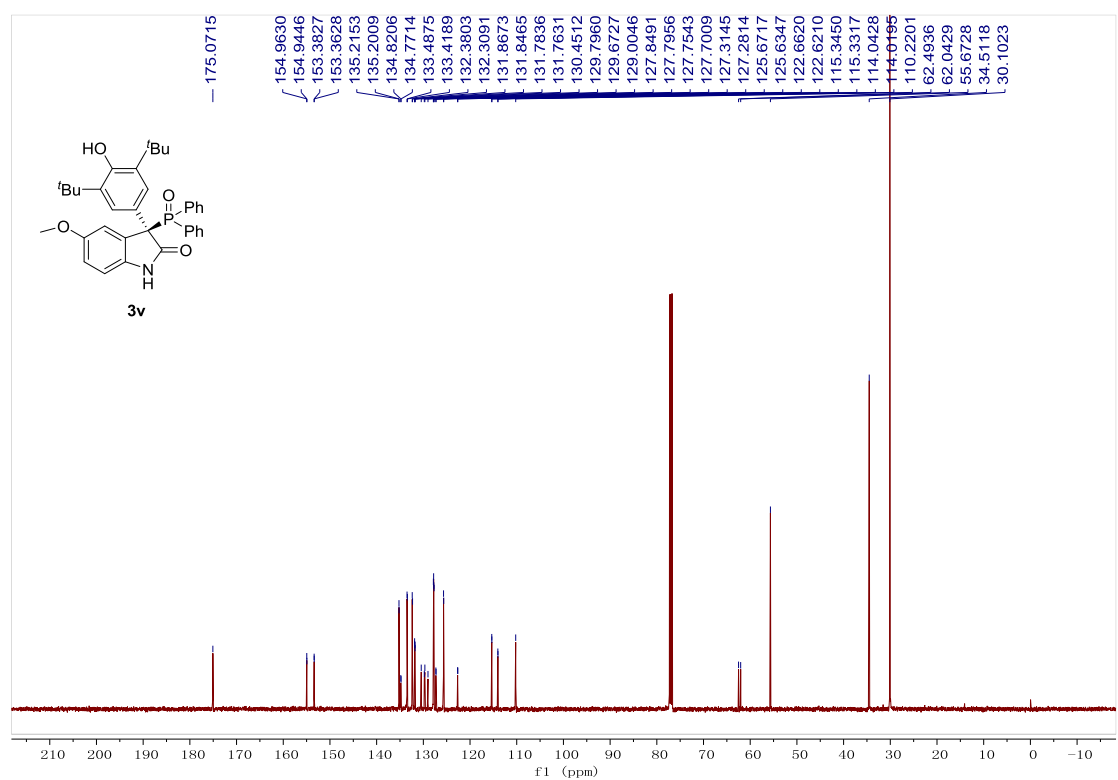

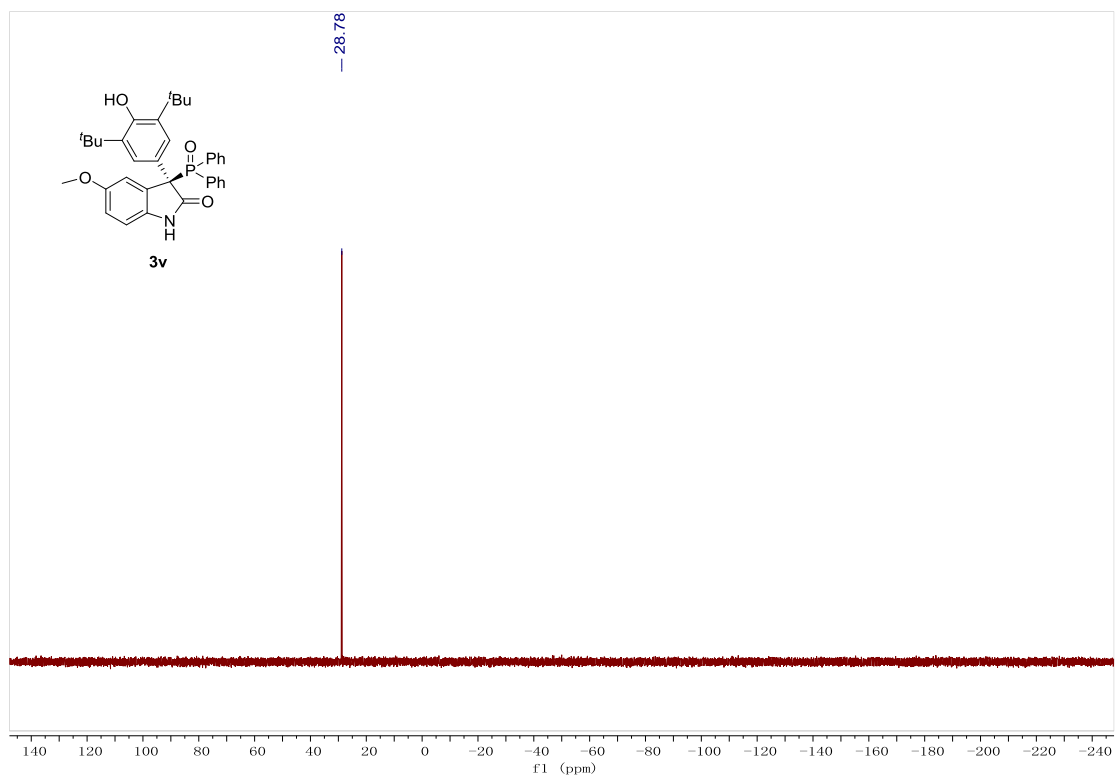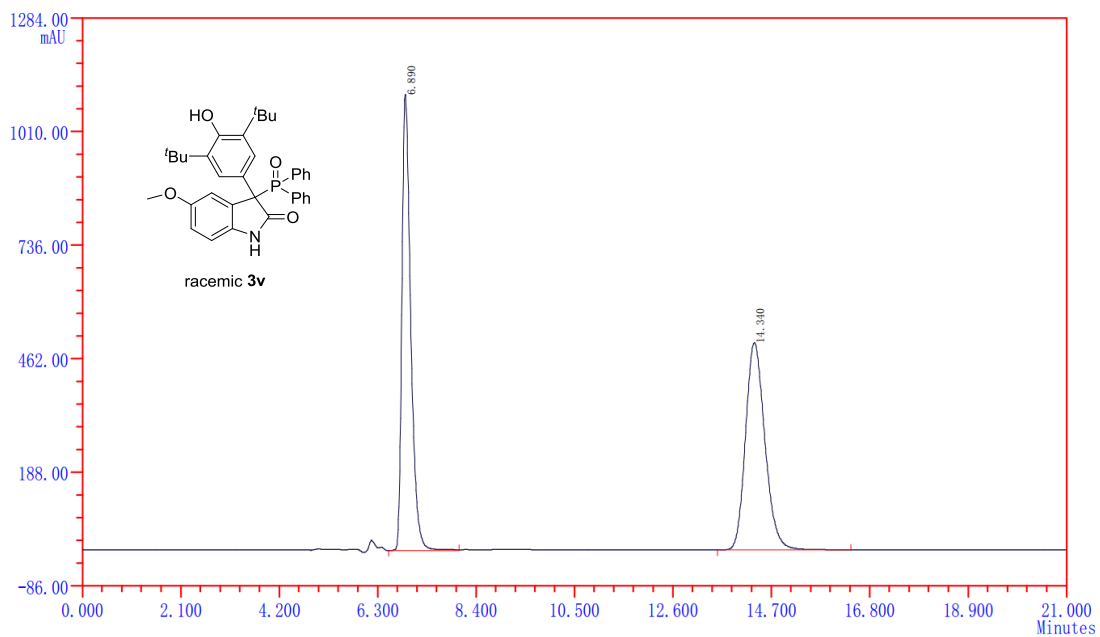

| Peak # | RetTime [Min] | Height [mAu] | Area [mAu*s] | Area %   |
|--------|---------------|--------------|--------------|----------|
| 1      | 6.890         | 1100.23      | 14471.599    | 50.144   |
| 2      | 14.340        | 499.59       | 14388.358    | 49.856   |
| Total: |               | 1599.82      | 28859.957    | 100.0000 |

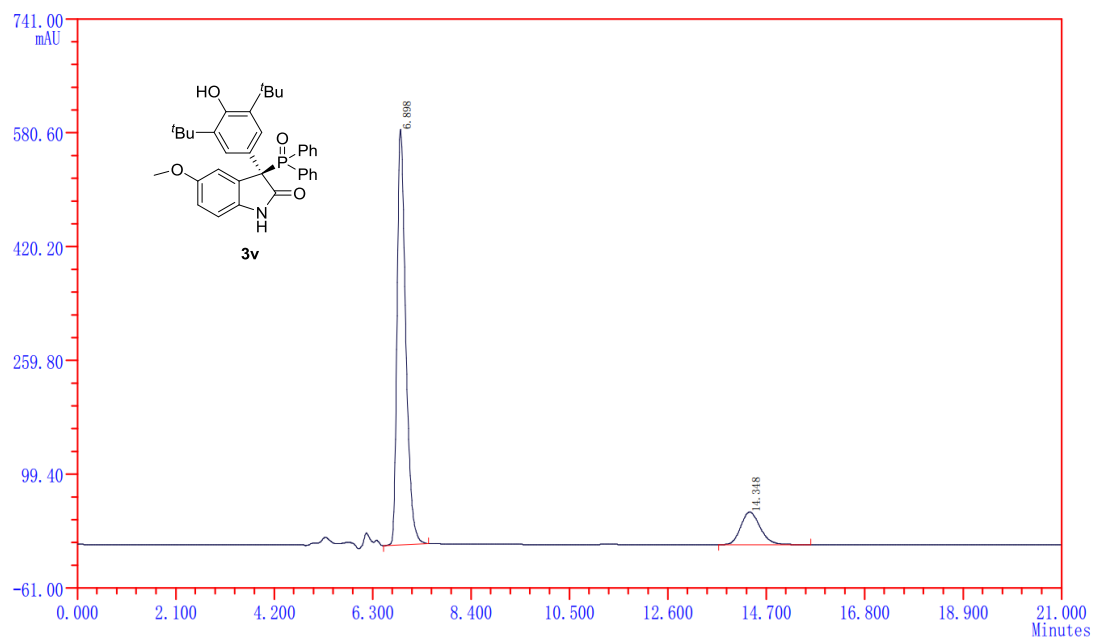

| Peak # | RetTime [Min] | Height [mAu] | Area [mAu*s] | Area %   |
|--------|---------------|--------------|--------------|----------|
| 1      | 6.898         | 586.25       | 7572.108     | 85.116   |
| 2      | 14.348        | 46.01        | 1324.138     | 14.884   |
| Total: |               | 632.26       | 8896.246     | 100.0000 |

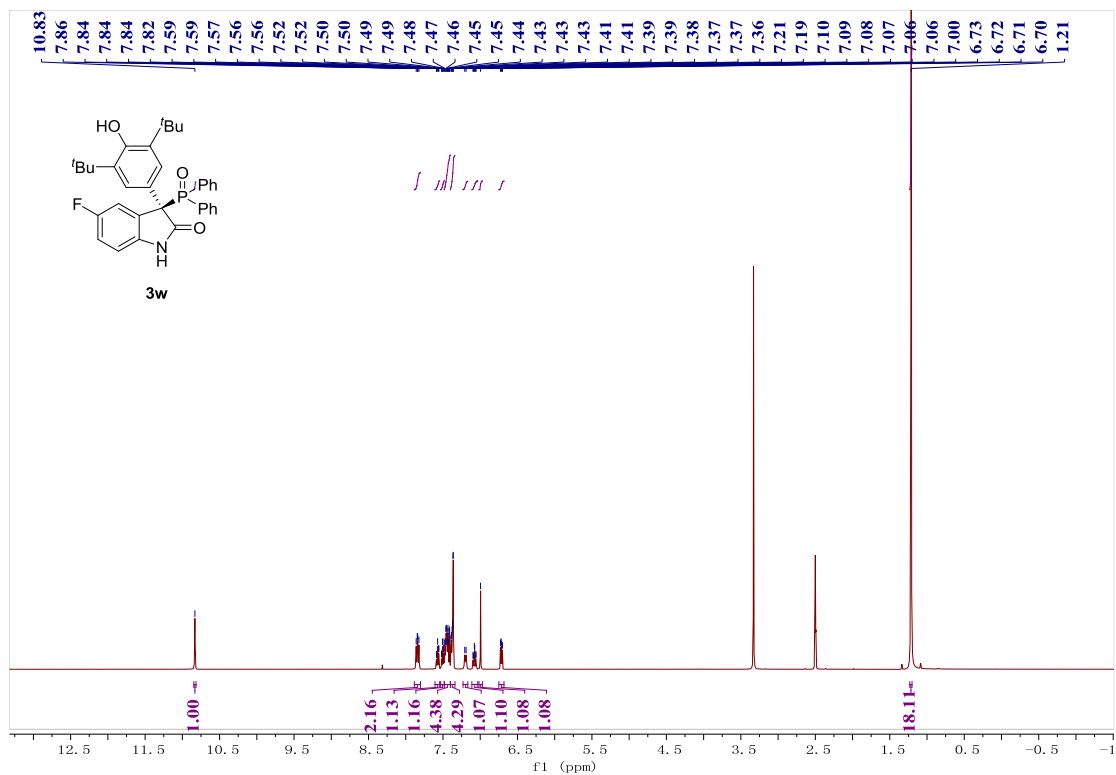



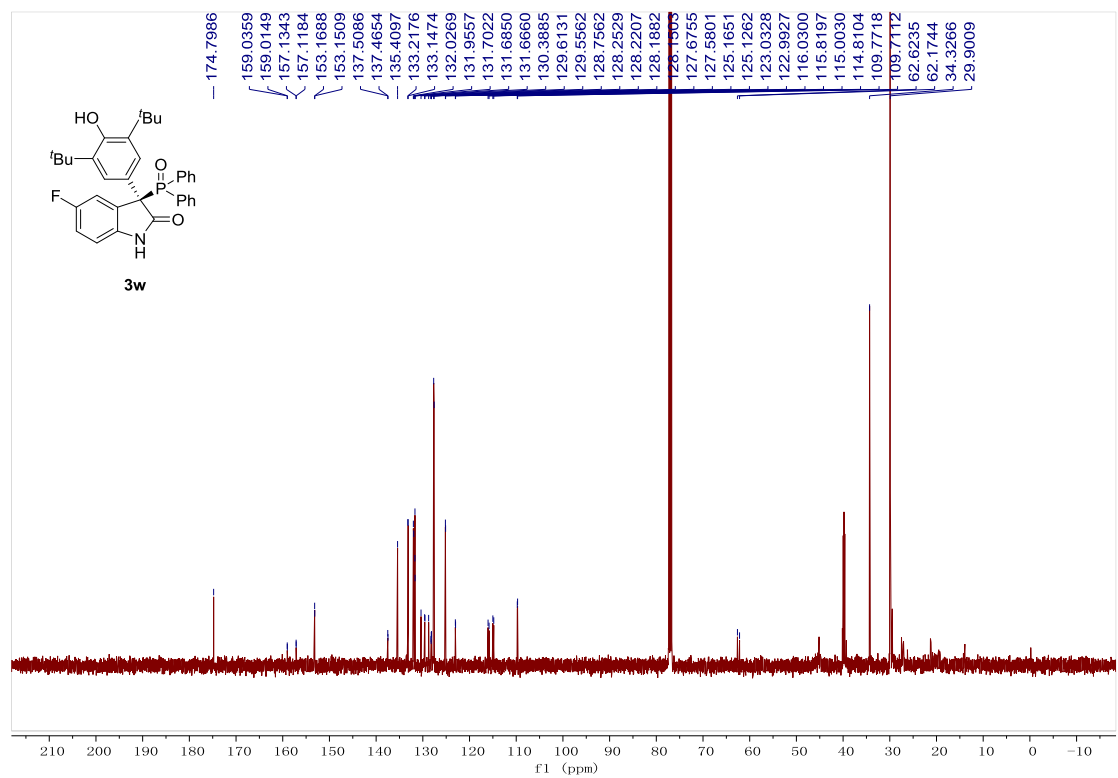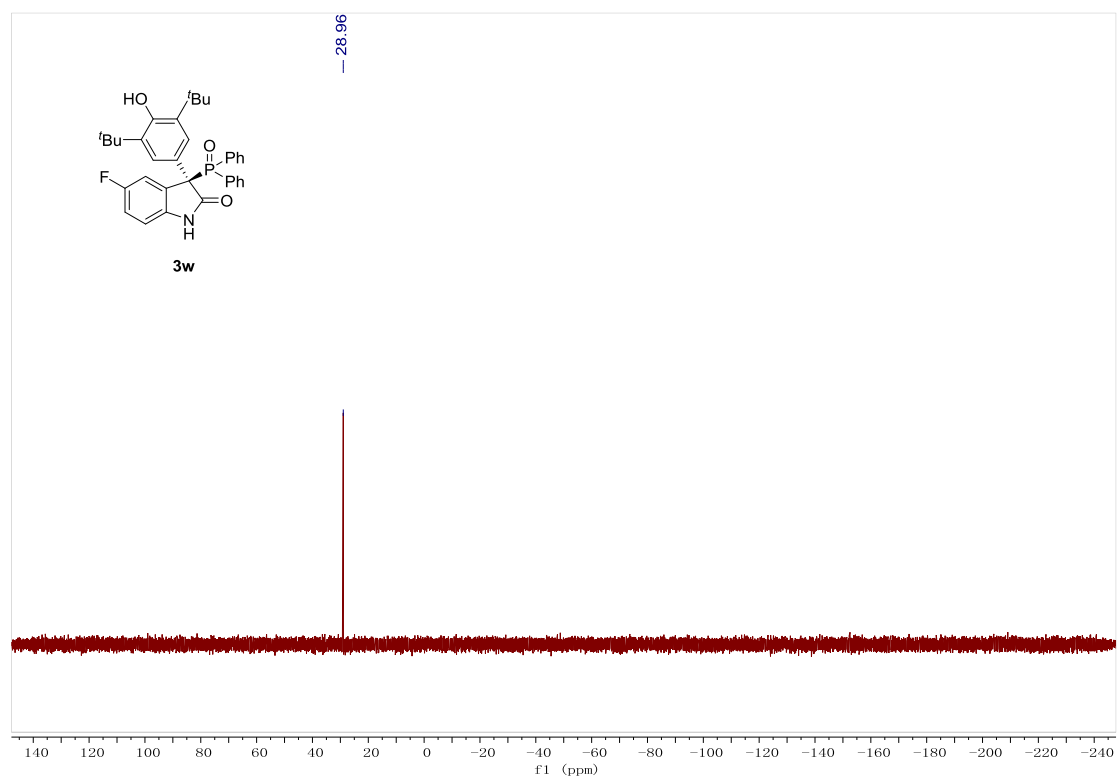

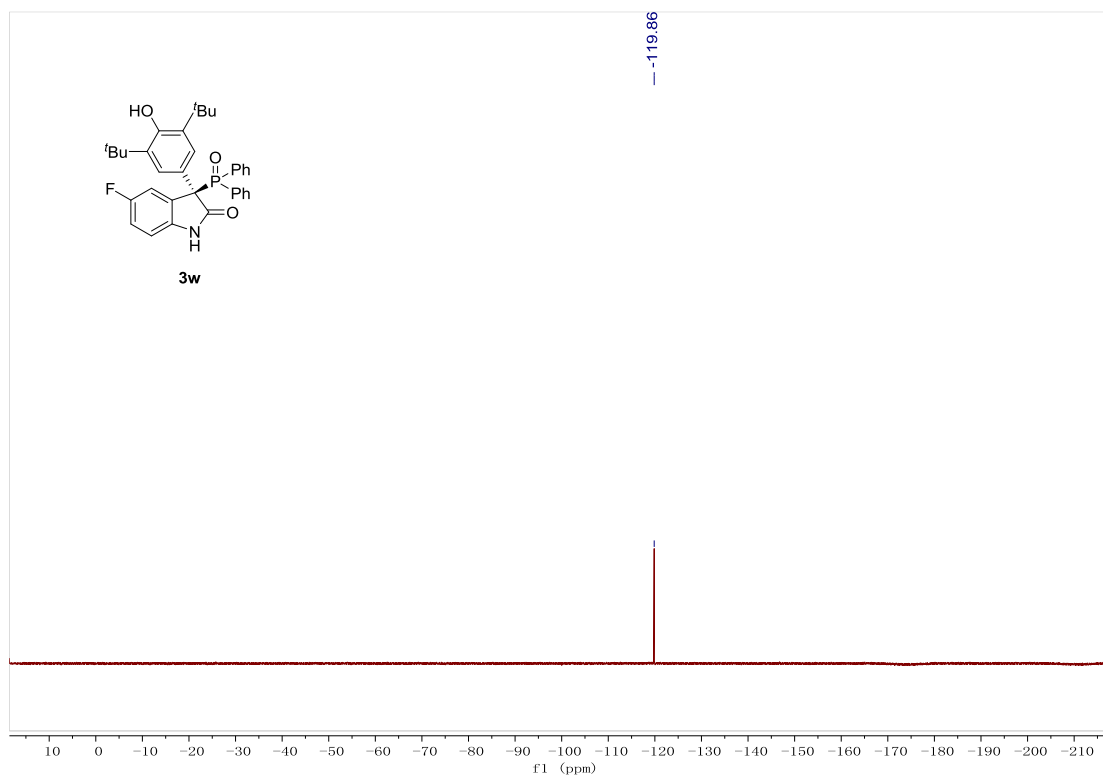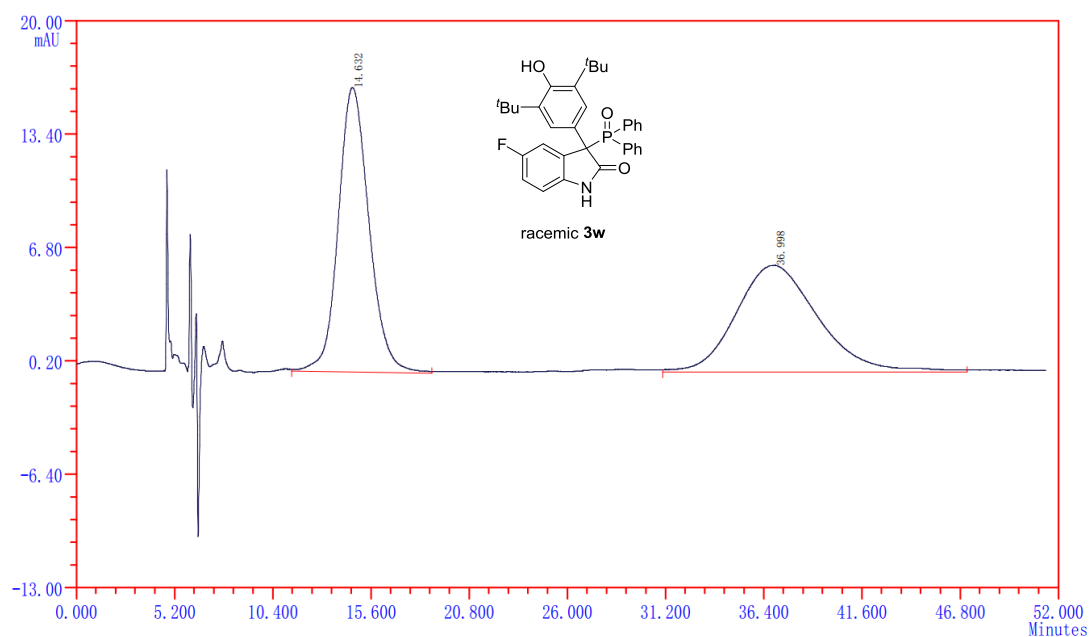

| Peak #        | RetTime [Min] | Height [mAu] | Area [mAu*s] | Area %   |
|---------------|---------------|--------------|--------------|----------|
| 1             | 14.632        | 16.55        | 1871.109     | 49.939   |
| 2             | 36.998        | 6.21         | 1875.664     | 50.061   |
| <b>Total:</b> |               | 22.76        | 3746.772     | 100.0000 |

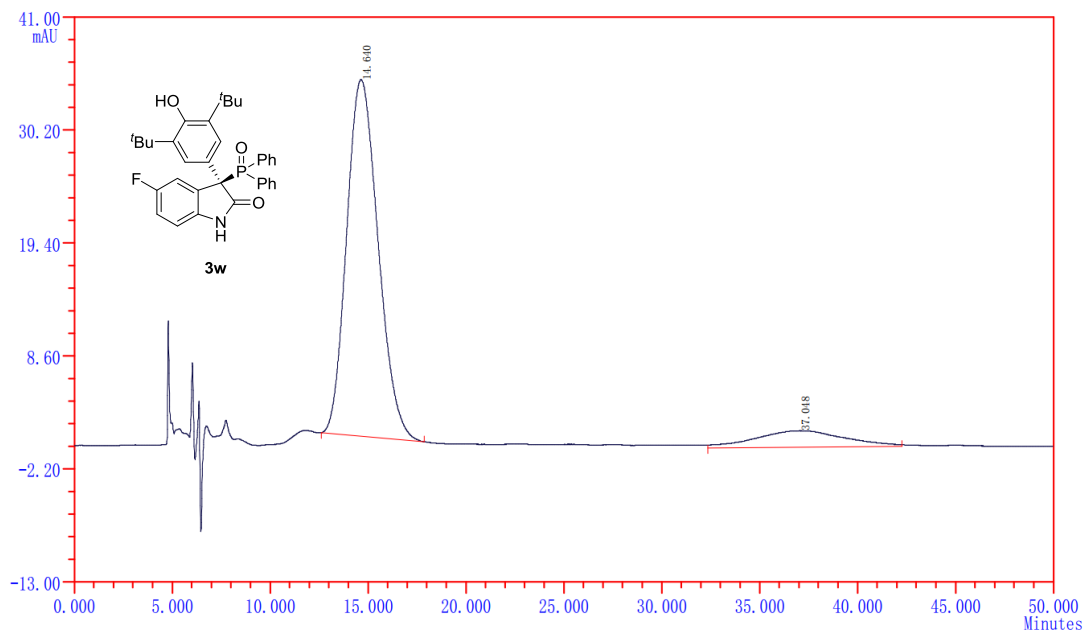

| Peak # | RetTime [Min] | Height [mAu] | Area [mAu*s] | Area %   |
|--------|---------------|--------------|--------------|----------|
| 1      | 14.640        | 34.08        | 3813.059     | 88.402   |
| 2      | 37.048        | 1.57         | 500.271      | 11.598   |
| Total: |               | 35.65        | 4313.329     | 100.0000 |

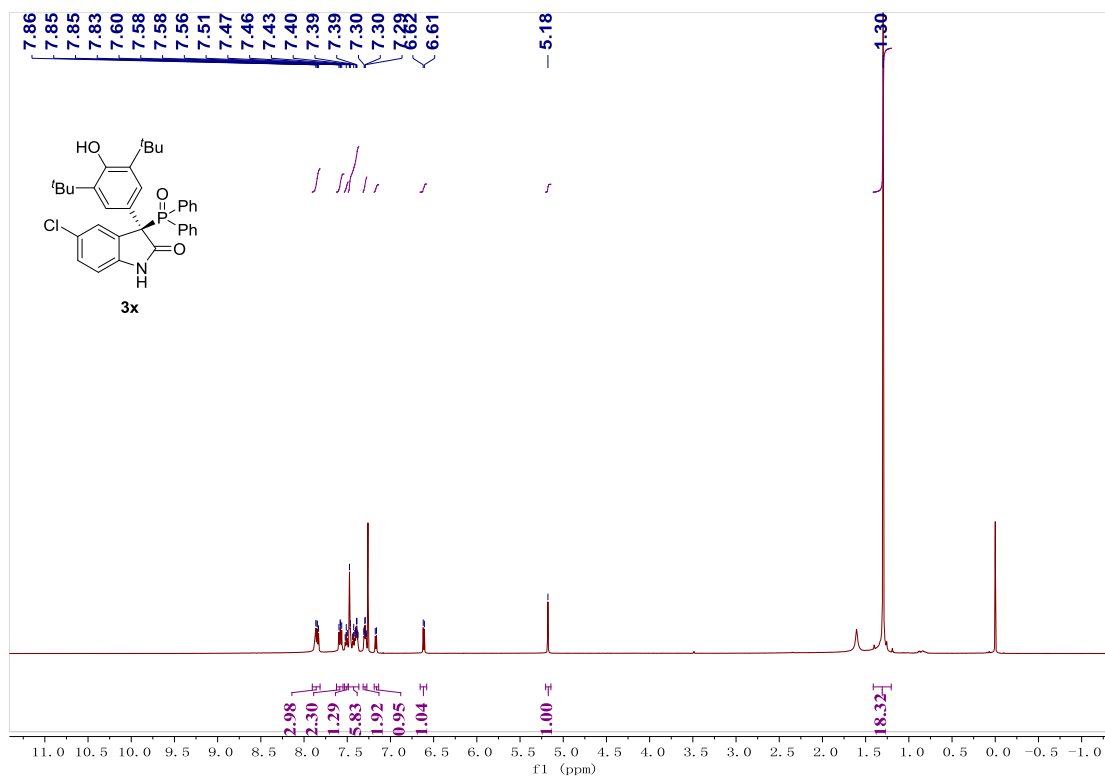

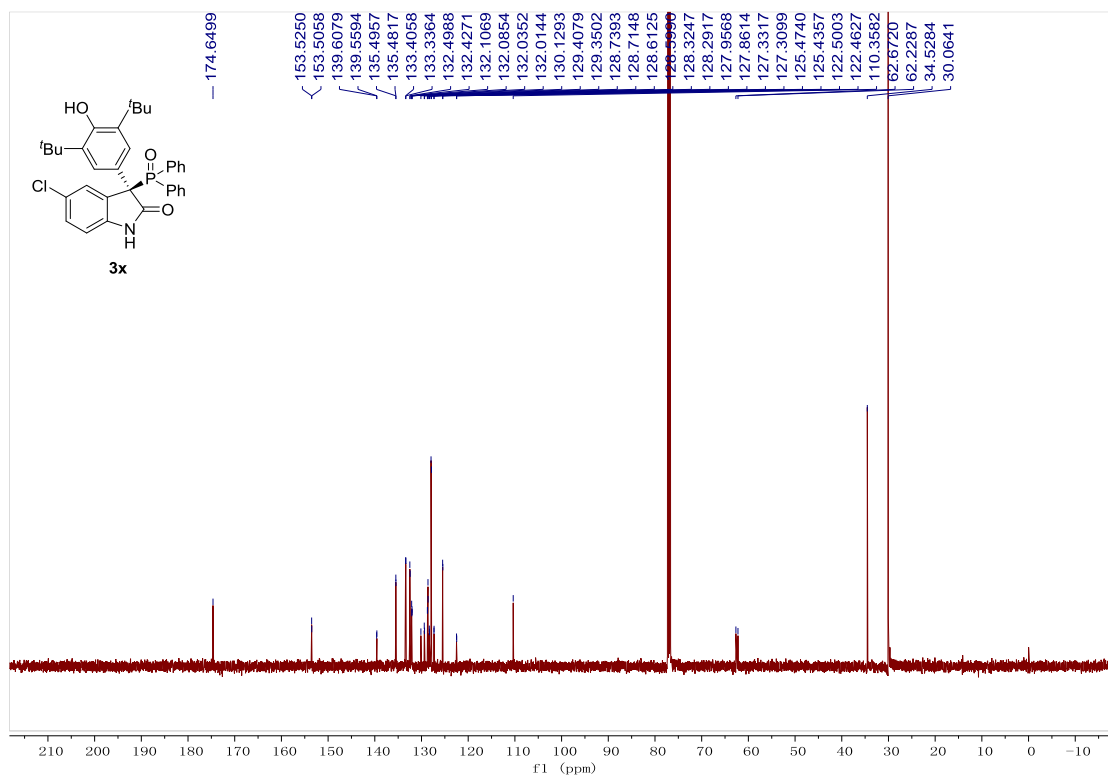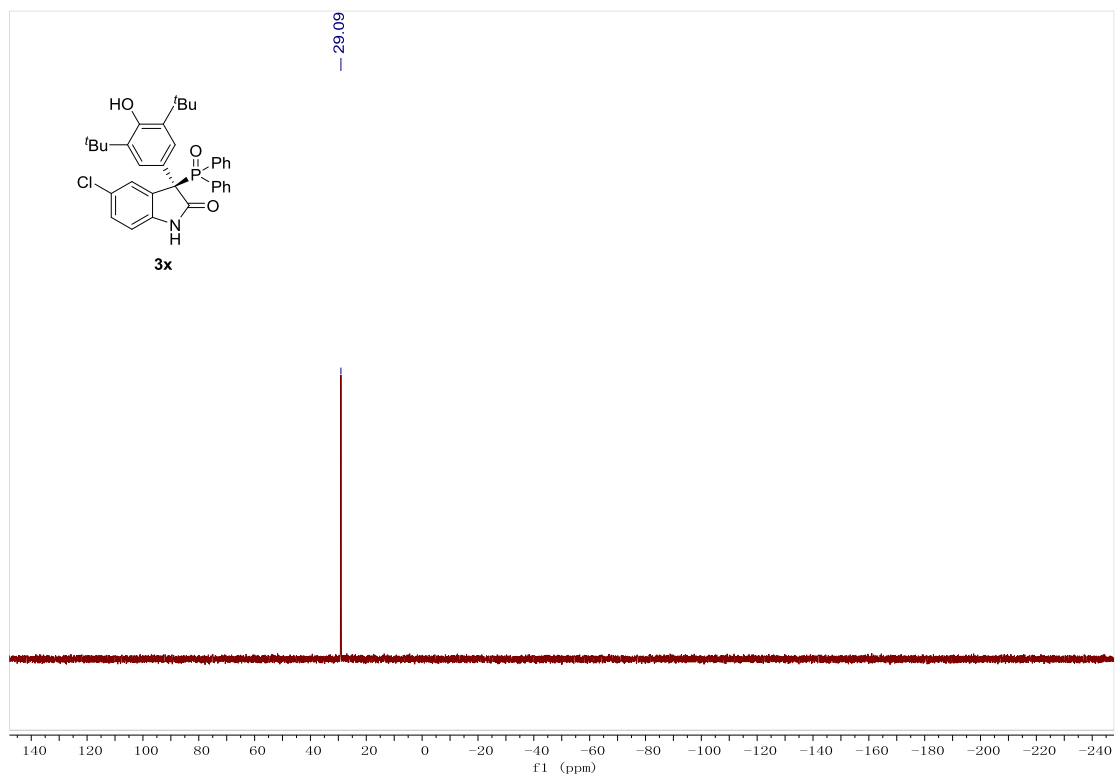

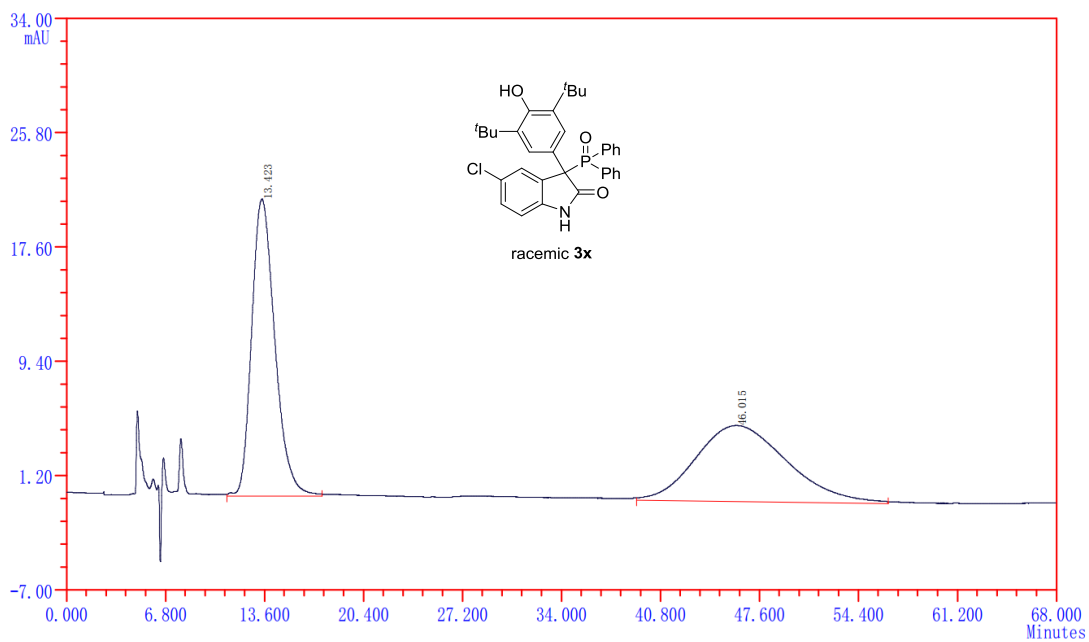

| Peak # | RetTime [Min] | Height [mAu] | Area [mAu*s] | Area %   |
|--------|---------------|--------------|--------------|----------|
| 1      | 13.423        | 21.32        | 2370.528     | 49.863   |
| 2      | 46.015        | 5.46         | 2383.528     | 50.137   |
| Total: |               | 26.78        | 4754.056     | 100.0000 |

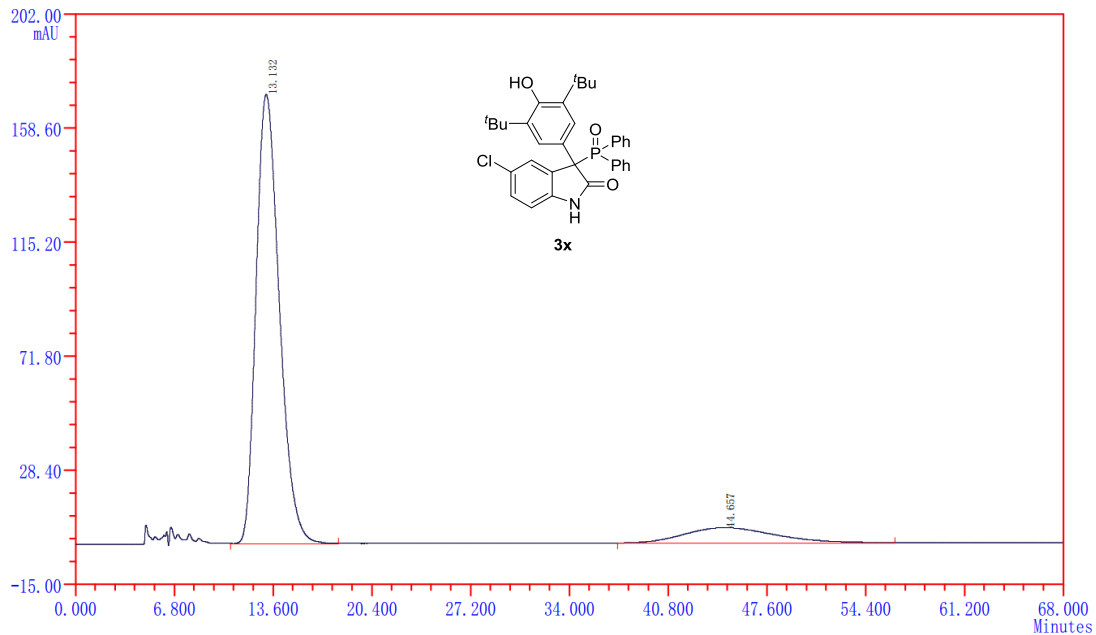

| Peak # | RetTime [Min] | Height [mAu] | Area [mAu*s] | Area %   |
|--------|---------------|--------------|--------------|----------|
| 1      | 13.132        | 171.10       | 19081.969    | 87.700   |
| 2      | 44.657        | 5.94         | 2676.285     | 12.300   |
| Total: |               | 177.04       | 21758.254    | 100.0000 |

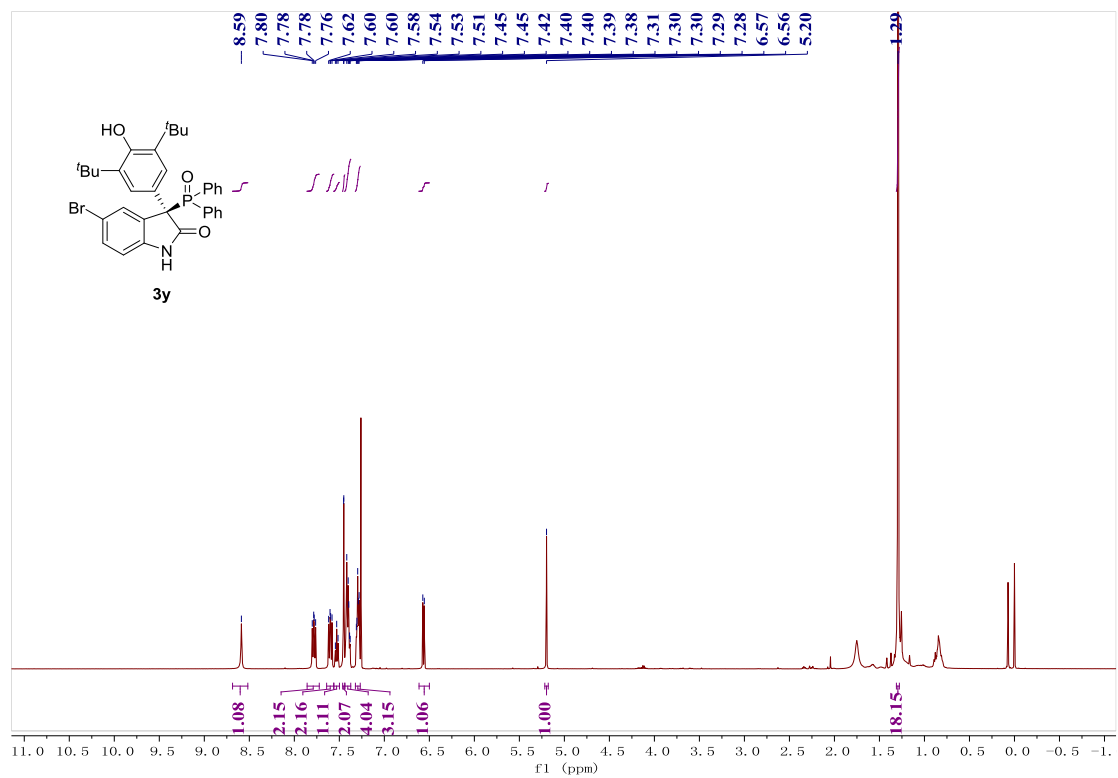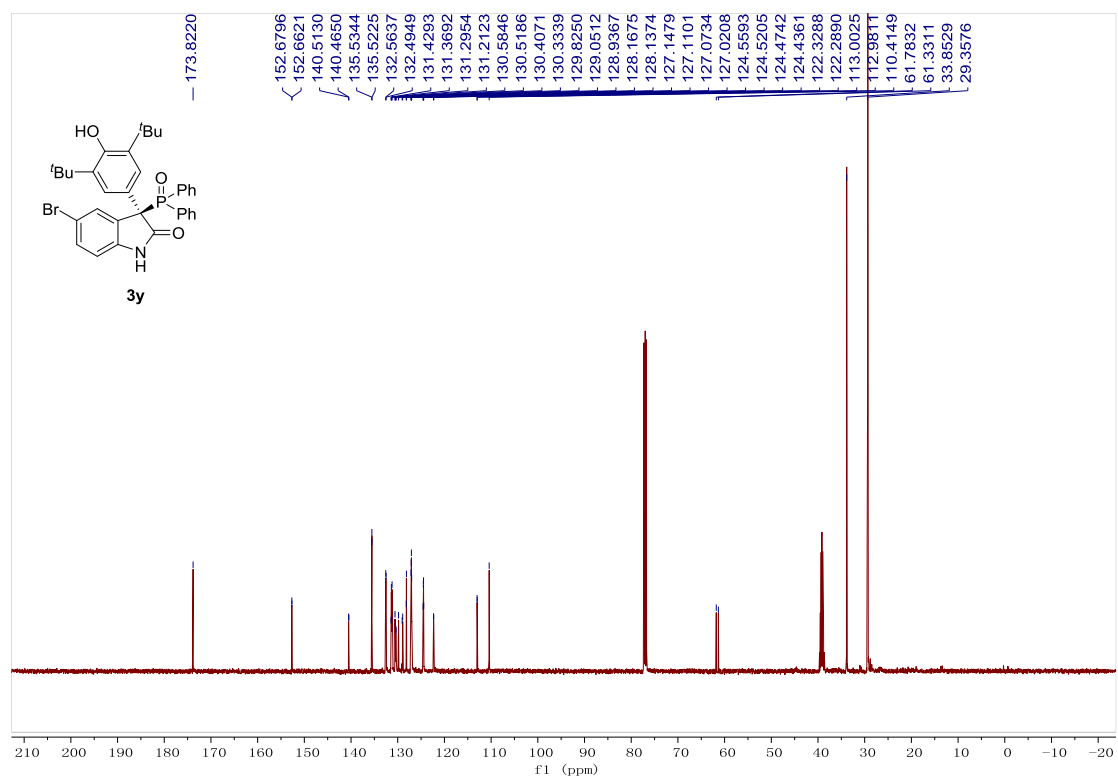

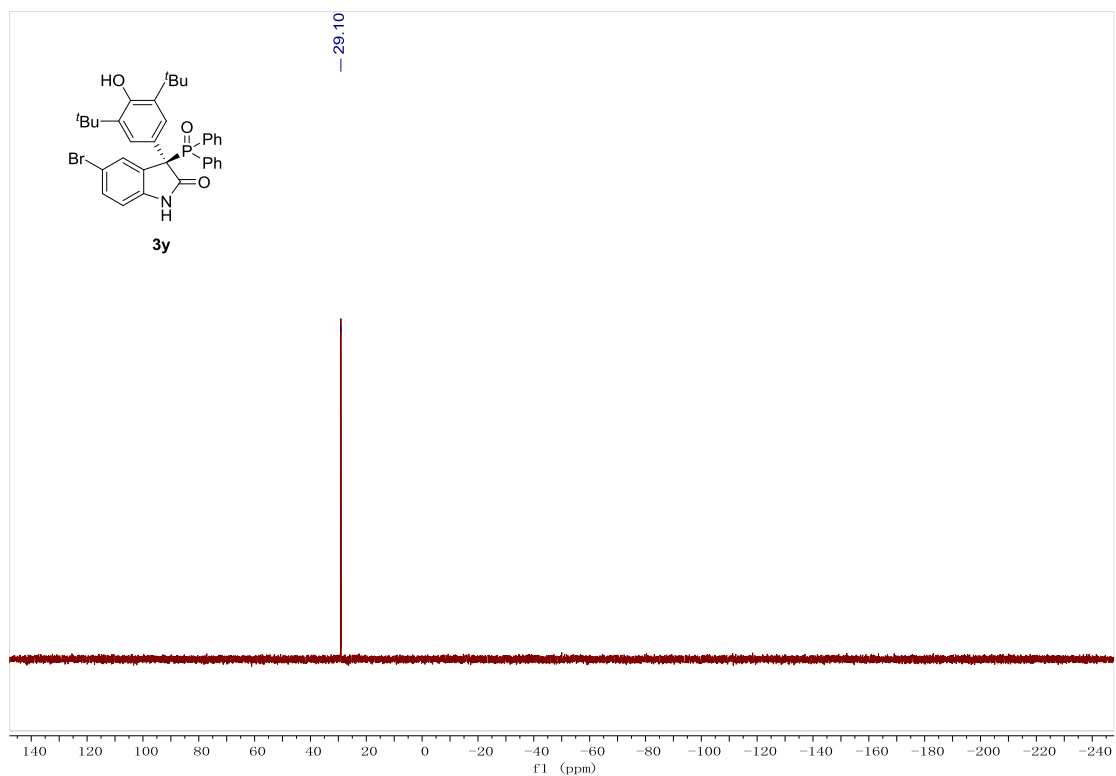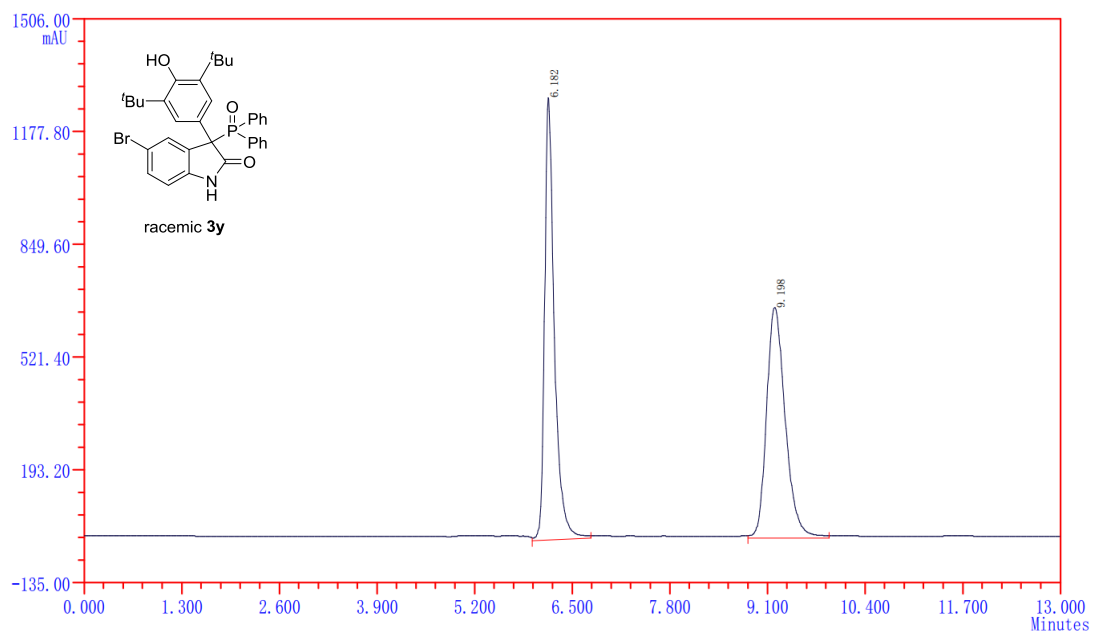

| Peak # | RetTime [Min] | Height [mAu] | Area [mAu*s] | Area %   |
|--------|---------------|--------------|--------------|----------|
| 1      | 6.182         | 1287.10      | 11642.276    | 49.993   |
| 2      | 9.198         | 669.89       | 11645.343    | 50.007   |
| Total: |               | 1956.99      | 23287.618    | 100.0000 |

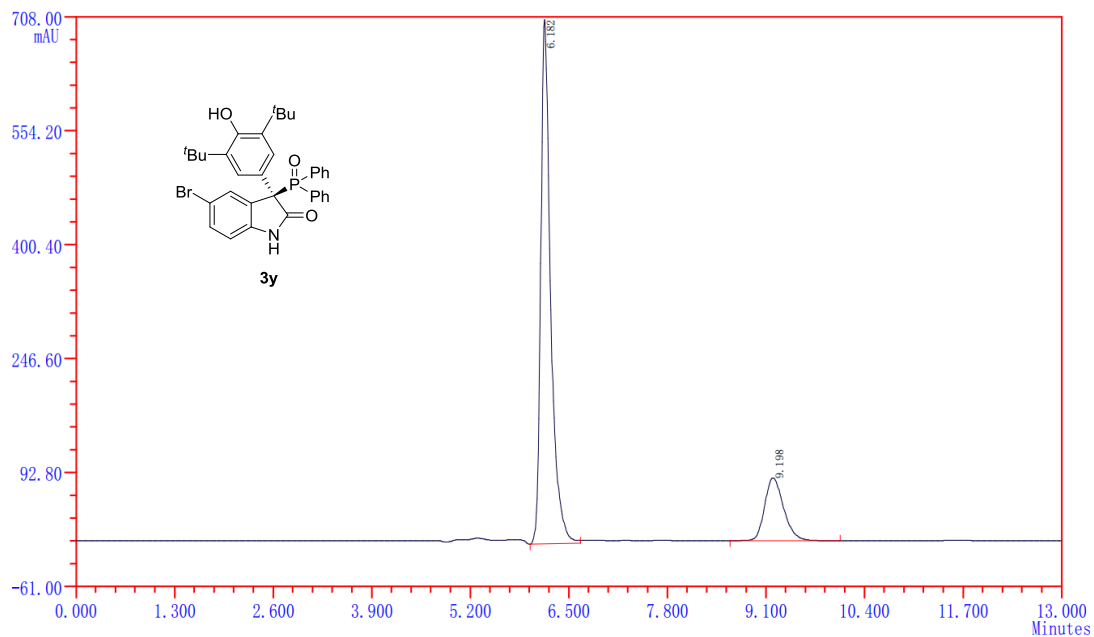

| Peak # | RetTime [Min] | Height [mAu] | Area [mAu*s] | Area %   |
|--------|---------------|--------------|--------------|----------|
| 1      | 6.182         | 710.37       | 6411.635     | 81.179   |
| 2      | 9.198         | 84.95        | 1486.527     | 18.821   |
| Total: |               | 795.32       | 7898.162     | 100.0000 |

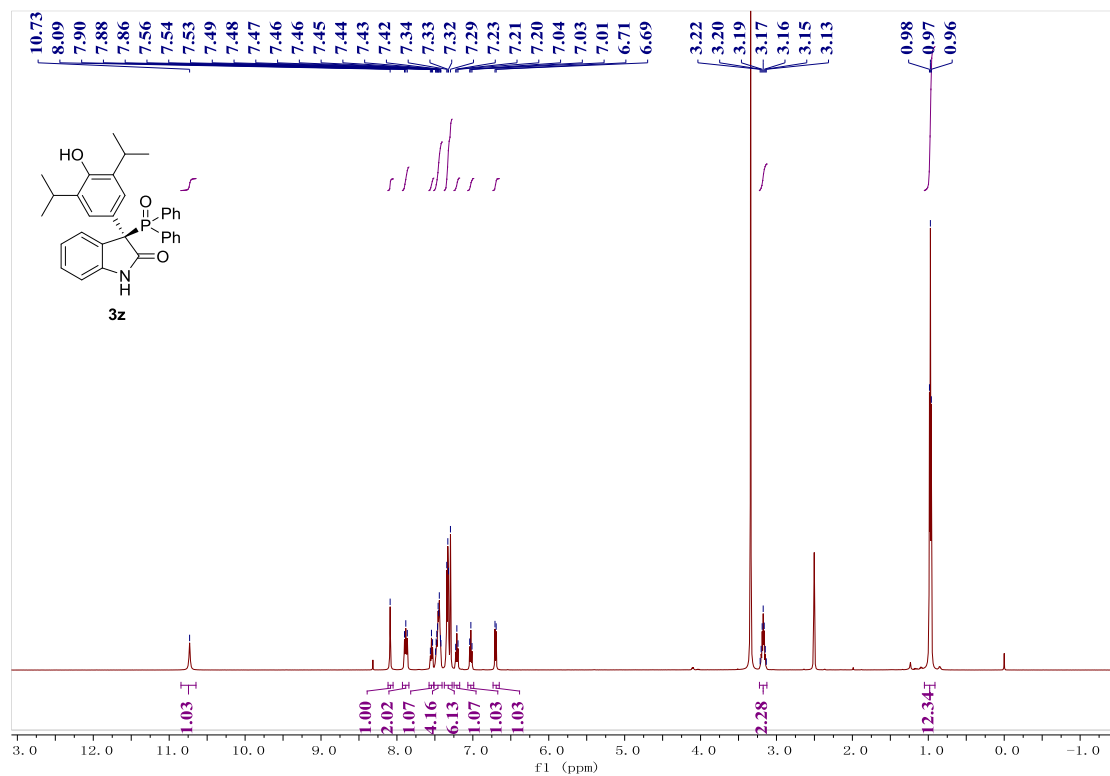



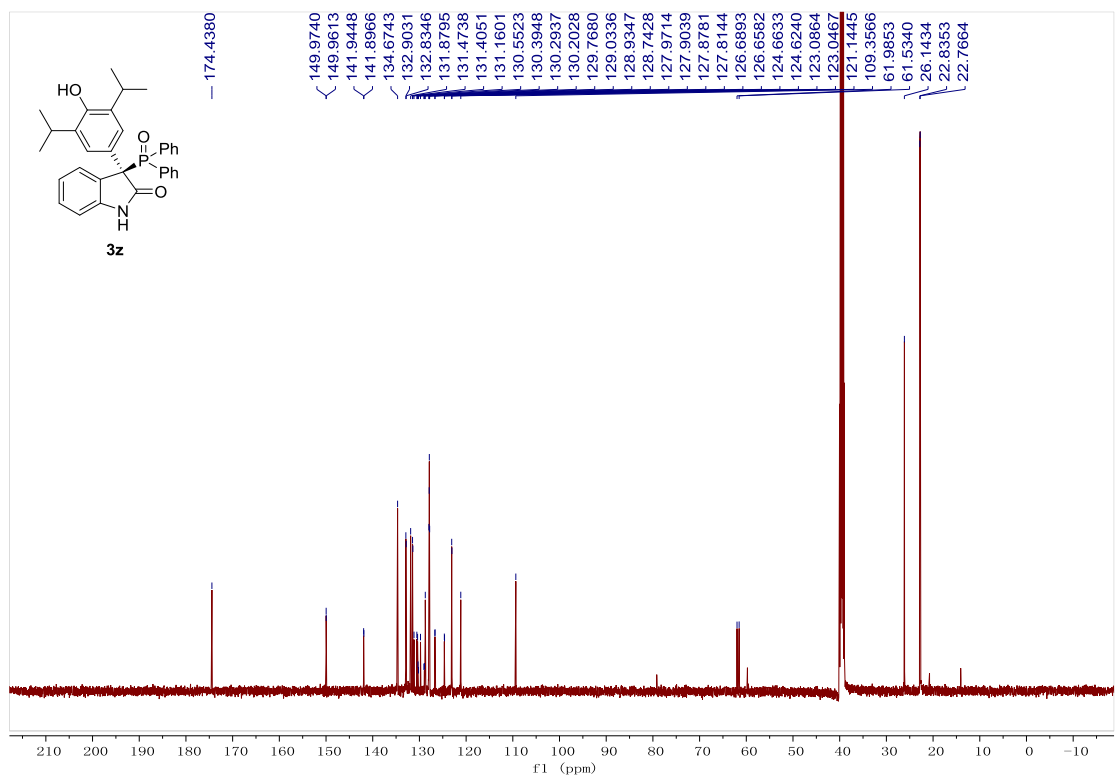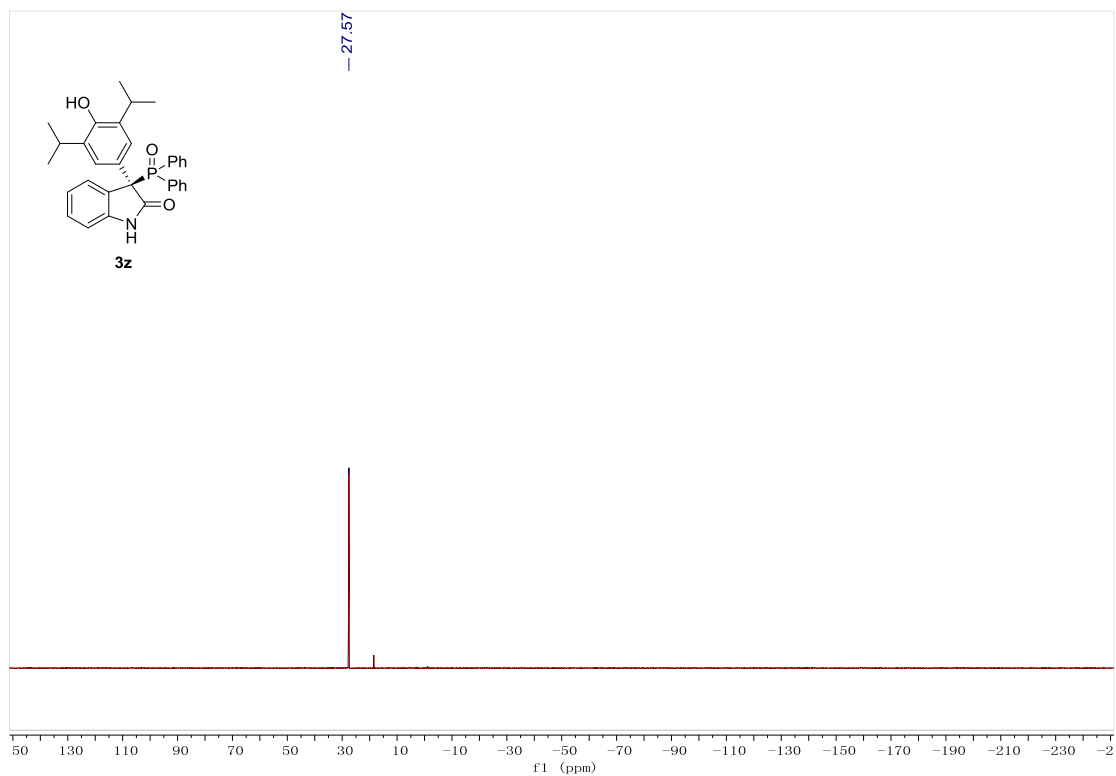

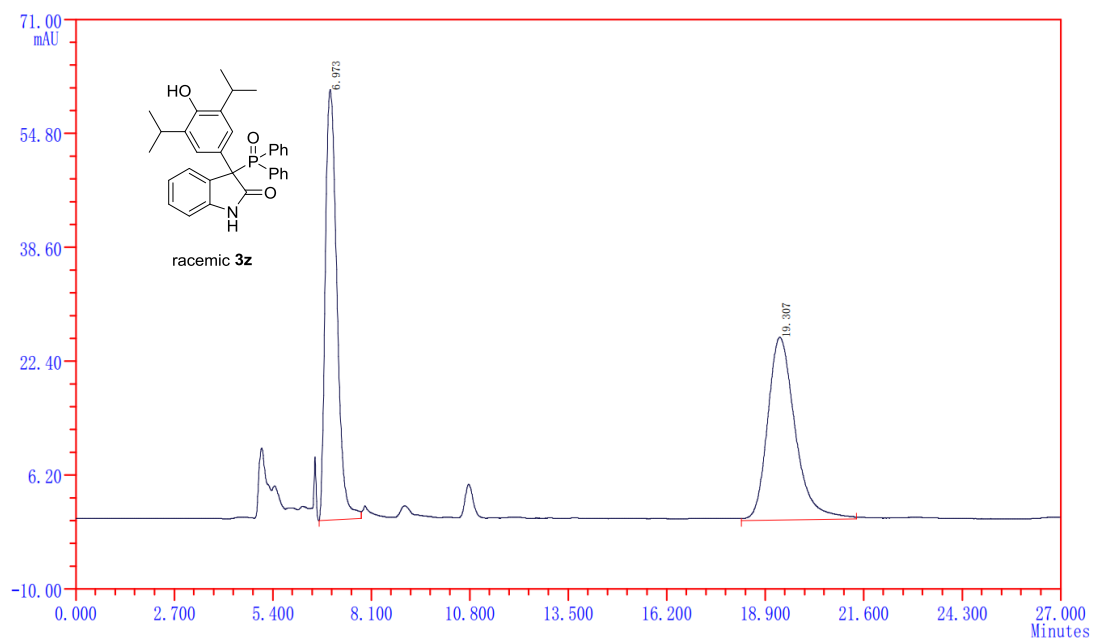

| Peak # | RetTime [Min] | Height [mAu] | Area [mAu*s] | Area %   |
|--------|---------------|--------------|--------------|----------|
| 1      | 6.973         | 61.25        | 1358.339     | 49.876   |
| 2      | 19.307        | 25.96        | 1365.105     | 50.124   |
| Total: |               | 87.21        | 2723.444     | 100.0000 |

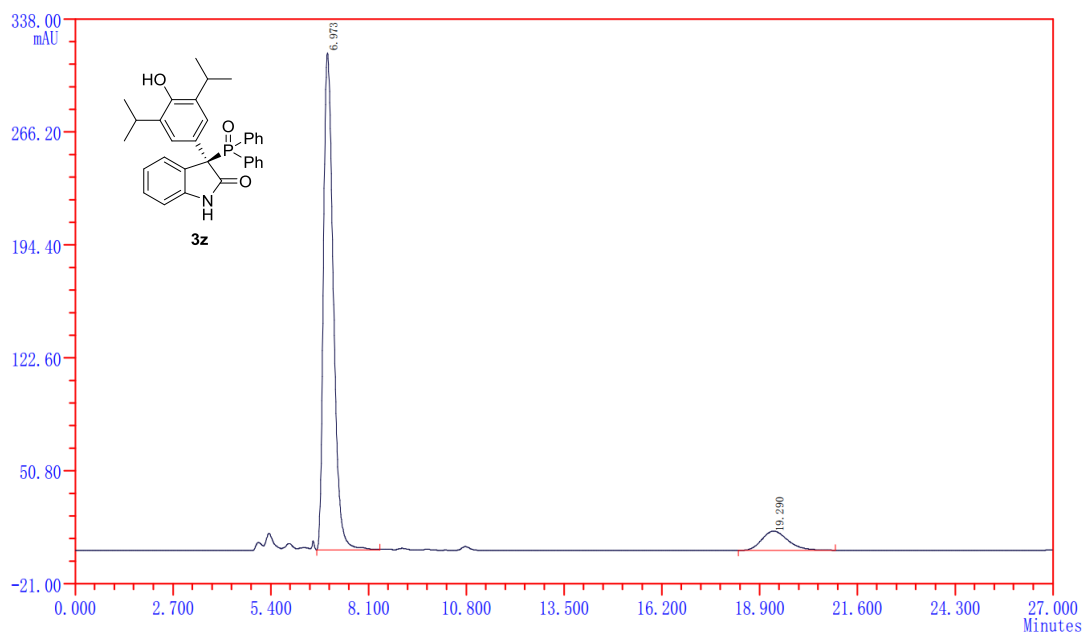

| Peak # | RetTime [Min] | Height [mAu] | Area [mAu*s] | Area %   |
|--------|---------------|--------------|--------------|----------|
| 1      | 6.973         | 315.97       | 6010.459     | 90.754   |
| 2      | 19.290        | 12.21        | 612.331      | 9.246    |
| Total: |               | 328.18       | 6622.790     | 100.0000 |

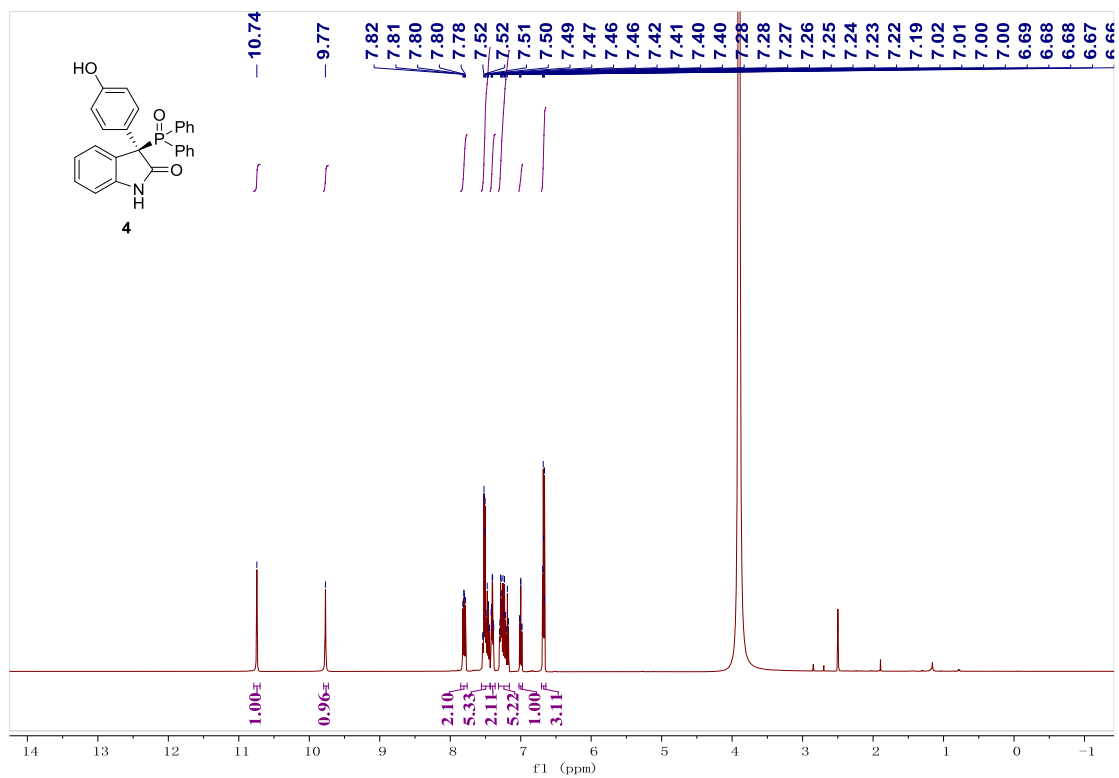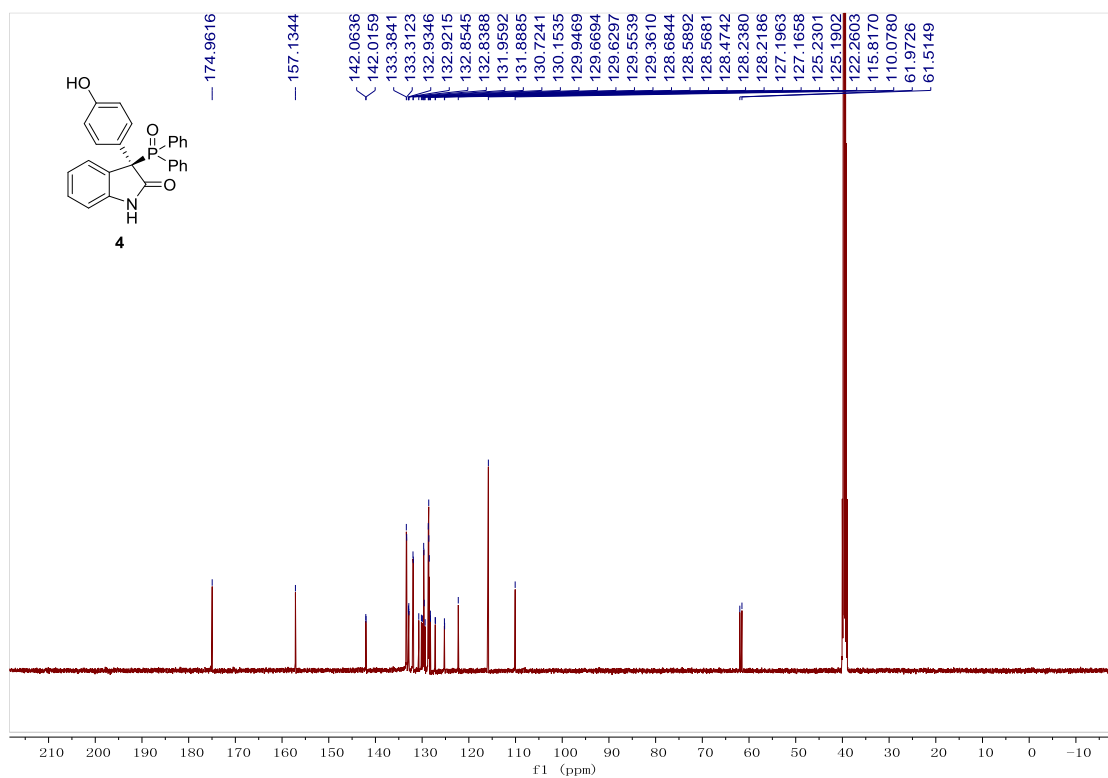

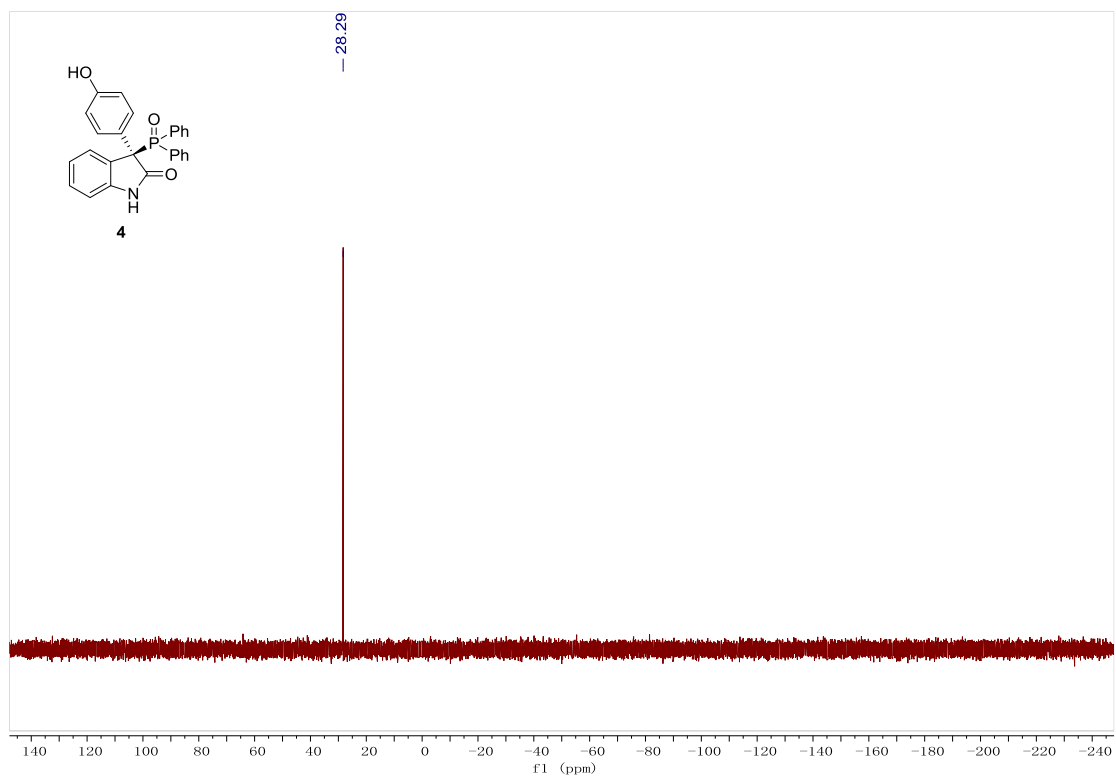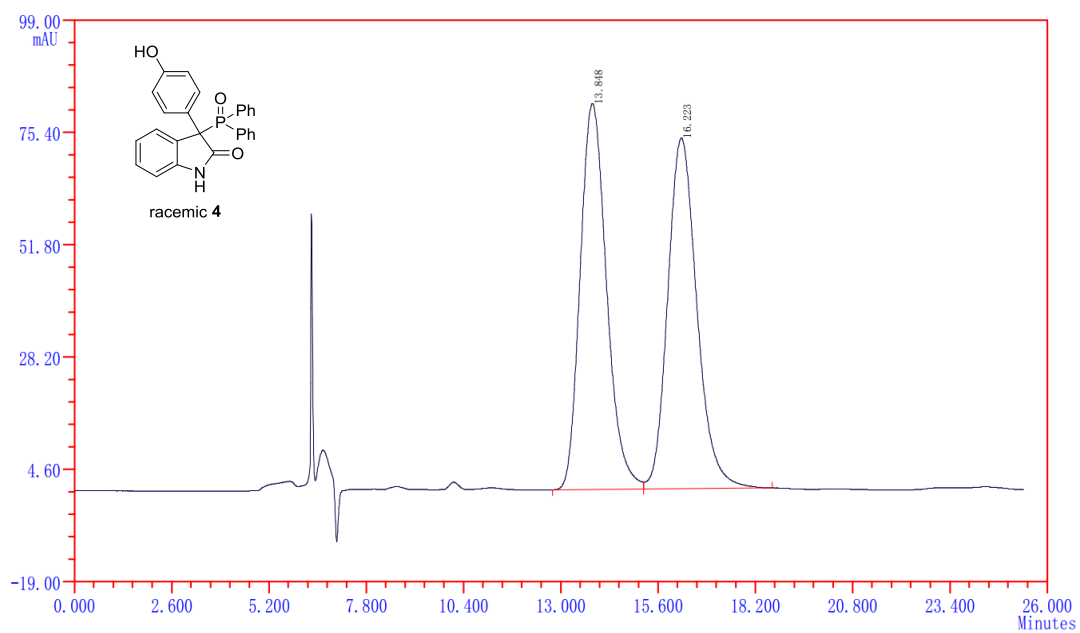

| Peak # | RetTime [Min] | Height [mAu] | Area [mAu*s] | Area %   |
|--------|---------------|--------------|--------------|----------|
| 1      | 13.848        | 81.12        | 3985.562     | 49.910   |
| 2      | 16.223        | 73.69        | 3999.863     | 50.090   |
| Total: |               | 328.18       | 7985.425     | 100.0000 |

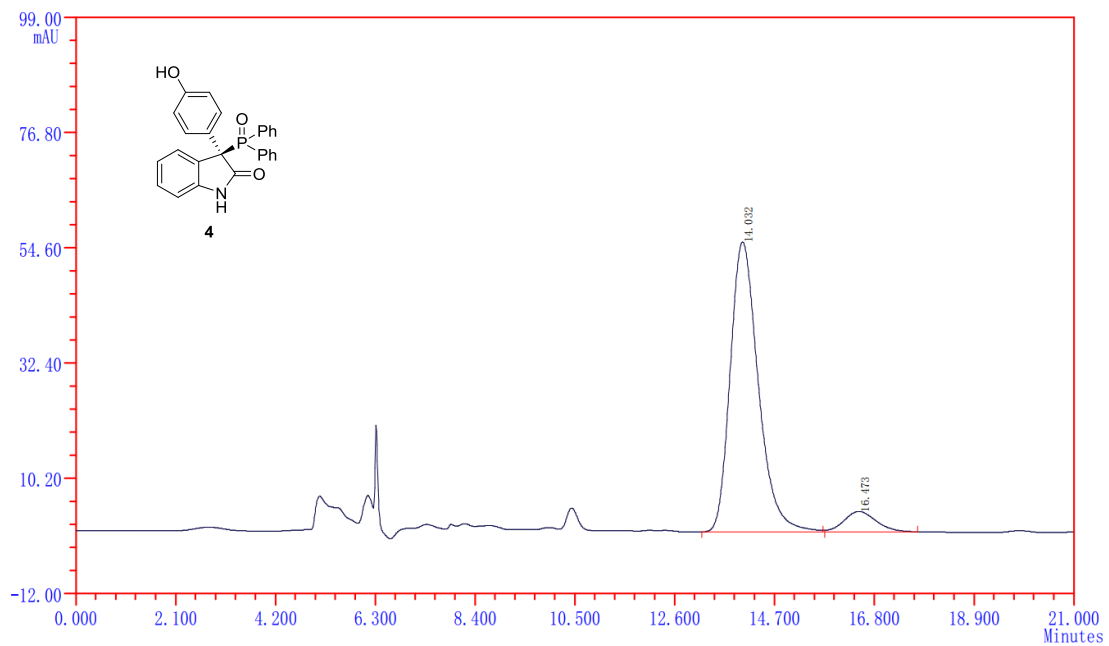

| Peak # | RetTime [Min] | Height [mAu] | Area [mAu*s] | Area %   |
|--------|---------------|--------------|--------------|----------|
| 1      | 14.032        | 55.84        | 2293.949     | 92.587   |
| 2      | 16.473        | 3.91         | 183.670      | 7.413    |
| Total: |               | 59.75        | 2477.619     | 100.0000 |
